# Supplementary material for: Health-related quality of life and anxiety in the PAN-CAN lung cancer screening cohort
Source: PubMed Central journal article supplement — BMJ Open. 2019 Jan 17;9(1):e024719. doi: 10.1136/bmjopen-2018-024719 (PMC6340441; doi:10.1136/bmjopen-2018-024719), 2019-01-17
Supplement: bmjopen-2018-024719.draft_revisions.pdf [file bmjopen-2018-024719.draft_revisions.pdf]

# BMJ Open

BMJ Open is committed to open peer review. As part of this commitment we make the peer review history of every article we publish publicly available.

When an article is published we post the peer reviewers' comments and the authors' responses online. We also post the versions of the paper that were used during peer review. These are the versions that the peer review comments apply to.

The versions of the paper that follow are the versions that were submitted during the peer review process. They are not the versions of record or the final published versions. They should not be cited or distributed as the published version of this manuscript.

BMJ Open is an open access journal and the full, final, typeset and author-corrected version of record of the manuscript is available on our site with no access controls, subscription charges or pay-per-view fees (<http://bmjopen.bmj.com>).

If you have any questions on BMJ Open's open peer review process please email [info.bmjopen@bmj.com](mailto:info.bmjopen@bmj.com)

# BMJ Open

## Health-Related Quality of Life and Anxiety in the PAN-CAN Lung Cancer Screening Study

|                               |                                                                                                                                                                                                                                                                                                                                                                                                                                                                                                                                                                                                                                                                                                                                                                                                                                                                                                                                                                                                                                                                                                                                                                                                                                                                                                                                                                                                                                                                                                                                                    |
|-------------------------------|----------------------------------------------------------------------------------------------------------------------------------------------------------------------------------------------------------------------------------------------------------------------------------------------------------------------------------------------------------------------------------------------------------------------------------------------------------------------------------------------------------------------------------------------------------------------------------------------------------------------------------------------------------------------------------------------------------------------------------------------------------------------------------------------------------------------------------------------------------------------------------------------------------------------------------------------------------------------------------------------------------------------------------------------------------------------------------------------------------------------------------------------------------------------------------------------------------------------------------------------------------------------------------------------------------------------------------------------------------------------------------------------------------------------------------------------------------------------------------------------------------------------------------------------------|
| Journal:                      | <i>BMJ Open</i>                                                                                                                                                                                                                                                                                                                                                                                                                                                                                                                                                                                                                                                                                                                                                                                                                                                                                                                                                                                                                                                                                                                                                                                                                                                                                                                                                                                                                                                                                                                                    |
| Manuscript ID                 | bmjopen-2018-024719                                                                                                                                                                                                                                                                                                                                                                                                                                                                                                                                                                                                                                                                                                                                                                                                                                                                                                                                                                                                                                                                                                                                                                                                                                                                                                                                                                                                                                                                                                                                |
| Article Type:                 | Research                                                                                                                                                                                                                                                                                                                                                                                                                                                                                                                                                                                                                                                                                                                                                                                                                                                                                                                                                                                                                                                                                                                                                                                                                                                                                                                                                                                                                                                                                                                                           |
| Date Submitted by the Author: | 28-Jun-2018                                                                                                                                                                                                                                                                                                                                                                                                                                                                                                                                                                                                                                                                                                                                                                                                                                                                                                                                                                                                                                                                                                                                                                                                                                                                                                                                                                                                                                                                                                                                        |
| Complete List of Authors:     | <p>Taghizadeh, Niloofar; University of Calgary, Medicine<br/> Tremblay, Alain; University of Calgary, Medicine<br/> Cressman, Sonya; The British Columbia Cancer Agency ,<br/> Peacock, Stuart; Canadian Centre for Applied Research in Cancer Control,<br/> McWilliams, Annette; Fiona Stanley Hospital and University of Western<br/> Australia<br/> MacEachern, Paul; University of Calgary, Medicine<br/> Johnson, Michael; Beatrice Hunter Cancer Research Institute and Dalhousie<br/> University<br/> Goffin, John; The Juravinski Cancer Centre and McMaster University<br/> Goss, Glen ; The Ottawa Hospital Cancer Center<br/> Nicholas, Garth ; The Ottawa Hospital Cancer Center<br/> Martel, Simon; Centre de recherche, Institut universitaire de cardiologie et<br/> de pneumologie de Québec,<br/> Laberge, Francis; Centre de recherche, Institut universitaire de cardiologie<br/> et de pneumologie de Québec<br/> Bhatia, Rick; Memorial University<br/> Liu, Geoffrey; University Health Network and Princess Margaret Cancer<br/> Centre<br/> Schmidt, Heidi; University Health Network and Princess Margaret Cancer<br/> Centre<br/> Khattra, Sukhinder; University of British Columbia, Faculty of Medicine-<br/> Respiratory Division<br/> Tsao, Ming-Sound; University of Toronto Department of Laboratory<br/> Medicine and Pathobiology,<br/> Tammemagi, Martin; Brock University, Community Health Sciences<br/> Lam, Dr. Stephen; University of British Columbia, Faculty of Medicine-<br/> Respiratory Division</p> |
| Keywords:                     | Lung cancer, Health-related quality of life, low-dose chest CT, screening, early detection                                                                                                                                                                                                                                                                                                                                                                                                                                                                                                                                                                                                                                                                                                                                                                                                                                                                                                                                                                                                                                                                                                                                                                                                                                                                                                                                                                                                                                                         |
|                               |                                                                                                                                                                                                                                                                                                                                                                                                                                                                                                                                                                                                                                                                                                                                                                                                                                                                                                                                                                                                                                                                                                                                                                                                                                                                                                                                                                                                                                                                                                                                                    |

SCHOLARONE™  
Manuscripts

## Health-Related Quality of Life and Anxiety in the PAN-CAN Lung Cancer Screening Study

Niloofer Taghizadeh<sup>1</sup>, Alain Tremblay<sup>1</sup>, Sonya Cressman<sup>2</sup>, Stuart Peacock<sup>2</sup>, Annette M. McWilliams<sup>3</sup>, Paul MacEachern<sup>1</sup>, Michael R. Johnston<sup>4</sup>, John Goffin<sup>5</sup>, Glen Goss<sup>6</sup>, Garth Nicholas<sup>6</sup>, Simon Martel<sup>7</sup>, Francis Laberge<sup>7</sup>, Rick Bhatia<sup>8</sup>, Geoffrey Liu<sup>9</sup>, Heidi Schmidt<sup>9</sup>, Sukhinder Atkar-Khattra<sup>2</sup>, Ming-Sound Tsao<sup>9</sup>, Martin C. Tammemagi<sup>10</sup>, Stephen C. Lam<sup>2</sup>, for the Pan-Canadian Early Lung Cancer Study Group.

**Corresponding Author:** Alain Tremblay MDCM, 3300 Hospital Drive NW, Calgary, AB, Canada T2N4N1. Phone 403-210-3866, fax 403-944-1577. ORCID 0000-0002-0025-7426 Email: [atrembla@ucalgary.ca](mailto:atrembla@ucalgary.ca)

### Institutions:

1. University of Calgary, Calgary, AB, Canada.
2. The British Columbia Cancer Agency, Vancouver, BC, Canada.
3. Fiona Stanley Hospital and University of Western Australia, Perth, WA, Australia.
4. Beatrice Hunter Cancer Research Institute and Dalhousie University, Halifax, NS, Canada.
5. The Juravinski Cancer Centre and McMaster University, Hamilton, ON, Canada.
6. The Ottawa Hospital Cancer Center, Ottawa, ON, Canada.
7. Institut Universitaire de Cardiologie et de Pneumologie de Québec, Québec, QC, Canada.
8. Memorial University, St-John's NF, Canada
9. University Health Network and Princess Margaret Cancer Centre, Toronto, Ontario, Canada.
10. Brock University, St. Catharines, ON, Canada.

**Word Count: 3404**

### Strengths and Limitation of this Study:

- This study is the first to describe the psychological and quality of life impacts of lung cancer screening on *discrete* individuals undergoing low-dose CT examinations.
- This allows the calculation of number-needed-to-harm estimates based on the minimal clinically significant difference of each instrument rather than mean group changes, important in the informed decision-making process with individuals considering this intervention.
- Our cohort was drawn from a multi-center study with high follow-up rates using a participant's baseline status to detect any changes post-screening.
- Limitations include the lack of an unscreened control group and the relative homogeneity of our participants (Canadian, Caucasian).

1  
2  
3 **Abbreviation list**  
4  
5  
6  
7  
8  
9

10 AFB: Autofluorescence bronchoscopy  
11  
12

13 GGO: Ground-glass opacity  
14  
15

16 HRQoL: Health-related quality of life  
17  
18

19 LDCT: Low-dose computed tomography  
20  
21

22 MCID: Minimal Clinically Important Difference  
23  
24

25 NLST: The National Lung Screening Trial  
26  
27

28 NNH: Number-needed-to-harm  
29  
30

31 SF-12: Physical and Mental Component Scales  
32  
33

34 SIFs: Incidental findings  
35  
36

37 STAI: State Trait Anxiety Inventory  
38  
39  
40  
41  
42  
43  
44  
45  
46  
47  
48  
49  
50  
51  
52  
53  
54  
55  
56  
57

## Abstract

**Objectives:** The impact of lung cancer screening with low-dose chest CT (LDCT) on participants' anxiety levels and health-related quality of life (HRQoL) is an important consideration in the implementation of such programs. We aimed to describe changes in anxiety and HRQoL in a high-risk Canadian cohort undergoing LDCT lung cancer screening.

**Methods:** 2,537 subjects who had 2% or greater lung cancer risk over 6 years using a risk prediction tool were recruited from 8 centers across Canada in the Pan-Canadian Early Detection of Lung Cancer Study (2008-2010). We compared HRQoL and anxiety levels before and after screening of 1,237 participants with LDCT, (excluding a subset of 1,300 participants who also underwent autofluorescence bronchoscopy screening), as well as after investigations performed because of a positive screening examination. The 12-item short-form Physical and Mental Component Scales (SF-12), EQ-5D-3L scores, and State Trait Anxiety Inventory (STAI) - State anxiety were used at each assessment.

**Results:** Overall, there were no clinically significant differences in HRQoL outcomes between baseline and each of the survey time points following initial screening. No mean change in anxiety in the overall cohort was noted following baseline LDCT, but more participants had clinically significant increase in anxiety vs. decrease after baseline screening [increase > Minimal Clinically Important Difference (MCID) (n=180) vs. decrease >MCID (n=50),  $p<0.001$ ]. This finding persisted but to a lesser degree at the 12-month time point [increase >MCID (n=146) vs. decrease >MCID (n=87),  $p<0.001$ ] and was present in both the cohort with negative and positive examinations.

1  
2  
3 **Conclusions:** CT Screening for Lung Cancer has no major overall impact on HRQoL among participants,  
4  
5 although a minority of participants (number-needed-to-harm = 7 after baseline screening and 18 at one  
6  
7 year) demonstrated clinically significant increased anxiety levels.  
8  
9  
10  
11  
12  
13

14  
15 **Clinical Trial Registration:** ClinicalTrials.gov; No.: NCT00751660; URL: www.clinicaltrials.gov.  
16  
17  
18  
19  
20

21  
22 **Keywords:** Health-related quality of life, lung cancer, low-dose chest CT, screening, early detection  
23  
24  
25  
26  
27  
28  
29  
30  
31  
32  
33  
34  
35  
36  
37  
38  
39  
40  
41  
42  
43  
44  
45  
46  
47  
48  
49  
50  
51  
52  
53  
54  
55  
56  
57  
58  
59  
60

## INTRODUCTION

Lung cancer is the leading cause of cancer death in North America and around the world,[1]. Early detection and treatment of lung cancer through screening is a promising strategy to reduce lung cancer mortality,[2]. The largest trial performed to date, the National Lung Screening Trial (NLST), demonstrated that low-dose computed tomography (LDCT) screening in high risk individuals (i.e., ever smokers aged 55 to 74 years,  $\geq 30$  pack-years of smoking and  $< 15$  years since quitting) significantly reduced lung cancer mortality,[3]. American and Canadian preventative health care agencies have since published recommendations in favor of LDCT lung cancer screening,[3,4]. However, no screening intervention is without potential harm, including adverse psychological impact of the screening intervention, screening results, or subsequent investigations in most participants who will not be found to have cancer. Potential detriments of lung cancer screening include anxiety, and distress from the evaluation of both CT detected false positive and over-diagnosed cancers. A small proportion of the screen-detected tumors would never lead to clinical symptoms, but these over-diagnosed lung cancers are frequently treated, with associated risks of adverse effects,[5,6]. Moreover, studies have shown that CT lung screening has a high rate of significant lung cancer-unrelated incidental findings (SIFs),[7]. These SIFs may require additional investigations and therefore can be associated with adverse psychological impact on participants in a screening program,[6].

A recent systematic review on the psychological burden of LDCT revealed that LDCT screening may be associated with a short-term psychological burden in participants,[8]. Studies to date have explored mean changes in groups of individuals rather than rates of clinically significant changes in individuals screened. Effective policy decisions regarding the implementation of lung cancer screening and informed decision making by individuals requires reliable evidence on its potential impacts on Health Related Quality of



1  
2  
3  
4  
5  
6  
7  
8  
9  
10  
11  
12  
13  
14  
15  
16  
17  
18  
19  
20  
21  
22  
23  
24  
25  
26  
27  
28  
29  
30  
31  
32  
33  
34  
35  
36  
37  
38  
39  
40  
41  
42  
43  
44  
45  
46  
47  
48  
49  
50  
51  
52  
53  
54  
55  
56  
57  
58  
59  
60

Life (HRQoL) and psychological wellbeing of individual participants,[9]. Therefore, this study aimed to evaluate the impact of screening modalities on the quality of life and anxiety of participants in the Pan-Canadian Early Detection of Lung Cancer Study.

For peer review only

## METHODS

### Study design and population

The Pan-Canadian Early Detection of Lung Cancer Study, which has been described in detail previously,[10,11], enrolled current or former smokers aged between 50-75 years and with a 2% or greater lung cancer risk over 6 years using a risk-prediction model developed using Prostate, Lung, Colorectal, and Ovarian Cancer Screening Trial data,[12]. Participants were recruited in 8 centers across Canada (Calgary, Halifax, Hamilton, Laval, Ottawa, St-John's, Toronto and Vancouver) from September 2008 to December 2010 with each centers' institutional review board approving the study. Signed informed consent was obtained from each participant.

All participants were offered baseline LDCT with repeat screening at year 1 and 4 in addition to LDCT scans as appropriate for nodule follow-up, with the first half of the recruited subjects to receive autofluorescence bronchoscopy (AFB) as an additional screening modality,[13]. However, since AFB does not appear effective in the screening environment,[13], and to avoid the potential confounding impact of AFB on HRQL, participants in the AFB arm of the study are excluded from the current analysis. LDCT scan follow-up protocol were determined by the maximum long axis diameter of the largest nodule identified. Participants with any semi-solid or solid nodule 5 to 10 mm, or ground-glass opacity (GGO) 8-10 mm were to receive an additional LDCT at 3 months, with larger lesion being referred for clinical consultation. Any participant requiring repeat LDCT or investigation for a lung lesion other than a planned 12-month follow-up examination were considered to have a positive screening exam for the purpose of this analysis (figure 1). Participants were informed of the various possible findings which may be found on CT examinations and general protocols for investigations at the time of study consent.

1  
2  
3 Individualized results letters with description of findings appropriate for a non-medical reader were  
4  
5 developed by each study site.  
6  
7

### 9 **Health-Related Quality of life (HRQoL), and anxiety**

10  
11  
12 The 12-item short-form (SF-12) Physical and Mental Component Scales (PCS, and MCS,  
13  
14 respectively),[14] and the EuroQoL questionnaire [EQ-5D-3L (Three-level version of EQ-5D)] were used  
15  
16 to determine the participants' HRQoL at each assessment. The test-retest reliability coefficient is reported  
17  
18 to be 0.89 for the PCS and 0.76 for the MCS. The EQ-5D-3L consists of a preference-based index score  
19  
20 and a visual analogue scale (VAS); the index scores were derived from the current Canadian tariff,[15], (a  
21  
22 maximum (best) value of 1 (for health state 11111) and a minimum value of -0.34 (for 33333)). The VAS  
23  
24 is a likert scale asking participants to draw a line to their current health status on a visual scale ranging  
25  
26 between 0 and 100. Scores on the SF-12 are standardized (i.e., mean = 50 and SD = 10), with a higher  
27  
28 score indicating better HRQoL.  
29  
30  
31  
32  
33

34 To evaluate potential anxiety induced by the results of the screening tests, we used the Spielberger State  
35  
36 Trait Anxiety Inventory (STAI),[16]. Additional methodology details are provided in the online  
37  
38 supplement.  
39  
40  
41

42 The questionnaires were administered in person at the time of study enrolment (baseline), then by phone  
43  
44 within 1 month after the CT results were received by the participants, 1 month after any additional follow-  
45  
46 up CT scan or other testing following a positive screen (post investigations) and prior to the 1st annual  
47  
48 repeat LDCT (12 months post baseline) (figure 1).  
49  
50  
51

### 52 **Statistical analyses**

1  
2  
3 Descriptive analyses of the participants' characteristics and screening outcome were performed. We  
4  
5 calculated summary scores of outcome measures for participants in each category at each of the study time  
6  
7 points (at baseline, 1 month post baseline CT scan, 12 months after baseline, and post investigations). In  
8  
9 addition, the above scores were compared separately in the subset of participants with a positive screening  
10  
11 intervention.  
12  
13  
14

15  
16 To compare overall differences in HRQoL and State-anxiety scores between baseline and each of the  
17  
18 survey time points, Generalized Linear Mixed Models were used to take into account the clustering of  
19  
20 data within the 8 study sites and the repeated measurement of each individuals as well as non-normally  
21  
22 distributed/skewed outcomes. The estimated margin of means with adjustment for multiple comparisons  
23  
24 (Bonferroni correction) was calculated to contrast baseline versus each of the study time points. In these  
25  
26 estimations, margins involving empty cells were treated as not estimable. When significant long-term  
27  
28 differences were noted in our mixed model, we further explored the factor association with the observed  
29  
30 changes using a multivariate regression model with adjustment for scan results, age, gender, self-reported  
31  
32 race, smoking status, pack-years, alcohol consumption, education, family history of any cancer,  
33  
34 participants' concern about getting lung cancer at baseline, and for the clustering of data within 8 study  
35  
36 sites.  
37  
38  
39  
40  
41

42 We further calculated the proportion of individuals with improvement vs. deterioration greater than the  
43  
44 MCID for each instrument. MCIDs for outcome measures were selected based on previously published  
45  
46 results as follows: EQ visual analog scale (VAS)=8,[17], EQ-5D-3L index values=0.05,[18],  
47  
48 PCS=8.1,[19], MCS=4.7,[14], STAI-State Anxiety=10,[20]. The comparisons between these two  
49  
50 proportions were performed using Z-test and if significant, the excess number of cases with improvement  
51  
52 vs. worsening scores were calculated as a percentage of cases with available data. When significant  
53  
54  
55  
56  
57

1  
2  
3 differences were noted, a number-needed-to-harm (NNH) calculation was applied (total number of  
4  
5 case/excess cases with worsened score).  
6  
7

8  
9 Two-sided p-values < 0.05 were considered as statistically significant. All analyses were performed using  
10  
11 SPSS, version 24 (IBM Corp., Armonk, N.Y., USA) or STATA version 14 (StataCorp, College Station,  
12  
13 Texas). Sample size was determined by other primary study factors relating to the screening intervention  
14  
15 and not the current analysis.  
16  
17

### 18 19 **Patient and Public Involvement** 20

21  
22 Patient and public involvement in the design of the research was included through the main funding  
23  
24 agencies collaborating on the project. This includes the Terry Fox Research Institute, the research arm of  
25  
26 The Terry Fox Foundation. In addition, public input was obtained through involvement of the Canadian  
27  
28 Partnership Against Cancer, an independent organization funded by the federal government to accelerate  
29  
30 action on cancer control for all Canadians. Patients were not specifically involved in the recruitment and  
31  
32 conduct of the study and no specific plan to disseminate research findings to participants has been made.  
33  
34  
35  
36  
37  
38  
39  
40  
41  
42  
43  
44  
45  
46  
47  
48  
49  
50  
51  
52  
53  
54  
55  
56  
57

## RESULTS

### Participant characteristics

Two thousand five hundred and thirty-seven participants were enrolled in the Pan-Can study, and 1,237 underwent LDCT alone (without AFB). The mean (SD) age of these participants was 62.9 (6.1) at baseline. Males 558 (45.1 %), Caucasian 1201 (97.1 %), current smokers 768 (62.1 %), and regular alcohol drinkers 961 (77.7 %) comprised the largest groups of participants. The median (IQR) pack-years of smokers was 51.3 (21.6) and mean (SD) duration of smoking was 43.9 (6.1) years. A family history of lung cancer was present in 392 participants (26.6 %), (table 1). Median (IQR) lung cancer risk score was 3.5% (2.9) over 6 years. Positive baseline LDCT examinations were noted in 279 (22.6 %) participants of which 110 (15.1 %) led to a diagnosis of lung cancer.

**Table 1-Baseline characteristics of Pan-Canadian Early Detection of Lung Cancer Study participants.**

| Characteristics                           | All Enrolled<br>(n=1237) |
|-------------------------------------------|--------------------------|
| Age, mean (SD)                            | 62.9 (6.1)               |
| Gender (males), n (%)                     | 558 (45.1)               |
| Race*                                     |                          |
| Caucasian                                 | 1201 (97.1)              |
| Asian                                     | 15 (1.2)                 |
| Black or African Canadian                 | 7 (0.6)                  |
| Aboriginal                                | 4 (0.3)                  |
| Pacific Islander                          | 0 (0.0)                  |
| Other                                     | 10 (0.8)                 |
| Education                                 |                          |
| 8 <sup>th</sup> grade or less             | 32 (2.3)                 |
| 9 <sup>th</sup> to 12 <sup>th</sup> grade | 153 (12.4)               |

|                                                    |                      |
|----------------------------------------------------|----------------------|
| High school graduate                               | 337 (27.2)           |
| Bachelor's degree                                  | 107 (8.7)            |
| Technical/Vocational/School certificate            | 260 (21.0)           |
| Associate degree/some college                      | 205 (16.6)           |
| Advanced Degree                                    | 144 (11.6)           |
| <b>Smoking habits</b>                              |                      |
| Current smokers, n (%)                             | 768 (62.1)           |
| Pack- years, median ( IQR, range)                  | 51.3 (21.6, 2.2-230) |
| Smoking duration, mean (SD)                        | 43.9 (6.1)           |
| <b>Alcohol consumption</b>                         |                      |
| Current regular drinkers**                         | 961 (77.7)           |
| <b>Family history of lung cancer, n (%)</b>        |                      |
| <b>Being worried about getting lung cancer</b>     |                      |
| Rarely or never                                    | 267 (21.6)           |
| Sometimes                                          | 656 (53.0)           |
| Often                                              | 235 (19.0)           |
| All of the time                                    | 75 (6.1)             |
| <b>Scan results at baseline</b>                    |                      |
| Positive                                           | 279 (22.6)           |
| Negative                                           | 958 (77.4)           |
| <b>Lung cancer risk score, median (IQR, range)</b> | 3.5 (2.9, 2.0-33.5)  |

\* Missing, n (%)=5 (0.2).

\*\*Regular alcohol consumption: having more than one drink per week for a period of 6 months or more. Missing, n=11.

## Health-related quality of life and anxiety measures

Baseline

1  
2  
3 At baseline, participants reported being concerned about getting lung cancer always (6.1 %), often  
4 (19.0%) and sometimes (53.0 %). General health problems were reported by 65.0% of respondents on at  
5  
6 least one item on the EQ-5D-3L. Average baseline EQ visual analogue scale (VAS), EQ-5D-3L index  
7  
8 values, PCS, MCS, and STAI-State Anxiety scores were 76.3, 0.84, 46.1, 51.1, and 30.9, respectively  
9  
10 (Table 2).  
11  
12  
13  
14  
15

### 16 Initial screening

17  
18  
19 No statistically significant mean changes in EQ VAS, EQ-5D-3L index values, PCS, or MCS levels were  
20  
21 noted following baseline CT screening. In addition, the proportion of individuals experiencing a  
22  
23 deterioration vs. improvement greater than the MCID for EQ VAS (figure 2), EQ-5D-3L (figure 3),  
24  
25 PCS (figure 4) and MCS (figure 5) were not significantly different. However, the STAI-State Anxiety  
26  
27 levels increased in participants following baseline LDCT [change (95% CI): 2.27 (0.57 to 3.96), p-value  
28  
29 <0.001] (Table 2). A greater proportion of individuals experienced a deterioration vs. improvement greater  
30  
31 than the MCID of 10 for the STAI - State Anxiety levels was also noted [increase >MCID (n=180) vs.  
32  
33 decrease >MCID (n=50), p-value <0.001] (figure 6). The excess number of participants with increased vs.  
34  
35 decreased anxiety represents 13.8% [(180-50)/937, NNH = 7] of participants with available data. This  
36  
37 change remained significant even if only participant with a negative screen were considered [increase  
38  
39 >MCID (n=129) vs. decrease >MCID (n=40), p-value < 0.0001]. Multivariate regression analysis  
40  
41 demonstrated female gender and increased baseline concern about getting lung cancer to be associated  
42  
43 with increased anxiety following screening (Table 3).  
44  
45  
46  
47  
48  
49

50 **Table 2- HRQoL, and anxiety measures at baseline and at different time-points within the study. Generalized linear**  
51 **mixed model.**  
52  
53  
54  
55  
56  
57



|                                 | Baseline<br>(n=1,237) | 1-month post baseline CT scan<br>Mean, change (95% CI)<br>(n=953) | 12-months after baseline CT<br>Mean, change (95% CI)<br>(n=1066) |
|---------------------------------|-----------------------|-------------------------------------------------------------------|------------------------------------------------------------------|
| EQ VAS <sup>1</sup>             | 76.3                  | 76.8, 0.42 (-1.39 to 2.23)                                        | 76.8, 0.22 (-0.88 to 1.32)                                       |
| EQ-5D-3L index values           | 0.84                  | 0.84, -0.00 (-0.02 to 0.01)                                       | 0.84, -0.00 (-0.01 to 0.01)                                      |
| SF-12: PCS <sup>2</sup>         | 46.1                  | 46.8, 0.61 (-0.15 to 1.37)                                        | 46.4, 0.31 (-0.55 to 1.17)                                       |
| SF-12: MCS <sup>3</sup>         | 51.1                  | 50.9, -0.26 (-1.04 to 0.52)                                       | 51.2, -0.14 (-1.14 to 0.86)                                      |
| STAI-State Anxiety <sup>4</sup> | 30.9                  | <b>33.1, 2.27 (0.57 to 3.96)<sup>5</sup></b>                      | 31.7, 1.11 (-1.11 to 3.33)                                       |

<sup>1</sup> EQ Visual Analogue Scale “We would like to know how good or bad your health is today” (100 – best imaginable, 0 – worst imaginable).

<sup>2</sup> Physical Health Composite Scores (US population mean = 50 +/- 10), with higher score corresponding to better state.

<sup>3</sup> Mental Health Composite Scores (US population mean = 50 +/- 10), with higher score corresponding to better state.

<sup>4</sup> STAI-State score >39 considered clinically significant symptoms.

<sup>5</sup> P-value < 0.05 compared with baseline. Post-estimated marginal means with adjustment for multiple comparison (Bonferroni).

**Table 3-Factor associated with changes in anxiety levels from baseline to 1-month post baseline CT scan.**

|                                                 | Changes in anxiety levels (STAI-S)<br>Beta coefficient (95 % CI) |
|-------------------------------------------------|------------------------------------------------------------------|
| Positive scan results                           | -0.70 (-1.91 to 0.51)                                            |
| Age                                             | -0.09 (-0.18 to 0.01)                                            |
| Females                                         | <b>1.01 (0.02 to 2.16)*</b>                                      |
| Current smokers                                 | 0.57 (-0.50 to 1.64)                                             |
| Pack-years                                      | -0.01 (-0.03 to 0.01)                                            |
| Current alcohol consumption                     | -0.63 (-1.86 to 0.60)                                            |
| Family history of any cancer                    | -1.14 (-2.28 to 0.01)                                            |
| Participants' concern about getting lung cancer |                                                                  |
| All the time                                    | <b>3.79 (0.24 to 7.32)*</b>                                      |
| Often                                           | 1.73 (-0.00 to 3.47)                                             |
| Sometimes                                       | 0.99 (-0.12 to 2.10)                                             |

1  
2  
3  
4  
5  
6 Multivariate regression model with adjustment for scan results, age, gender, race,  
7 smoking status, pack-years, alcohol consumption, education, family history of any  
8 cancer, participants' concern about getting lung cancer at baseline, and for the clustering  
9 of data within 8 study sites. \*p<0.05  
10  
11  
12  
13

#### 14 Twelve-month assessment

15  
16  
17  
18 No statistically significant mean changes in EQ VAS, EQ-5D-3L index values, PCS, or STAI - State  
19  
20 Anxiety levels were detected in participants at the 12 month interview. The proportion of individuals with  
21  
22 deterioration vs. improvement greater than the MCID for the instrument remained significant for the State  
23  
24 anxiety levels [increase >MCID (n=146) vs. decrease >MCID (n=87), p-value <0.0001], representing  
25  
26 5.5% [(146-87)/1066, NNH=18] of participants (figure 6). The proportion of individuals experiencing a  
27  
28 deterioration vs. improvement greater than the MCID for EQ VAS(figure 2), EQ-5D-3L(figure 3),  
29  
30 PCS(figure 4) and MCS(figure 5) were not significantly different.  
31  
32  
33  
34

#### 35 Positive screen and investigation

36  
37  
38  
39 Among participants receiving a positive scan results (n=279), no statistically significant mean changes in  
40  
41 EQ VAS, EQ-5D-3L index values, PCS, or MCS were detected following baseline LDCT (online  
42  
43 Supplementary Table 1). However, more participants experienced a clinically significant increase vs.  
44  
45 decrease in anxiety score [increase >MCID (n= 20) vs. decrease >MCID (n=41), p-value=0.002]  
46  
47 representing 8.8% [(41-20)/238, NNH=11] of these participants (figure 7). This increase persisted at the  
48  
49 12 month interview [increase >MCID (n=14) vs. decrease >MCID (n=35), p-value=0.003] representing  
50  
51 8.5% [(35-14)/246, NNH=12] of participants (figure 8).  
52  
53  
54  
55  
56  
57  
58  
59  
60

1  
2  
3 Following investigation examinations, no statistically significant mean changes in EQ VAS, EQ-5D-3L  
4  
5 index values, PCS, MCS, or anxiety were detected. Post-investigation changes revealed no statistically  
6  
7 significant changes in the proportion of individuals with deterioration vs. improvement greater than the  
8  
9 MCID (figure 7).  
10  
11  
12

13 The proportion of different levels of each questionnaires' dimensions by study visits, as well as number of  
14  
15 missing values, are shown in the online Supplementary Table 2 to 4.  
16  
17  
18  
19  
20  
21  
22  
23  
24  
25  
26  
27  
28  
29  
30  
31  
32  
33  
34  
35  
36  
37  
38  
39  
40  
41  
42  
43  
44  
45  
46  
47  
48  
49  
50  
51  
52  
53  
54  
55  
56  
57

## DISCUSSION

This study offers detailed information on HRQoL and anxiety following LDCT for lung cancer screening in a Canadian high-risk selected population using validated assessment tools measuring overall HRQoL as well as specific physical, psychological and anxiety scores. Our study found no clinically significant differences in HRQoL outcomes between baseline and each of the survey time points following initial screening in the cohort as a whole. However, more participants experienced a clinically significant increased anxiety (vs. decreased) following baseline LDCT. This finding was more pronounced among females and participants who were concerned about getting lung cancer at baseline. Higher anxiety was also more frequent in the subgroup with positive baseline scan, although the impact of scan results did not reach statistical significance in the multivariate analysis. Over the long-term, no adverse effects on HRQoL were noted but some of the excess in increased anxiety levels persisted.

In line with our findings, analyses of other screening cohorts including NLST,[21] NELSON,[22] PLCO,[23] and UKLS,[24] as well as two recent meta-analyses have demonstrated that lung cancer screening is associated with little to no adverse physical or psychological long-term impact on participants[8,25]. While analysis of the Danish Lung Cancer Screening Trial did show negative consequences at 1 year,[26] and 2 year,[27] follow-up, the degree of change was actually greater in the control (no screening) arm of the trial.

Our finding of increased anxiety following a positive screen is in line with those reported in the UKLS,[24] and NLST trials,[21] which observed a short-term increase in distress levels two weeks or 2 months respectively after a positive result notification of baseline screening. Results from NELSON,[28] and from the Pittsburgh Lung Screening Study,[29] also reported a short-term lung cancer-specific

1  
2  
3 distress, a poorer quality of life and a higher level of anxiety among participants with indeterminate scan  
4  
5 results compared with those with negative results. However, in both studies these negative impacts  
6  
7 disappeared over time.  
8  
9

10  
11 Similar to our findings, NELSON study reported a worse HRQoL outcomes among females compared to  
12  
13 males,[28]. Furthermore, our observation regarding females is also consistent with the results of a study of  
14  
15 PLCO participants,[23] that found a poorer MCS outcomes in females compared to males.  
16  
17

18  
19 In most cases reported to date, statistically significant mean changes in HRQoL-related scores detected in  
20  
21 groups of screened individuals have been small and of questionable clinical significance limiting the  
22  
23 impact of such findings in clinical decision-making. Conversely, lack of statistically significant changes in  
24  
25 population means can mask clinically meaningful changes in individuals. The MCID has been suggested  
26  
27 to be a useful benchmark to define the smallest difference in HRQoL that individuals perceive as  
28  
29 beneficial or harmful and that mandates a change in management,[30]. Only two previous lung cancer  
30  
31 screening trial have reported MCID levels to interpret the changes in HRQoL of participants,[22,24,28].  
32  
33 However, both applied this concept to mean population changes rather than to discrete individual changes.  
34  
35 Our study is unique in providing discrete participant data on the proportion of individuals with  
36  
37 improvement vs. deterioration greater than the MCID for each assessment tool. This has allowed us to  
38  
39 attribute to the intervention excess cases of deterioration vs. improvement given normal expected  
40  
41 variations in each individual over time. This is not only helpful in determining if a true clinically  
42  
43 significant impact is present, but also in specifying how many individuals are impacted by such a change,  
44  
45 in order to calculate a “number-needed-to-harm” value. With this approach, we found that the proportion  
46  
47 of individuals with improvement vs. deterioration greater than the MCID for the STAI was significantly  
48  
49 different among all participants with a number needed to harm of 7 in the short term following screening,  
50  
51  
52  
53  
54  
55  
56  
57

1  
2  
3 and 18 at one-year post screening. Our data adds to an evolving body of evidence which suggests that  
4  
5 LDCT screening for lung cancer does not have overall significant negative impacts on the HRQoL of the  
6  
7 population screened. However, a minority of individuals do experience small but clinically significant  
8  
9 increases in anxiety levels following screening.  
10  
11  
12

13 The major strengths of our study include the use of a large multicenter sample of eligible participants, and  
14  
15 reporting of individual participant data using three different and well-established instruments for  
16  
17 measuring HRQoL and anxiety as well as the risk prediction model used for the recruitment,[31]. Another  
18  
19 strength of our study is the longitudinal design with a high follow-up and response rate, which enabled us  
20  
21 to assess short- and long-term outcomes at different time points during screening process with each  
22  
23 participant serving as his/her own control. While we enrolled a high risk cohort using a risk prediction  
24  
25 model, our participants' baseline HRQoL metrics appeared comparable to those of similarly aged  
26  
27 individuals in the general population [Adult aged 55-69; mean EQ VAS: 76,[32] State anxiety: 32.2-  
28  
29 34.5,[15]. Adult aged 50-69; PCS: 50.9-51.3, MCS: 50.7-50.9,[13]] suggesting that our findings could be  
30  
31 generalizable to a broader population of screen-eligible individuals but with lower risk of lung cancer than  
32  
33 in our population.  
34  
35  
36  
37  
38  
39

40 The current study has potential limitations. Our population was made up almost entirely of Caucasians, so  
41  
42 that a differential impact of screening on other ethnic communities cannot be determined. Owing to the  
43  
44 study design for HRQoL assessments, we were unable to address the impacts of incidental findings on  
45  
46 HRQoL and anxiety of participants. Another potential limitation is that we did not compare our results to  
47  
48 an unscreened control group but instead used each participant's baseline scores. As such, other factors  
49  
50 unrelated to the screening intervention, such as aging or changes in smoking status, could affect the  
51  
52 longitudinal changes (or lack thereof) noted in our study,[34]. However, two previous studies with a  
53  
54  
55  
56  
57

1  
2  
3 randomized design and a control group reported the HRQoL results that were comparable to our  
4 findings,[14,20]. Another potential limitation is that the EQ-5D-3L is usually associated with a ceiling  
5 effect (i.e., scores recording perfect health),[35] and has limited ability to determine small changes in  
6 health status compared to the five-level EQ-5D-5L, which might offer improved measure of population-  
7 weighted health state utility,[36,37]. In our study, 35 % of participants reported perfect scores on EQ-5D-  
8 3L at baseline; suggesting a ceiling effect that was adjusted for with a generalized linear mixed modeling  
9 approach,[38]. Moreover, HRQoL in our study was also measured by SF-12, which has been known to  
10 demonstrate a smaller ceiling/floor effect compared to EQ-5D-3L,[35]. In our study, no ceiling/floor  
11 effect was observed for the SF-12 scores. Finally, the statistical power to detect changes in some  
12 participant subgroups such as those with positive screens may be limited because of low number of  
13 participants with a positive scan results. Therefore, caution should be used in drawing conclusions.  
14  
15  
16  
17  
18  
19  
20  
21  
22  
23  
24  
25  
26  
27  
28  
29

30 The complexity of longitudinal analysis of HRQoL and the lack of agreed upon standardized approach  
31 compromise the comparison of results between studies,[39]. Even the specific MCID level for each  
32 instrument can be debated. Ideally such levels are determined in the specific population of interest, but  
33 such information is rarely available. Levels chosen for our analysis were determined prior to any data  
34 analysis based on best evidence for each instrument. As a confirmatory step, MCIDs selected in this study  
35 were found to approximate estimates obtained as half a Standard Deviation (SD) (MID) of HRQoL  
36 measures in our population (results not shown), an alternative distribution-based approach to MCID  
37 determination,[40].  
38  
39  
40  
41  
42  
43  
44  
45  
46  
47  
48

49 The findings of our study corroborate and expand the current evidence-based information on lung cancer  
50 screening decision making by showing that there is a minimal overall psychological impact associated  
51 with lung cancer screening. However, certain populations (i.e., females, participants with higher baseline  
52  
53  
54  
55  
56  
57  
58  
59  
60

1  
2  
3 concern about lung cancer) may be at a higher risk of negative psychological impact. This suggests that an  
4  
5 improved communication is needed throughout the entire lung cancer screening process, especially for the  
6  
7 potentially vulnerable subgroups. Since most positive screens do not result in a lung cancer diagnosis,  
8  
9 approaches to better define screening exam findings and reduce false positive rates could be effective in  
10  
11 reducing the anxiety burden in this subgroup. Despite the high rate of false positive CT results in lung  
12  
13 cancer screening, there is no clear recommendation yet on psychological interventions to help individuals  
14  
15 cope with abnormal CT screening results. However, literature on mammography screening has shown that  
16  
17 immediate follow-up and consultation can significantly reduce anxieties after receiving abnormal  
18  
19 mammograms,[41].  
20  
21  
22  
23  
24

25 In conclusion, our study demonstrated that CT Screening for Lung Cancer has no major impact on  
26  
27 HRQoL among participants overall, but some individuals experience clinically significant increase in  
28  
29 anxiety with a number needed to harm of 18 at one year post initial screen. While these impacts may  
30  
31 appear minor in view of the robust mortality reduction associated with LDCT screening, ongoing work to  
32  
33 further define and minimize these negative aspects of screening is warranted given recommendations for  
34  
35 broad screening of at risk populations in North America.  
36  
37  
38  
39  
40  
41  
42  
43  
44  
45  
46  
47  
48  
49  
50  
51  
52  
53  
54  
55  
56  
57  
58  
59  
60



**Author's contributions:**

AT, SCL, MCT, NT, SC and SAK had full access to all the data in the study and take responsibility for the integrity of the data and the accuracy of the data analysis, including and especially any adverse effects as well as the final version of the manuscript. AMC, PM, SP, MJ, JG, GG, GN, SM, FL, RB, GL, HR, MST, contributed substantially to the study design, data interpretation, and review of the manuscript.

**Conflict of interest**

The authors declare that there is no conflict of interest.

**Funding**

The study was funded by the Terry Fox Research Institute and the Canadian Partnership Against Cancer. Additional research support provided by the Arnie Charbonneau Cancer Institute and the Alberta Cancer Foundation. Primary results of the study have been published previously [11].

**Data Sharing Statement**

No additional unpublished data from the study is made available.

## References

- 1  
2  
3  
4  
5  
6  
7 [1] Brambilla E, Travis WD, Brennan P, et al. Lung cancer. In: Stewart BW, Wild CP, eds. World cancer  
8  
9 report 2014. International Agency for Research on Cancer (2014) 350-361.  
10  
11  
12 [2] National Lung Screening Trial Research Team, Aberle DR, Berg CD, Black WC, et al. The National  
13  
14 Lung Screening Trial: overview and study design. *Radiology* (2011) 258:243-253.  
15  
16  
17  
18 [3] Recommendations on screening for lung cancer. *CMAJ* (2016)188:425-432.  
19  
20  
21 [4] Moyer VA. Screening for lung cancer: U.S. Preventive Services Task Force recommendation  
22  
23 statement. *Ann Intern Med* (2014)160:330-338.  
24  
25  
26  
27 [5] Bach PB, Mirkin JN, Oliver TK. Benefits and harms of CT screening for lung cancer: a systematic  
28  
29 review. *JAMA* (2012) 307:2418-2429.  
30  
31  
32  
33 [6] Patz EF Jr, Pinsky P, Gatsonis C, et al; NLST Overdiagnosis Manuscript Writing Team. Overdiagnosis  
34  
35 in low-dose computed tomography screening for lung cancer. *JAMA Intern Med* (2014)174:269-  
36  
37 274.  
38  
39  
40  
41 [7] Marshall HM, Bowman RV, Yang IA, et al. Screening for lung cancer with low-dose computed  
42  
43 tomography: a review of current status. *J Thorac Dis* (2013) 5 Suppl 5:S524-S539.  
44  
45  
46  
47 [8] Wu GX, Raz DJ, Brown L, et al. Psychological Burden Associated with Lung Cancer Screening: A  
48  
49 Systematic Review. *Clin Lung Cancer* (2016) pii: S1525-7304 (16) 30053-30055.  
50  
51  
52  
53  
54  
55  
56  
57  
58  
59  
60

- 1  
2  
3 [9] Miller AB, Madalinska JB, Church T, et al. Health-related quality of life and cost-effectiveness studies  
4  
5 in the European randomised study of screening for prostate cancer and the US Prostate, Lung,  
6  
7 Colon and Ovary trial. *Eur J Cancer* (2001) 37: 2154-2160.  
8  
9  
10  
11 [10] McWilliams A, Tammemagi MC, Mayo JR, et al. Probability of cancer in pulmonary nodules  
12  
13 detected on first screening CT. *N Engl J Med* (2013) 369:910-919.  
14  
15  
16  
17 [11] Tammemagi MC, Schmidt H, Martel S, et.al. Participant selection for lung cancer screening by risk  
18  
19 modelling (the Pan-Canadian Early Detection of Lung Cancer (PanCan) study): a single-arm,  
20  
21 prospective study. *Lancet Oncol* (2017) pii: S1470-2045(17)30597-1.  
22  
23  
24  
25 [12] Tammemagi MC, Freedman MT, Pinsky PF, et al. Prediction of true positive lung cancers in  
26  
27 individuals with abnormal suspicious chest radiographs: a prostate, lung, colorectal, and ovarian  
28  
29 cancer screening trial study. *J Thorac Oncol* (2009) 4:710-721.  
30  
31  
32  
33 [13] Tremblay A, Taghizadeh N, McWilliams AM, et al. Low Prevalence of High Grade Lesions Detected  
34  
35 with Autofluorescence Bronchoscopy in the Setting of Lung Cancer Screening in the Pan-  
36  
37 Canadian Lung Cancer Screening Study. *Chest* (2016) 150:1015-1022.  
38  
39  
40  
41 [14] Jenkinson C, Layte R, Jenkinson D, et al. A shorter form health survey: can the SF-12 replicate  
42  
43 results from the SF-36 in longitudinal studies? *J Public Health Med* (1997) 19:179-186.  
44  
45  
46  
47 [15] Bansback N Tsuchiya A BJAA. Canadian valuation of EQ-5D health states: preliminary value set and  
48  
49 considerations for future valuation studies. *PLoS One* (2012) 7:e31115. doi:  
50  
51 10.1371/journal.pone.0031115.  
52  
53  
54  
55  
56  
57  
58  
59  
60

- 1  
2  
3 [16] Spielberger CD, Gorsuch RL, Lushene RE. Test manual for the State-Trait Anxiety Inventory. Palo  
4 Alto, CA: Consulting Psychologists Press, 1970.  
5  
6  
7  
8  
9 [17] Zanini A, Aiello M, Adamo D, et al. Estimation of minimal clinically important difference in EQ-5D  
10 visual analog scale score after pulmonary rehabilitation in subjects with COPD. *Respir Care*  
11 (2015) 60:88-95.  
12  
13  
14  
15  
16  
17 [18] Le QA, Doctor JN, Zoellner LA, Feeny NC. Minimal clinically important differences for the EQ-5D  
18 and QWB-SA in Post-traumatic Stress Disorder (PTSD): results from a Doubly Randomized  
19 Preference Trial (DRPT). *Health Qual Life Outcomes* (2013) 11:59.  
20  
21  
22  
23  
24  
25 [19] Parker SL, Godil SS, Shau DN, Mendenhall SK, McGirt MJ. Assessment of the minimum clinically  
26 important difference in pain, disability, and quality of life after anterior cervical discectomy and  
27 fusion: clinical article. *J Neurosurg Spine* (2013)18:154-160.  
28  
29  
30  
31  
32  
33 [20] Corsaletti BF, Proença MGL, Bisca GW, et al. Minimal important difference for anxiety and  
34 depression surveys after intervention to increase daily physical activity in smokers. *Fisioter Pesq*  
35 (2014) 21:359-364.  
36  
37  
38  
39  
40  
41 [21] Gareen IF, Duan F, Greco EM, et al. Impact of lung cancer screening results on participant health-  
42 related quality of life and state anxiety in the National Lung Screening Trial. *Cancer* (2014) 3401-  
43 3409.  
44  
45  
46  
47  
48  
49 [22] Van den Bergh KA, Essink-Bot ML, Borsboom GJ, Scholten ET, van Klaveren RJ, de Koning HJ.  
50 Long-term effects of lung cancer computed tomography screening on health-related quality of life:  
51 the NELSON trial. *Eur Respir J* (2011) 38:154-161.  
52  
53  
54  
55  
56  
57  
58  
59  
60

- 1  
2  
3 [23] Taylor KL, Shelby R, Gelmann E, et al. Quality of life and trial adherence among participants in the  
4 prostate, lung, colorectal, and ovarian cancer screening trial. *J Natl Cancer Inst* (2004) 96: 1083-  
5 1094.  
6  
7  
8  
9  
10  
11 [24] Brain K, Lifford KJ, Carter B, et al. Long-term psychosocial outcomes of low-dose CT screening:  
12 results of the UK Lung Cancer Screening randomised controlled trial. *Thorax* (2016) 71:996-1005.  
13  
14  
15  
16  
17 [25] Slatore CG, Sullivan DR, Pappas M, et al. Patient-centered outcomes among lung cancer screening  
18 recipients with computed tomography: a systematic review. *J Thorac Oncol* (2014) 9:927-934.  
19  
20  
21  
22  
23 [26] Aggestrup LM, Hestbech MS, Siersma V, et al. Psychosocial consequences of allocation to lung  
24 cancer screening: a randomised controlled trial. *BMJ Open* (2012) 1;2:e000663.  
25  
26  
27  
28  
29 [27] Rasmussen JF, Siersma V, Pedersen JH, et al. Psychosocial consequences in the Danish randomised  
30 controlled lung cancer screening trial (DLCST). *Lung Cancer* (2015) 87:65-72.  
31  
32  
33  
34 [28] Van den Bergh KA, Essink-Bot ML, Borsboom GJ, et al. Short-term health-related quality of life  
35 consequences in a lung cancer CT screening trial (NELSON). *British Journal of Cancer* (2010)  
36 102, 27 - 34.  
37  
38  
39  
40  
41  
42 [29] Byrne MM, Weissfeld J, Roberts MS. Anxiety, fear of cancer, and perceived risk of cancer following  
43 lung cancer screening. *Med Decis Making* (2008) 28:917-925.  
44  
45  
46  
47  
48 [30] Jaeschke R, Singer J, Guyatt GH. Measurement of health status. Ascertaining the minimal clinically  
49 important difference. *Control Clin Trials* (1989)10:407-415.  
50  
51  
52  
53  
54  
55  
56  
57

- 1  
2  
3 [31] Tammemagi MC, Katki HA, Hocking WG, et al. Selection criteria for lung-cancer screening. *N Engl*  
4  
5 *J Med* 2013;368:728-736.  
6  
7  
8  
9 [32] Johnson JA, Pickard AS. Comparison of the EQ-5D and SF-12 health surveys in a general population  
10  
11 survey in Alberta, Canada. *Med Care* (2000) 38:115-121.  
12  
13  
14 [33] Mols F, Pelle AJ, Kupper N. Normative data of the SF-12 health survey with validation using  
15  
16 postmyocardial infarction patients in the Dutch population. *Qual Life Res* (2009) 18:403-414.  
17  
18  
19 [34] Hestbech MS, Siersma V, Dirksen A, et al. Participation bias in a randomised trial of screening for  
20  
21 lung cancer. *Lung Cancer* (2011) 73:325-331.  
22  
23  
24  
25 [35] Tramontano AC, Schrag DL, Malin JK, et al. Catalog and comparison of societal preferences  
26  
27 (utilities) for lung cancer health states: results from the Cancer Care Outcomes Research and  
28  
29 Surveillance (CanCORS) study. *Med Decis Making* (2015) 35:371-387.  
30  
31  
32  
33 [36] Pickard AS, De Leon MC, Kohlmann T, et al. Psychometric comparison of the standard EQ-5D to a 5  
34  
35 level version in cancer patients. *Med Care* (2007) 45:259-263.  
36  
37  
38  
39 [37] Wang P, Luo N, Tai ES, et al. The EQ-5D-5L is More Discriminative Than the EQ-5D-3L in Patients  
40  
41 with Diabetes in Singapore. *Value Health Reg Issues* (2016) 9:57-62.  
42  
43  
44  
45 [38] Lo S, Andrews S. To transform or not to transform: using generalized linear mixed models to analyse  
46  
47 reaction time data. *Front Psychol* (2015) 6:1171.  
48  
49  
50  
51 [39] Bonnetain F, Fiteni F, Efficace F, et al. Statistical Challenges in the Analysis of Health-Related  
52  
53 Quality of Life in Cancer Clinical Trials. *J Clin Oncol* (2016) 34:1953-1956.  
54  
55  
56  
57  
58  
59  
60

1  
2  
3 [40] Norman GR, Sloan JA, Wyrwich KW. Interpretation of changes in health-related quality of life: the  
4 remarkable universality of half a standard deviation. *Med Care* (2003) 41:582-592.  
5  
6  
7

8  
9 [41] Barton MB, Morley DS, Moore S, et al. Decreasing women's anxieties after abnormal mammograms:  
10 a controlled trial. *J Natl Cancer Inst* (2004) 96:529-538.  
11  
12  
13  
14  
15  
16  
17  
18  
19  
20  
21  
22  
23  
24  
25  
26  
27  
28  
29  
30  
31  
32  
33  
34  
35  
36  
37  
38  
39  
40  
41  
42  
43  
44  
45  
46  
47  
48  
49  
50  
51  
52  
53  
54  
55  
56  
57  
58  
59  
60

For peer review only

### Figure legends

Figure 1- Assessments of the health-related quality of life (HRQoL) and anxiety in the Pan-Canadian Early Detection of Lung Cancer Study.

Figure 2: Changes in EuroQoL Visual Analog Scale (VAS) from baseline to post baseline CT(A), and 12 months after baseline(B).

Figure 3: Changes in EuroQoL(EQ)-5D-3L from baseline to post baseline CT(A), and 12 months after baseline(B).

Figure 4: Changes in 12-item short-form Physical Component Scale(PCS) from baseline to post baseline CT(A), and 12 months after baseline(B).

Figure 5: Changes in 12-item short-form Mental Component Scale (MCS) from baseline to post baseline CT(A), and 12 months after baseline(B).

Figure 6: Changes in Spielberger State Trait Anxiety Inventory (STAI) from baseline to post baseline CT(A), and 12 months after baseline(B).

Figure 7: Changes in Spielberger State Trait Anxiety Inventory (STAI) from baseline to post baseline CT (A) and post investigation (B) among participants with a positive scan results.

Figure 8: Changes in Spielberger State Trait Anxiety Inventory (STAI) from baseline to 12 months among participants with a positive scan results.



1  
2  
3  
4  
5  
6  
7  
8  
9  
10  
11  
12  
13  
14  
15  
16  
17  
18  
19  
20  
21  
22  
23  
24  
25  
26  
27  
28  
29  
30  
31  
32  
33  
34  
35  
36  
37  
38  
39  
40  
41  
42  
43  
44  
45  
46  
47  
48  
49  
50  
51  
52  
53  
54  
55  
56  
57  
58  
59  
60

**Figure 1- Assessments of the health-related quality of life (HRQoL) and anxiety in the Pan-Canadian Early Detection of Lung Cancer Study.**

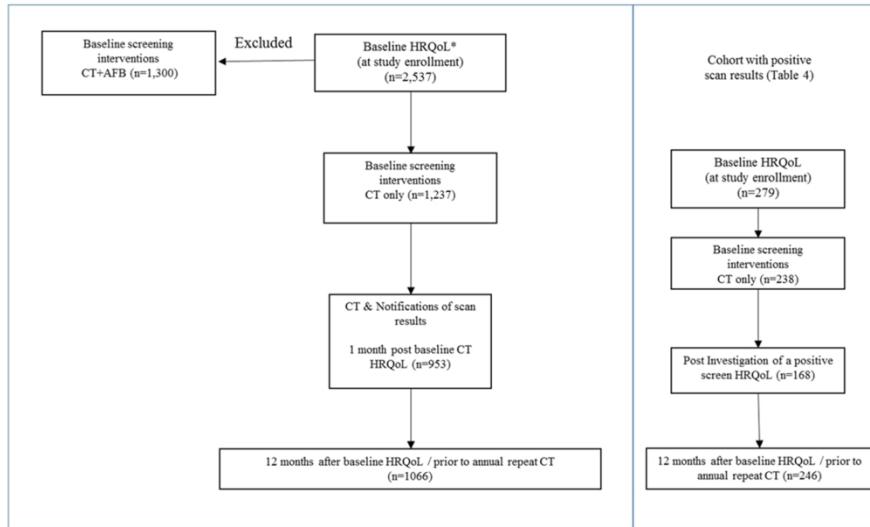

207x146mm (300 x 300 DPI)

Figure 2: Changes in EuroQoL Visual Analog Scale (VAS) from baseline to post baseline CT(A), and 12 months after baseline(B).

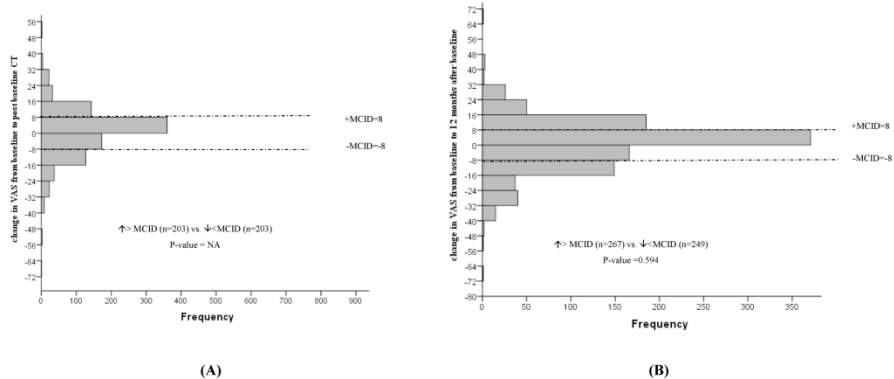

279x361mm (300 x 300 DPI)

1  
2  
3  
4  
5  
6  
7  
8  
9  
10  
11  
12  
13  
14  
15  
16  
17  
18  
19  
20  
21  
22  
23  
24  
25  
26  
27  
28  
29  
30  
31  
32  
33  
34  
35  
36  
37  
38  
39  
40  
41  
42  
43  
44  
45  
46  
47  
48  
49  
50  
51  
52  
53  
54  
55  
56  
57  
58  
59  
60

Figure 3: Changes in EuroQoL(EQ)-5D-3L from baseline to post baseline CT(A), and 12 months after baseline(B).

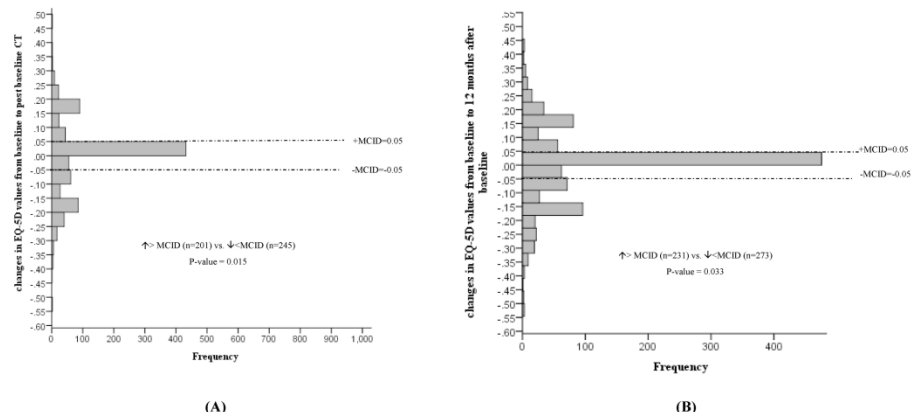

279x361mm (300 x 300 DPI)

Figure 4: Changes in 12-item short-form Physical Component Scale (PCS) from baseline to post baseline CT(A), and 12 months after baseline(B).

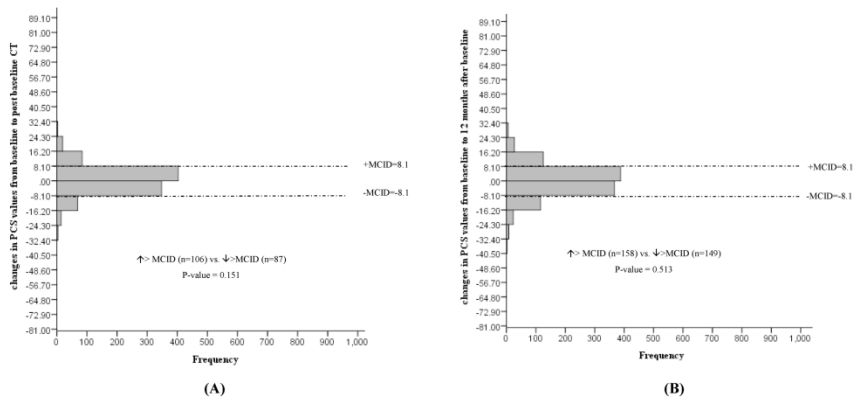

279x361mm (300 x 300 DPI)

1  
2  
3  
4  
5  
6  
7  
8  
9  
10  
11  
12  
13  
14  
15  
16  
17  
18  
19  
20  
21  
22  
23  
24  
25  
26  
27  
28  
29  
30  
31  
32  
33  
34  
35  
36  
37  
38  
39  
40  
41  
42  
43  
44  
45  
46  
47  
48  
49  
50  
51  
52  
53  
54  
55  
56  
57  
58  
59  
60

Figure 5: Changes in 12-item short-form Mental Component Scale (MCS) from baseline to post baseline CT(A), and 12 months after baseline(B).

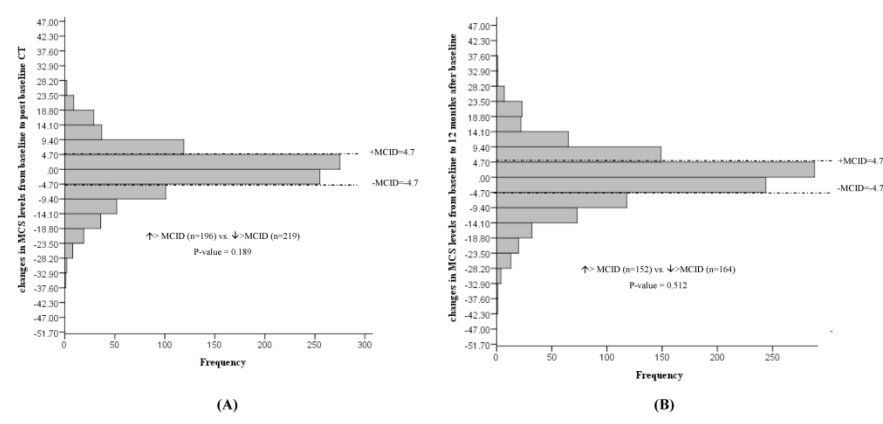

279x361mm (300 x 300 DPI)

Figure 6: Changes in Spielberger State Trait Anxiety Inventory (STAI) from baseline to post baseline CT(A), and 12 months after baseline(B).

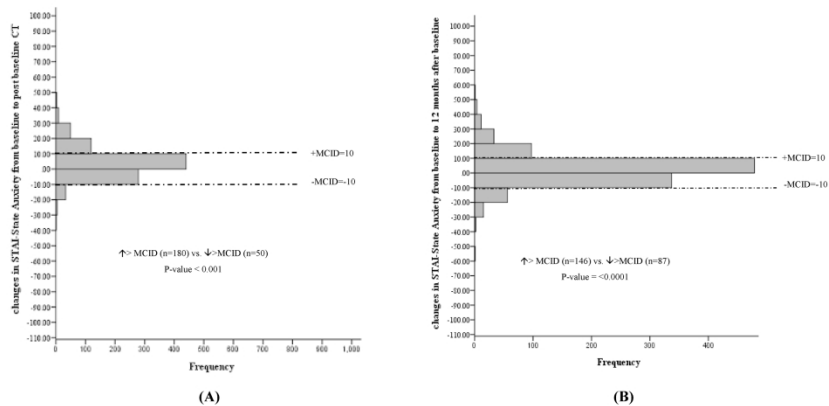

279x361mm (300 x 300 DPI)

1  
2  
3  
4  
5  
6  
7  
8  
9  
10  
11  
12  
13  
14  
15  
16  
17  
18  
19  
20  
21  
22  
23  
24  
25  
26  
27  
28  
29  
30  
31  
32  
33  
34  
35  
36  
37  
38  
39  
40  
41  
42  
43  
44  
45  
46  
47  
48  
49  
50  
51  
52  
53  
54  
55  
56  
57  
58  
59  
60

Figure 7: Changes in Spielberger State Trait Anxiety Inventory (STAI) from baseline to post baseline CT (A) and post investigation (B) among participants with a positive scan results.

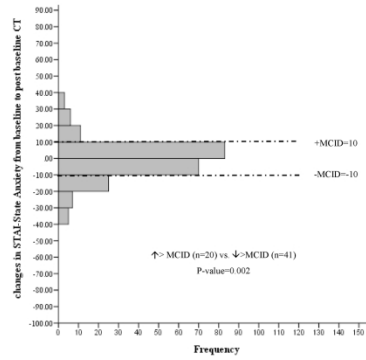

(A)

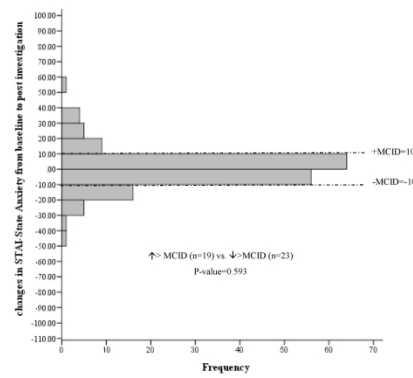

(B)

279x361mm (300 x 300 DPI)

1  
2  
3  
4  
5  
6  
7  
8  
9  
10  
11  
12  
13  
14  
15  
16  
17  
18  
19  
20  
21  
22  
23  
24  
25  
26  
27  
28  
29  
30  
31  
32  
33  
34  
35  
36  
37  
38  
39  
40  
41  
42  
43  
44  
45  
46  
47  
48  
49  
50  
51  
52  
53  
54  
55  
56  
57  
58  
59  
60

Figure 8: Changes in Spielberger State Trait Anxiety Inventory (STAI) from baseline to 12 months among participants with a positive scan results.

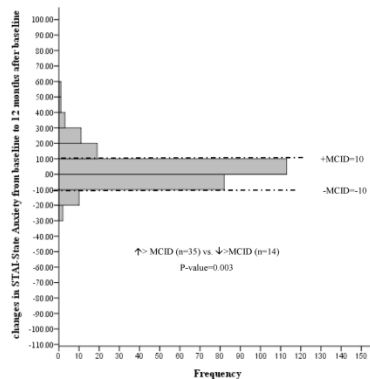

279x361mm (300 x 300 DPI)



## Health-Related Quality of Life and Anxiety in the PAN-CAN Lung Cancer Screening Study

Niloofar Taghizadeh<sup>1</sup>, Alain Tremblay<sup>1</sup>, Sonya Cressman<sup>2</sup>, Stuart Peacock<sup>2</sup>, Annette M. McWilliams<sup>3</sup>, Paul MacEachern<sup>1</sup>, Michael Johnston<sup>4</sup>, John Goffin<sup>5</sup>, Glen Goss<sup>6</sup>, Garth Nicholas<sup>6</sup>, Simon Martel<sup>7</sup>, Francis Laberge<sup>7</sup>, Rick Bhatia<sup>8</sup>, Geoffrey Liu<sup>9</sup>, Heidi Roberts<sup>9</sup>, Martin C. Tammemagi<sup>10</sup>, Sukhinder Atkar-Khattra<sup>2</sup>, Ming-Sound Tsao<sup>9</sup>, Stephen C. Lam<sup>2</sup>, for the Pan-Canadian Early Lung Cancer Study Group.

For peer review only

## e-Appendix 1:

### Study design and population

Institutional Review Board (IRB) Approvals:

Vancouver: UBC BCCA Research Ethics Board (UBC BCCA REB) H08-01132

Calgary: Conjoint Health Research Ethics Board (CHREB) ethics ID: 21852

Hamilton: McMaster University Research Ethics Board; ID: 08-367

Toronto: University Health Network Research Ethics Board; ID: 08-0576-C

Ottawa: The Ottawa Hospital Research Ethics Board; ID 2008581-01H

Quebec: Institute Universitaire de Cardiologie et de Pneumologie; ID: CER: 20319

Halifax: Capital Health Research Ethics Board; ID: CDHA-RS/2009-097

St.John's: Eastern Health Department of Researrch/Knowledge transfer; ID; HIC#10.070

**Supplementary Table 1 – HRQoL, and anxiety levels in participants with positive baseline LDCT.**

|                                           | <b>Baseline<br/>(n=279)</b> | <b>1-month post baseline CT<br/>scan<br/>Mean, change (95% CI)<br/>(n=238)</b> | <b>Post investigation<br/>Mean, change (95% CI)<br/>(n=168)</b> | <b>12-months after baseline<br/>Mean, change (95% CI)<br/>(n= 246)</b> |
|-------------------------------------------|-----------------------------|--------------------------------------------------------------------------------|-----------------------------------------------------------------|------------------------------------------------------------------------|
| <b>EQ VAS<sup>1</sup></b>                 | 76.2                        | 76.1, -0.21 (-2.54 to 2.13)                                                    | 76.9, 0.89 (-3.28 to 5.07)                                      | 76.4, 0.19 (-1.73 to 2.11)                                             |
| <b>EQ-5D-3L index<br/>values</b>          | 0.84                        | 0.84, -0.00 (-0.03 to 0.03)                                                    | 0.85, 0.00 (-0.03 to 0.04)                                      | 0.83, -0.01 (-0.05 to 0.02)                                            |
| <b>SF-12: PCS<sup>2</sup></b>             | 46.2                        | 46.5, 0.22 (-0.83 to 1.28)                                                     | 46.6, 0.45 (-0.93 to 1.83)                                      | 45.3, -0.86 (-1.90 to 1.67)                                            |
| <b>SF-12: MCS<sup>3</sup></b>             | 51.3                        | 51.2, 0.01 (-1.66 to 1.67)                                                     | 51.4, 0.54 (-2.06 to 3.15)                                      | 51.3, 0.01 (-2.30 to 2.33)                                             |
| <b>STAI-State<br/>Anxiety<sup>4</sup></b> | 29.9                        | 33.2, 3.28 (-0.42 to 6.97)                                                     | 32.9, 2.42 (-1.14 to 5.99)                                      | 31.7, 1.79 (-0.62 to 4.19)                                             |

<sup>1</sup>EQ Visual Analogue Scale “We would like to know how good or bad your health is today” (100 – best imaginable, 0 – worst imaginable).

<sup>2</sup> Physical Health Composite Scores (US population mean = 50 +/- 10), with higher score corresponding to better state.

<sup>3</sup> Mental Health Composite Scores (US population mean = 50 +/- 10), with higher score corresponding to better state.

<sup>4</sup> STAI-State score >39 considered clinically significant symptoms.

**Supplementary Table 2 - Proportion of different levels of EQ-5D-3L dimensions by study visits (Total n=1237).**

| EQ-5D-3L Dimensions                                      | Baseline (n=1237) | 1 month post baseline CT scan (n=953) | 12 months after baseline (n=1066) |
|----------------------------------------------------------|-------------------|---------------------------------------|-----------------------------------|
| <b>Mobility</b>                                          |                   |                                       |                                   |
| I have no problems in walking about                      | 918 (74.2)        | 705 (74.0)                            | 782 (73.4)                        |
| I have some problems in walking about                    | 311 (25.2)        | 240 (25.2)                            | 278 (26.1)                        |
| I am confined to bed                                     | 4 (0.3)           | 3 (0.3)                               | 0 (0.0)                           |
| Missing                                                  | 4 (0.3)           | 5 (0.5)                               | 6 (0.6)                           |
| <b>Self-care</b>                                         |                   |                                       |                                   |
| I have no problems with self-care                        | 1191 (96.2)       | 914 (95.9)                            | 1018 (95.5)                       |
| I have some problems washing or dressing myself          | 36 (2.9)          | 31 (3.3)                              | 39 (3.7)                          |
| I am unable to wash or dress myself                      | 7 (0.6)           | 2 (0.2)                               | 3 (0.3)                           |
| Missing                                                  | 3 (0.3)           | 6 (0.6)                               | 6 (0.6)                           |
| <b>Usual activities</b>                                  |                   |                                       |                                   |
| I have no problems with performing my usual activities   | 930 (75.1)        | 710 (74.5)                            | 785 (73.6)                        |
| I have some problems with performing my usual activities | 284 (22.9)        | 228 (23.9)                            | 261 (24.5)                        |
| I am unable to perform my usual activities               | 18 (1.5)          | 8 (0.8)                               | 15 (1.4)                          |
| Missing                                                  | 5 (0.5)           | 7 (0.7)                               | 5 (0.5)                           |
| <b>Pain/discomfort</b>                                   |                   |                                       |                                   |
| I have no pain or discomfort                             | 575 (46.4)        | 471 (49.4)                            | 498 (46.7)                        |
| I have moderate pain or discomfort                       | 622 (50.2)        | 443 (46.5)                            | 520 (48.8)                        |
| I have extreme pain or discomfort                        | 36 (2.9)          | 33 (3.5)                              | 40 (3.8)                          |
| Missing                                                  | 4 (0.4)           | 6 (0.6)                               | 8 (0.8)                           |
| <b>Anxiety/depression</b>                                |                   |                                       |                                   |
| I am not anxious or depressed                            | 835 (64.4)        | 610 (64.0)                            | 708 (66.4)                        |
| I am moderately anxious or depressed                     | 375 (30.3)        | 307 (32.2)                            | 332 (31.1)                        |
| I am extremely anxious or depressed                      | 23 (1.9)          | 28 (2.9)                              | 19 (1.8)                          |
| Missing                                                  | 4 (0.4)           | 8 (0.8)                               | 7 (0.7)                           |

Supplementary Table 3- Proportion of different levels of SF\_12 dimensions by study visits (Total n=2537).

| SF_12 Dimensions                                           | Baseline (n=1237) | 1 month post baseline CT scan (n=953) | 12 months after baseline (n=1066) |
|------------------------------------------------------------|-------------------|---------------------------------------|-----------------------------------|
| <b>General health, n (%)</b>                               |                   |                                       |                                   |
| Excellent                                                  | 93 (7.5)          | 85 (8.9)                              | 89 (8.3)                          |
| Very good                                                  | 453 (36.6)        | 367 (38.5)                            | 392 (36.8)                        |
| Good                                                       | 532 (43.0)        | 381 (40.0)                            | 450 (42.2)                        |
| Fair                                                       | 138 (11.1)        | 105 (11.0)                            | 108 (10.1)                        |
| Poor                                                       | 18 (1.5)          | 12 (1.3)                              | 20 (1.9)                          |
| Missing                                                    | 3 (0.3)           | 3 (0.3)                               | 7 (0.7)                           |
| <b>Moderate activities</b>                                 |                   |                                       |                                   |
| Yes, limited a lot                                         | 97 (7.8)          | 77 (8.1)                              | 75 (7.0)                          |
| Yes, limited a little                                      | 310 (25.0)        | 256 (26.9)                            | 267 (25.0)                        |
| No, not limited at all                                     | 827 (66.8)        | 617 (64.7)                            | 714 (67.0)                        |
| Missing                                                    | 3 (0.3)           | 3 (0.3)                               | 10 (0.9)                          |
| <b>Climbing several flights of stairs</b>                  |                   |                                       |                                   |
| Yes, limited a lot                                         | 191 (15.4)        | 140 (14.7)                            | 161 (15.1)                        |
| Yes, limited a little                                      | 551 (44.5)        | 432 (45.3)                            | 462 (43.3)                        |
| No, not limited at all                                     | 491 (39.7)        | 376 (39.5)                            | 436 (40.9)                        |
| Missing                                                    | 4 (0.3)           | 5 (0.5)                               | 7 (0.7)                           |
| <b>Accomplished less than you would like (physically)</b>  |                   |                                       |                                   |
| Yes                                                        | 335 (27.1)        | 221 (23.2)                            | 265 (24.9)                        |
| No                                                         | 899 (72.6)        | 727 (76.3)                            | 795 (74.6)                        |
| Missing                                                    | 3 (0.3)           | 5 (0.5)                               | 6 (0.6)                           |
| <b>Limited in kind of activities</b>                       |                   |                                       |                                   |
| Yes                                                        | 299 (24.2)        | 221 (23.2)                            | 265 (24.9)                        |
| No                                                         | 934 (75.4)        | 729 (76.5)                            | 795 (74.6)                        |
| Missing                                                    | 4 (0.4)           | 3 (0.3)                               | 6 (0.6)                           |
| <b>Accomplished less than you would like (emotionally)</b> |                   |                                       |                                   |
| Yes                                                        | 251 (20.3)        | 212 (22.2)                            | 222 (20.8)                        |
| No                                                         | 982 (79.3)        | 735 (77.1)                            | 833 (78.1)                        |
| Missing                                                    | 4 (0.4)           | 6 (0.6)                               | 11 (1.0)                          |
| <b>Did not do activities as carefully as usual</b>         |                   |                                       |                                   |
| Yes                                                        | 215 (17.4)        | 181 (19.0)                            | 181 (17.0)                        |
| No                                                         | 1018 (82.2)       | 764 (80.2)                            | 875 (82.1)                        |
| Missing                                                    | 4 (0.4)           | 8 (0.8)                               | 10 (0.9)                          |
| <b>Pain interferes with normal work</b>                    |                   |                                       |                                   |
| Not at all                                                 | 596 (48.1)        | 479 (50.3)                            | 515 (48.3)                        |
| A little bit                                               | 312 (25.2)        | 243 (25.5)                            | 288 (27.0)                        |
| Moderately                                                 | 194 (15.7)        | 138 (14.5)                            | 142 (13.3)                        |
| Quite a bit                                                | 109 (8.8)         | 77 (8.1)                              | 98 (9.2)                          |
| Extremely                                                  | 20 (1.6)          | 13 (1.4)                              | 18 (1.7)                          |
| Missing                                                    | 6 (0.5)           | 3 (0.3)                               | 5 (0.5)                           |
| <b>Felt calm and peaceful</b>                              |                   |                                       |                                   |
| All of the time                                            | 87 (7.0)          | 73 (7.7)                              | 84 (7.9)                          |
| Most of the time                                           | 630 (50.9)        | 460 (48.3)                            | 527 (49.4)                        |
| A good bit of the time                                     | 184 (14.9)        | 163 (17.1)                            | 176 (16.5)                        |
| Some of the time                                           | 214 (17.3)        | 171 (17.9)                            | 164 (15.4)                        |
| A little of the time                                       | 96 (7.8)          | 70 (7.3)                              | 88 (8.3)                          |
| None of the time                                           | 23 (1.9)          | 11 (1.2)                              | 18 (1.7)                          |
| Missing                                                    | 3 (0.3)           | 5 (0.5)                               | 9 (0.8)                           |
| <b>Have a lot of energy</b>                                |                   |                                       |                                   |
| All of the time                                            | 36 (2.9)          | 36 (3.8)                              | 41 (3.8)                          |
| Most of the time                                           | 416 (33.6)        | 317 (33.3)                            | 375 (35.2)                        |
| A good bit of the time                                     | 263 (21.2)        | 206 (21.6)                            | 213 (20.0)                        |
| Some of the time                                           | 322 (26.0)        | 240 (25.2)                            | 249 (23.4)                        |
| A little of the time                                       | 156 (12.6)        | 116 (12.2)                            | 145 (13.6)                        |
| None of the time                                           | 41 (3.3)          | 34 (3.6)                              | 34 (3.2)                          |
| Missing                                                    | 3 (0.3)           | 4 (0.4)                               | 9 (0.8)                           |
| <b>Felt downhearted and blue</b>                           |                   |                                       |                                   |
| All of the time                                            | 4 (0.3)           | 5 (0.5)                               | 4 (0.4)                           |
| Most of the time                                           | 37 (3.0)          | 37 (3.9)                              | 34 (3.2)                          |
| A good bit of the time                                     | 79 (6.4)          | 51 (5.4)                              | 76 (7.1)                          |
| Some of the time                                           | 273 (22.1)        | 196 (20.6)                            | 216 (20.3)                        |
| A little of the time                                       | 480 (38.8)        | 399 (41.9)                            | 414 (38.8)                        |
| None of the time                                           | 361 (29.2)        | 261 (27.4)                            | 312 (29.3)                        |
| Missing                                                    | 3 (0.3)           | 4 (0.4)                               | 10 (0.9)                          |
| <b>Health interferes/social activities</b>                 |                   |                                       |                                   |
| All of the time                                            | 8 (0.6)           | 10 (1.0)                              | 16 (1.5)                          |
| Most of the time                                           | 63 (5.1)          | 42 (4.4)                              | 54 (5.1)                          |
| Some of the time                                           | 203 (16.4)        | 150 (15.7)                            | 169 (15.9)                        |
| A little of the time                                       | 238 (19.2)        | 182 (19.1)                            | 200 (18.8)                        |
| None of the time                                           | 722 (58.3)        | 565 (59.3)                            | 617 (57.9)                        |
| Missing                                                    | 3 (0.3)           | 4 (0.4)                               | 10 (0.9)                          |

**Supplementary Table 4- Proportion of different levels of State anxiety dimensions by study visits (Total n=2537).**

1  
2  
3  
4  
5  
6  
7  
8  
9  
10  
11  
12  
13  
14  
15  
16  
17  
18  
19  
20  
21  
22  
23  
24  
25  
26  
27  
28  
29  
30  
31  
32  
33  
34  
35  
36  
37  
38  
39  
40  
41  
42  
43  
44  
45  
46  
47

| State<br>Dimensions                                  | Baseline<br>(n=1237) |            |               |              |         | 1 month post baseline CT scan<br>(n=953) |            |               |              |         | 12 months after baseline (n=1066) |            |               |              |          |
|------------------------------------------------------|----------------------|------------|---------------|--------------|---------|------------------------------------------|------------|---------------|--------------|---------|-----------------------------------|------------|---------------|--------------|----------|
|                                                      | Not at all           | Somewhat   | Moderately so | Very much so | Missing | Not at all                               | Somewhat   | Moderately so | Very much so | Missing | Not at all                        | Somewhat   | Moderately so | Very much so | Missing  |
| 1 feel calm                                          | 17 (1.4)             | 167 (13.5) | 407 (32.9)    | 643 (51.9)   | 3 (0.3) | 31 (3.3)                                 | 136 (14.3) | 338 (35.5)    | 442 (46.4)   | 6 (0.6) | 18 (1.7)                          | 131 (12.3) | 393 (36.9)    | 516 (48.4)   | 8 (0.8)  |
| 2 feel secure                                        | 16 (1.3)             | 106 (8.6)  | 304 (24.6)    | 808 (65.3)   | 3 (0.3) | 21 (2.2)                                 | 115 (12.1) | 283 (29.7)    | 528 (55.4)   | 6 (0.6) | 24 (2.3)                          | 83 (7.8)   | 330 (31.0)    | 621 (58.3)   | 8 (0.8)  |
| 3 feel tense                                         | 685 (55.3)           | 319 (25.8) | 192 (15.5)    | 36 (2.9)     | 3 (0.3) | 465 (48.8)                               | 300 (31.5) | 144 (15.1)    | 39 (4.1)     | 5 (0.5) | 562 (52.7)                        | 282 (26.5) | 177 (16.6)    | 35 (3.3)     | 10 (1.0) |
| 4 feel strained                                      | 834 (67.4)           | 231 (18.7) | 131 (10.6)    | 38 (3.1)     | 3 (0.3) | 543 (57.0)                               | 261 (27.4) | 109 (11.4)    | 35 (3.7)     | 5 (0.5) | 652 (61.2)                        | 240 (22.5) | 134 (12.6)    | 33 (3.1)     | 7 (0.7)  |
| 5 feel at ease                                       | 41 (3.3)             | 154 (12.4) | 361 (29.2)    | 678 (54.8)   | 3 (0.3) | 45 (4.7)                                 | 154 (16.2) | 289 (30.3)    | 460 (48.3)   | 5 (0.5) | 27 (2.5)                          | 170 (15.9) | 323 (30.3)    | 538 (50.5)   | 8 (0.8)  |
| 6 feel upset                                         | 1003 (81.0)          | 137 (11.1) | 75 (6.1)      | 19 (1.5)     | 3 (0.3) | 660 (69.3)                               | 182 (19.1) | 78 (8.2)      | 28 (2.9)     | 5 (0.5) | 792 (74.3)                        | 175 (16.4) | 75 (7.0)      | 16 (1.5)     | 8 (0.8)  |
| 7 am presently worrying<br>over possible misfortunes | 694 (56.1)           | 332 (26.8) | 156 (12.6)    | 52 (4.2)     | 3 (0.3) | 480 (50.4)                               | 295 (31.0) | 121 (12.7)    | 52 (5.5)     | 5 (0.5) | 555 (52.1)                        | 339 (31.8) | 115 (10.8)    | 49 (4.6)     | 8 (0.8)  |
| 8 feel satisfied                                     | 36 (2.9)             | 193 (15.6) | 469 (37.9)    | 536 (43.3)   | 3 (0.3) | 47 (4.9)                                 | 167 (17.5) | 324 (34.0)    | 410 (43.0)   | 5 (0.5) | 33 (3.1)                          | 192 (18.0) | 378 (35.5)    | 456 (42.8)   | 7 (0.7)  |
| 9 feel frightened                                    | 1008 (81.4)          | 149 (12.0) | 56 (4.5)      | 21 (1.7)     | 3 (0.3) | 718 (75.3)                               | 150 (15.7) | 59 (6.2)      | 21 (2.2)     | 5 (0.5) | 846 (79.4)                        | 148 (13.9) | 53 (5.0)      | 11 (1.0)     | 8 (0.8)  |
| 10 feel comfortable                                  | 30 (2.4)             | 133 (10.7) | 352 (28.4)    | 719 (58.1)   | 3 (0.3) | 31 (3.3)                                 | 135 (14.2) | 291 (30.5)    | 490 (51.4)   | 6 (0.6) | 23 (2.2)                          | 142 (13.3) | 333 (31.2)    | 561 (52.6)   | 7 (0.7)  |
| 11 feel self-confident                               | 36 (2.9)             | 127 (10.3) | 439 (35.5)    | 632 (51.1)   | 3 (0.3) | 38 (4.0)                                 | 106 (11.1) | 359 (37.7)    | 445 (46.7)   | 5 (0.5) | 24 (2.3)                          | 127 (11.9) | 394 (37.0)    | 514 (48.2)   | 7 (0.7)  |
| 12 feel nervous                                      | 780 (63.0)           | 308 (24.9) | 117 (9.5)     | 29 (2.3)     | 3 (0.3) | 559 (58.7)                               | 255 (26.8) | 99 (10.4)     | 35 (3.7)     | 5 (0.5) | 662 (62.1)                        | 261 (24.5) | 114 (10.7)    | 22 (2.1)     | 7 (0.7)  |
| 13 am jittery                                        | 968 (78.2)           | 174 (14.1) | 73 (5.9)      | 18 (1.5)     | 4 (0.4) | 692 (72.6)                               | 152 (15.9) | 77 (8.1)      | 27 (2.8)     | 5 (0.5) | 811 (76.1)                        | 155 (14.5) | 77 (7.2)      | 15 (1.4)     | 8 (0.8)  |
| 14 feel indecisive                                   | 846 (68.3)           | 269 (21.7) | 97 (7.8)      | 22 (1.8)     | 3 (0.3) | 557 (58.4)                               | 246 (25.8) | 113 (11.9)    | 32 (3.4)     | 5 (0.5) | 662 (62.1)                        | 256 (24.0) | 100 (9.4)     | 39 (3.7)     | 9 (0.9)  |
| 15 am relaxed                                        | 48 (3.9)             | 181 (14.6) | 394 (31.8)    | 611 (49.4)   | 3 (0.3) | 52 (5.5)                                 | 173 (18.2) | 313 (32.8)    | 409 (42.9)   | 6 (0.6) | 30 (2.8)                          | 172 (16.1) | 377 (35.4)    | 480 (45.0)   | 7 (0.7)  |
| 16 feel content                                      | 48 (3.9)             | 161 (13.0) | 436 (35.2)    | 589 (47.6)   | 3 (0.3) | 52 (5.5)                                 | 147 (15.4) | 339 (35.6)    | 410 (43.0)   | 5 (0.5) | 37 (3.5)                          | 151 (14.2) | 408 (38.3)    | 463 (43.4)   | 7 (0.7)  |
| 17 am worried                                        | 651 (52.6)           | 390 (31.5) | 146 (11.8)    | 47 (3.8)     | 3 (0.3) | 423 (44.4)                               | 333 (34.9) | 134 (14.1)    | 58 (6.1)     | 5 (0.5) | 518 (48.6)                        | 361 (33.9) | 129 (12.1)    | 51 (4.8)     | 7 (0.7)  |
| 18 feel confused                                     | 1075 (86.8)          | 112 (9.0)  | 32 (2.6)      | 12 (1.0)     | 6 (0.5) | 755 (79.2)                               | 135 (14.2) | 40 (4.2)      | 18 (1.9)     | 5 (0.5) | 887 (83.2)                        | 99 (9.3)   | 50 (4.7)      | 20 (1.9)     | 10 (1.0) |
| 19 feel steady                                       | 43 (3.5)             | 141 (11.4) | 327 (26.4)    | 720 (58.2)   | 6 (0.5) | 43 (4.5)                                 | 126 (13.2) | 272 (28.5)    | 507 (53.2)   | 5 (0.5) | 41 (3.8)                          | 120 (11.3) | 316 (29.6)    | 581 (54.5)   | 8 (0.8)  |
| 20 feel pleasant                                     | 25 (2.0)             | 118 (9.5)  | 416 (33.6)    | 672 (54.3)   | 6 (0.5) | 30 (3.1)                                 | 117 (12.3) | 319 (33.5)    | 482 (50.6)   | 5 (0.5) | 25 (2.3)                          | 115 (10.8) | 365 (34.2)    | 552 (51.8)   | 9 (0.9)  |

1 STROBE Statement—Checklist of items that should be included in reports of *cohort studies*

| PAGE  |                              | Item No | Recommendation                                                                                                                                                                                    |
|-------|------------------------------|---------|---------------------------------------------------------------------------------------------------------------------------------------------------------------------------------------------------|
| 4     | <b>Title and abstract</b>    | 1       | (a) Indicate the study's design with a commonly used term in the title or the abstract                                                                                                            |
| 4     |                              |         | (b) Provide in the abstract an informative and balanced summary of what was done and what was found                                                                                               |
|       | <b>Introduction</b>          |         |                                                                                                                                                                                                   |
| 6     | Background/rationale         | 2       | Explain the scientific background and rationale for the investigation being reported                                                                                                              |
| 7     | Objectives                   | 3       | State specific objectives, including any prespecified hypotheses                                                                                                                                  |
|       | <b>Methods</b>               |         |                                                                                                                                                                                                   |
| 8     | Study design                 | 4       | Present key elements of study design early in the paper                                                                                                                                           |
| 8     | Setting                      | 5       | Describe the setting, locations, and relevant dates, including periods of recruitment, exposure, follow-up, and data collection                                                                   |
| 8     | Participants                 | 6       | (a) Give the eligibility criteria, and the sources and methods of selection of participants. Describe methods of follow-up                                                                        |
| n/a   |                              |         | (b) For matched studies, give matching criteria and number of exposed and unexposed                                                                                                               |
| 8-9   | Variables                    | 7       | Clearly define all outcomes, exposures, predictors, potential confounders, and effect modifiers. Give diagnostic criteria, if applicable                                                          |
| 9     | Data sources/<br>measurement | 8*      | For each variable of interest, give sources of data and details of methods of assessment (measurement). Describe comparability of assessment methods if there is more than one group              |
| n.a.  | Bias                         | 9       | Describe any efforts to address potential sources of bias                                                                                                                                         |
| 11    | Study size                   | 10      | Explain how the study size was arrived at                                                                                                                                                         |
| 10    | Quantitative variables       | 11      | Explain how quantitative variables were handled in the analyses. If applicable, describe which groupings were chosen and why                                                                      |
| 10    | Statistical methods          | 12      | (a) Describe all statistical methods, including those used to control for confounding                                                                                                             |
| 10    |                              |         | (b) Describe any methods used to examine subgroups and interactions                                                                                                                               |
| 10    |                              |         | (c) Explain how missing data were addressed                                                                                                                                                       |
| 10    |                              |         | (d) If applicable, explain how loss to follow-up was addressed                                                                                                                                    |
| n/a   |                              |         | (e) Describe any sensitivity analyses                                                                                                                                                             |
|       | <b>Results</b>               |         |                                                                                                                                                                                                   |
| 12    | Participants                 | 13*     | (a) Report numbers of individuals at each stage of study—eg numbers potentially eligible, examined for eligibility, confirmed eligible, included in the study, completing follow-up, and analysed |
| n.a.  |                              |         | (b) Give reasons for non-participation at each stage                                                                                                                                              |
| FIG 1 |                              |         | (c) Consider use of a flow diagram                                                                                                                                                                |
| 12    | Descriptive data             | 14*     | (a) Give characteristics of study participants (eg demographic, clinical, social) and information on exposures and potential confounders                                                          |
| 14    |                              |         | (b) Indicate number of participants with missing data for each variable of interest                                                                                                               |
| n.a.  |                              |         | (c) Summarise follow-up time (eg, average and total amount)                                                                                                                                       |
| 14-17 | Outcome data                 | 15*     | Report numbers of outcome events or summary measures over time                                                                                                                                    |
| 14-17 | Main results                 | 16      | (a) Give unadjusted estimates and, if applicable, confounder-adjusted estimates and their precision (eg, 95% confidence interval). Make clear                                                     |

|                          |                  |    |                                                                                                                                                                            |
|--------------------------|------------------|----|----------------------------------------------------------------------------------------------------------------------------------------------------------------------------|
|                          |                  |    | which confounders were adjusted for and why they were included                                                                                                             |
|                          | n.a.             |    | (b) Report category boundaries when continuous variables were categorized                                                                                                  |
|                          | 14, 16           |    | (c) If relevant, consider translating estimates of relative risk into absolute risk for a meaningful time period                                                           |
| Suppl                    | Other analyses   | 17 | Report other analyses done—eg analyses of subgroups and interactions, and sensitivity analyses                                                                             |
| <b>Discussion</b>        |                  |    |                                                                                                                                                                            |
| 18                       | Key results      | 18 | Summarise key results with reference to study objectives                                                                                                                   |
| 20                       | Limitations      | 19 | Discuss limitations of the study, taking into account sources of potential bias or imprecision. Discuss both direction and magnitude of any potential bias                 |
| 21-22                    | Interpretation   | 20 | Give a cautious overall interpretation of results considering objectives, limitations, multiplicity of analyses, results from similar studies, and other relevant evidence |
| 22                       | Generalisability | 21 | Discuss the generalisability (external validity) of the study results                                                                                                      |
| <b>Other information</b> |                  |    |                                                                                                                                                                            |
| 23                       | Funding          | 22 | Give the source of funding and the role of the funders for the present study and, if applicable, for the original study on which the present article is based              |

\*Give information separately for exposed and unexposed groups.

**Note:** An Explanation and Elaboration article discusses each checklist item and gives methodological background and published examples of transparent reporting. The STROBE checklist is best used in conjunction with this article (freely available on the Web sites of PLoS Medicine at <http://www.plosmedicine.org/>, Annals of Internal Medicine at <http://www.annals.org/>, and Epidemiology at <http://www.epidem.com/>). Information on the STROBE Initiative is available at <http://www.strobe-statement.org>.



# BMJ Open

## Health-Related Quality of Life and Anxiety in the PAN-CAN Lung Cancer Screening Cohort

|                                 |                                                                                                                                                                                                                                                                                                                                                                                                                                                                                                                                                                                                                                                                                                                                                                                                                                                                                                                                                                                                                                                                                                                                                                                                                                                                                                                                                                                                                                                                                                      |
|---------------------------------|------------------------------------------------------------------------------------------------------------------------------------------------------------------------------------------------------------------------------------------------------------------------------------------------------------------------------------------------------------------------------------------------------------------------------------------------------------------------------------------------------------------------------------------------------------------------------------------------------------------------------------------------------------------------------------------------------------------------------------------------------------------------------------------------------------------------------------------------------------------------------------------------------------------------------------------------------------------------------------------------------------------------------------------------------------------------------------------------------------------------------------------------------------------------------------------------------------------------------------------------------------------------------------------------------------------------------------------------------------------------------------------------------------------------------------------------------------------------------------------------------|
| Journal:                        | <i>BMJ Open</i>                                                                                                                                                                                                                                                                                                                                                                                                                                                                                                                                                                                                                                                                                                                                                                                                                                                                                                                                                                                                                                                                                                                                                                                                                                                                                                                                                                                                                                                                                      |
| Manuscript ID                   | bmjopen-2018-024719.R1                                                                                                                                                                                                                                                                                                                                                                                                                                                                                                                                                                                                                                                                                                                                                                                                                                                                                                                                                                                                                                                                                                                                                                                                                                                                                                                                                                                                                                                                               |
| Article Type:                   | Research                                                                                                                                                                                                                                                                                                                                                                                                                                                                                                                                                                                                                                                                                                                                                                                                                                                                                                                                                                                                                                                                                                                                                                                                                                                                                                                                                                                                                                                                                             |
| Date Submitted by the Author:   | 19-Oct-2018                                                                                                                                                                                                                                                                                                                                                                                                                                                                                                                                                                                                                                                                                                                                                                                                                                                                                                                                                                                                                                                                                                                                                                                                                                                                                                                                                                                                                                                                                          |
| Complete List of Authors:       | <p>Taghizadeh, Niloofar; University of Calgary, Medicine<br/> Tremblay, Alain; University of Calgary, Medicine<br/> Cressman, Sonya; The British Columbia Cancer Agency ,<br/> Peacock, Stuart; Canadian Centre for Applied Research in Cancer Control,<br/> McWilliams, Annette; Fionna Stanley Hospital and University of Western Australia<br/> MacEachern, Paul; University of Calgary, Medicine<br/> Johnston, Michael; 4. Beatrice Hunter Cancer Research Institute and Dalhousie University<br/> Goffin, John; The Juravinski Cancer Centre and McMaster University<br/> Goss, Glen ; The Ottawa Hospital Cancer Center<br/> Nicholas, Garth ; The Ottawa Hospital Cancer Center<br/> Martel, Simon; Centre de recherche, Institut universitaire de cardiologie et de pneumologie de Québec,<br/> Laberge, Francis; Centre de recherche, Institut universitaire de cardiologie et de pneumologie de Québec<br/> Bhatia, Rick; Memorial University<br/> Liu, Geoffrey; University Health Network and Princess Margaret Cancer Centre<br/> Schmidt, Heidi; University Health Network and Princess Margaret Cancer Centre<br/> Khattra, Sukhinder; University of British Columbia, Faculty of Medicine-Respiratory Division<br/> Tsao, Ming-Sound; University of Toronto Department of Laboratory Medicine and Pathobiology,<br/> Tammemagi, Martin; Brock University, Community Health Sciences<br/> Lam, Stephen; University of British Columbia, Faculty of Medicine-Respiratory Division</p> |
| <b>Primary Subject Heading</b>: | Oncology                                                                                                                                                                                                                                                                                                                                                                                                                                                                                                                                                                                                                                                                                                                                                                                                                                                                                                                                                                                                                                                                                                                                                                                                                                                                                                                                                                                                                                                                                             |
| Secondary Subject Heading:      | Public health, Radiology and imaging, Respiratory medicine, Smoking and tobacco                                                                                                                                                                                                                                                                                                                                                                                                                                                                                                                                                                                                                                                                                                                                                                                                                                                                                                                                                                                                                                                                                                                                                                                                                                                                                                                                                                                                                      |
| Keywords:                       | Lung cancer, Health-related quality of life, low-dose chest CT, screening, early detection                                                                                                                                                                                                                                                                                                                                                                                                                                                                                                                                                                                                                                                                                                                                                                                                                                                                                                                                                                                                                                                                                                                                                                                                                                                                                                                                                                                                           |
|                                 |                                                                                                                                                                                                                                                                                                                                                                                                                                                                                                                                                                                                                                                                                                                                                                                                                                                                                                                                                                                                                                                                                                                                                                                                                                                                                                                                                                                                                                                                                                      |

1  
2  
3  
4  
5  
6  
7  
8  
9  
10  
11  
12  
13  
14  
15  
16  
17  
18  
19  
20  
21  
22  
23  
24  
25  
26  
27  
28  
29  
30  
31  
32  
33  
34  
35  
36  
37  
38  
39  
40  
41  
42  
43  
44  
45  
46  
47  
48  
49  
50  
51  
52  
53  
54  
55  
56  
57  
58  
59  
60

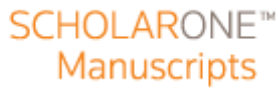

## Health-Related Quality of Life and Anxiety in the PAN-CAN Lung Cancer Screening Cohort

Niloofer Taghizadeh<sup>1</sup>, Alain Tremblay<sup>1</sup>, Sonya Cressman<sup>2</sup>, Stuart Peacock<sup>2</sup>, Annette M. McWilliams<sup>3</sup>, Paul MacEachern<sup>1</sup>, Michael R. Johnston<sup>4</sup>, John Goffin<sup>5</sup>, Glen Goss<sup>6</sup>, Garth Nicholas<sup>6</sup>, Simon Martel<sup>7</sup>, Francis Laberge<sup>7</sup>, Rick Bhatia<sup>8</sup>, Geoffrey Liu<sup>9</sup>, Heidi Schmidt<sup>9</sup>, Sukhinder Atkar-Khattra<sup>2</sup>, Ming-Sound Tsao<sup>9</sup>, Martin C. Tammemagi<sup>10</sup>, Stephen C. Lam<sup>2</sup>, for the Pan-Canadian Early Lung Cancer Study Group.

**Corresponding Author:** Alain Tremblay MDCM, 3300 Hospital Drive NW, Calgary, AB, Canada T2N4N1. Phone 403-210-3866, fax 403-944-1577. ORCID 0000-0002-0025-7426 Email: [atrembla@ucalgary.ca](mailto:atrembla@ucalgary.ca)

### Institutions:

1. University of Calgary, Calgary, AB, Canada.
2. The British Columbia Cancer Agency, Vancouver, BC, Canada.
3. Fionna Stanley Hospital and University of Western Australia, Perth, WA, Australia.
4. Beatrice Hunter Cancer Research Institute and Dalhousie University, Halifax, NS, Canada.
5. The Juravinski Cancer Centre and McMaster University, Hamilton, ON, Canada.
6. The Ottawa Hospital Cancer Center, Ottawa, ON, Canada.
7. Institut Universitaire de Cardiologie et de Pneumologie de Québec, Québec, QC, Canada.
8. Memorial University, St-John's NF, Canada
9. University Health Network and Princess Margaret Cancer Centre, Toronto, Ontario, Canada.
10. Brock University, St. Catharines, ON, Canada.

**Word Count: 3509**

1  
2  
3  
4  
5  
6  
7  
8  
9  
10  
11  
12  
13  
14  
15  
16  
17  
18  
19  
20  
21  
22  
23  
24  
25  
26  
27  
28  
29  
30  
31  
32  
33  
34  
35  
36  
37  
38  
39  
40  
41  
42  
43  
44  
45  
46  
47  
48  
49  
50  
51  
52  
53  
54  
55  
56  
57  
58  
59  
60

**Abbreviation list**

AFB: Autofluorescence bronchoscopy

GGO: Ground-glass opacity

HRQoL: Health-related quality of life

LDCT: Low-dose computed tomography

MCID: Minimal Clinically Important Difference

NLST: The National Lung Screening Trial

NNH: Number-needed-to-harm

SF-12: Physical and Mental Component Scales

SIFs: Incidental findings

STAI: State Trait Anxiety Inventory

For peer review only

## Abstract

**Objectives:** The impact of lung cancer screening with low-dose chest CT (LDCT) on participants' anxiety levels and health-related quality of life (HRQoL) is an important consideration in the implementation of such programs. We aimed to describe changes in anxiety and HRQoL in a high-risk Canadian cohort undergoing LDCT lung cancer screening.

**Methods:** 2,537 subjects who had 2% or greater lung cancer risk over 6 years using a risk prediction tool were recruited from 8 centers across Canada in the Pan-Canadian Early Detection of Lung Cancer Study (2008-2010). We compared HRQoL and anxiety levels before and after screening of 1,237 participants with LDCT, (excluding a subset of 1,300 participants who also underwent autofluorescence bronchoscopy screening), as well as after investigations performed because of a positive screening examination. The 12-item short-form Physical and Mental Component Scales (SF-12), EQ-5D-3L scores, and State Trait Anxiety Inventory (STAI) - State anxiety were used at each assessment.

**Results:** Overall, there were no clinically significant differences in HRQoL outcomes between baseline and each of the survey time points following initial screening. No mean change in anxiety in the overall cohort was noted following baseline LDCT, but more participants had clinically significant increase in anxiety vs. decrease after baseline screening [Increase > Minimal Clinically Important Difference (MCID) (n=180) vs. decrease >MCID (n=50), p<0.001]. This finding persisted but to a lesser degree at the 12-month time point [increase >MCID (n=146) vs. decrease >MCID (n=87), p<0.001].

1  
2  
3 **Conclusions:** CT Screening for Lung Cancer has no major overall impact on HRQoL among  
4  
5 participants, although a minority of participants (number-needed-to-harm = 7 after baseline screening  
6  
7 and 18 at one year) demonstrated clinically significant increased anxiety levels.  
8  
9  
10  
11

12  
13  
14  
15 **Clinical Trial Registration:** ClinicalTrials.gov; No.: NCT00751660; URL: www.clinicaltrials.gov.  
16  
17  
18

19  
20  
21  
22 **Keywords:** Health-related quality of life, lung cancer, low-dose chest CT, screening, early detection,  
23  
24 cohort study  
25  
26  
27  
28  
29  
30  
31  
32  
33  
34  
35  
36  
37  
38  
39  
40  
41  
42  
43  
44  
45  
46  
47  
48  
49  
50  
51  
52  
53  
54  
55  
56  
57  
58  
59  
60

1  
2  
3 **Strengths and Limitation of this Study:**  
4  
5

- 6 65 • This study is the first to describe the psychological and quality of life impacts of lung cancer screening on *discrete*  
7  
8 66 individuals undergoing low-dose CT examinations.  
9  
10 67 • This allows the calculation of number-needed-to-harm estimates based on the minimal clinically significant  
11  
12 68 difference of each instrument rather than mean group changes, important in the informed decision-making process  
13  
14 69 with individuals considering this intervention.  
15  
16 70 • Our cohort was drawn from a multi-center study with high follow-up rates using a participant's baseline status to  
17  
18 71 detect any changes post-screening.  
19  
20 72 • Limitations include the lack of an unscreened control group and the relative homogeneity of our participants  
21  
22 73 (Canadian, Caucasian).  
23  
24  
25 74  
26  
27  
28  
29  
30  
31  
32  
33  
34  
35  
36  
37  
38  
39  
40  
41  
42  
43  
44  
45  
46  
47  
48  
49  
50  
51  
52  
53  
54  
55  
56  
57  
58  
59  
60

## INTRODUCTION

Lung cancer is the leading cause of cancer death in North America and around the world,[1]. Early detection and treatment of lung cancer through screening is a promising strategy to reduce lung cancer mortality,[2]. The largest trial performed to date, the National Lung Screening Trial (NLST), demonstrated that low-dose computed tomography (LDCT) screening in high risk individuals (i.e., ever smokers aged 55 to 74 years,  $\geq 30$  pack-years (number of cigarettes per day / 20 x number of years of smoking) and <15 years since quitting) of smoking significantly reduced lung cancer and overall mortality,[3]. American and Canadian preventative health care agencies have since published recommendations in favor of LDCT lung cancer screening,[3,4]. However, no screening intervention is without potential harm, including adverse psychological impact of the screening intervention, screening results, or subsequent investigations in most participants who will not be found to have cancer. Potential detriments of lung cancer screening include anxiety, and distress from the evaluation of both CT detected false positive and over-diagnosed cancers. A small proportion of the screen-detected tumors would never lead to clinical symptoms, but these over-diagnosed lung cancers are frequently treated, with associated risks of adverse effects,[5,6]. Moreover, studies have shown that CT lung screening has a high rate of significant lung cancer-unrelated incidental findings (SIFs),[7]. These SIFs may require additional investigations and therefore can be associated with adverse psychological impact on participants in a screening program,[6].

A recent systematic review on the psychological burden of LDCT revealed that LDCT screening may be associated with a short-term psychological burden in participants,[8]. Studies to date have explored mean changes in groups of individuals rather than rates of clinically significant changes in individuals screened. Effective policy decisions regarding the implementation of lung cancer screening and



1  
2  
3 97 informed decision making by individuals requires reliable evidence on its potential impacts on Health  
4  
5 98 Related Quality of Life (HRQoL) and psychological wellbeing of individual participants,[9]. Therefore,  
6  
7  
8 99 this study aimed to evaluate the impact of screening modalities on the quality of life and anxiety of  
9  
10 100 participants in the Pan-Canadian Early Detection of Lung Cancer Study.  
11  
12  
13  
14  
15  
16  
17  
18  
19  
20  
21  
22  
23  
24  
25  
26  
27  
28  
29  
30  
31  
32  
33  
34  
35  
36  
37  
38  
39  
40  
41  
42  
43  
44  
45  
46  
47  
48  
49  
50  
51  
52  
53  
54  
55  
56  
57  
58  
59  
60

For peer review only

## METHODS

### Study design and population

The Pan-Canadian Early Detection of Lung Cancer Study, which has been described in detail previously,[10,11], enrolled current or former smokers aged between 50-75 years and with a 2% or greater lung cancer risk over 6 years using a risk-prediction model developed using Prostate, Lung, Colorectal, and Ovarian Cancer Screening Trial data,[12]. Participants were recruited in 8 centers across Canada (Calgary, Halifax, Hamilton, Laval, Ottawa, St-John's, Toronto and Vancouver) from September 2008 to December 2010 with each centers' institutional review board approving the study (e-Appendix 1). Signed informed consent was obtained from each participant.

All participants were offered baseline LDCT with repeat screening at year 1 and 4 in addition to LDCT scans as appropriate for nodule follow-up, with the first half of the recruited subjects to receive autofluorescence bronchoscopy (AFB) as an additional screening modality,[13]. However, since AFB does not appear effective in the screening environment,[13], and to avoid the potential confounding impact of AFB on HRQL, participants in the AFB arm of the study are excluded from the current analysis.

LDCT scan follow-up protocol were determined by the maximum long axis diameter of the largest nodule identified. Participants with any semi-solid or solid nodule 5 to 10 mm, or ground-glass opacity (GGO) 8-10 mm were to receive an additional LDCT at 3 months, with larger lesion being referred for clinical consultation. Any participant requiring repeat LDCT or investigation for a lung lesion other than a planned 12-month follow-up examination were considered to have a positive screening exam for the purpose of this analysis (figure 1). Participants were informed of the various possible findings which

1  
2  
3 123 may be found on CT examinations and general protocols for investigations at the time of study consent.  
4  
5  
6 124 Individualized results letters with description of findings appropriate for a non-medical reader were  
7  
8 125 developed by each study site.  
9  
10

### 11 126 **Health-Related Quality of life (HRQoL), and anxiety**

12  
13  
14

15 127 The 12-item short-form (SF-12) Physical and Mental Component Scales (PCS, and MCS,  
16  
17 128 respectively),[14] and the EuroQoL questionnaire [EQ-5D-3L (Three-level version of EQ-5D)] were  
18  
19 129 used to determine the participants' HRQoL at each assessment. The test-retest reliability coefficient is  
20  
21 130 reported to be 0.89 for the PCS and 0.76 for the MCS. The EQ-5D-3L consists of a preference-based  
22  
23 131 index score and a visual analogue scale (VAS); the index scores were derived from the current Canadian  
24  
25 132 tariff,[15], (a maximum (best) value of 1 (for health state 11111) and a minimum value of -0.34 (for  
26  
27 133 33333)). The VAS is a Likert scale asking participants to draw a line to their current health status on a  
28  
29 134 visual scale ranging between 0 and 100. Scores on the SF-12 are standardized (i.e., mean = 50 and SD  
30  
31 135 = 10), with a higher score indicating better HRQoL.  
32  
33  
34  
35

36  
37 136 To evaluate potential anxiety induced by the results of the screening tests, we used the Spielberger State  
38  
39 137 Trait Anxiety Inventory Form Y (STAI),[16]. Additional methodology details are provided in the online  
40  
41 138 supplement.  
42  
43  
44

45 139 The questionnaires were administered in person at the time of study enrolment (baseline), then by phone  
46  
47 140 within 1 month after the CT results were received by the participants, 1 month after any additional  
48  
49 141 follow-up CT scan or other testing following a positive screen (post investigations) and prior to the 1st  
50  
51 142 annual repeat LDCT (12 months post baseline) (figure 1).  
52  
53  
54  
55  
56  
57  
58  
59  
60

### Statistical analyses

Descriptive analyses of the participants' characteristics and screening outcome were performed. We calculated summary scores of outcome measures for participants in each category at each of the study time points (at baseline, 1 month post baseline CT scan, 12 months after baseline, and post investigations). In addition, the above scores were compared separately in the subset of participants with a positive screening intervention.

To compare overall differences in HRQoL and State-anxiety scores between baseline and each of the survey time points, Generalized Linear Mixed Models were used to take into account the clustering of data within the 8 study sites, the repeated measurement of each individual, the non-normally distributed/skewed outcomes, and any missing data. The estimated margin of means with adjustment for multiple comparisons (Bonferroni correction) was calculated to contrast baseline versus each of the study time points. In these estimations, margins involving empty cells were treated as not estimable.

When significant long-term differences were noted in our mixed model, we further explored the factor association with the observed changes using a multivariate regression model with adjustment for scan results, age, gender, self-reported race, smoking status, pack-years, alcohol consumption, education, family history of any cancer, participants' concern about getting lung cancer at baseline, and for the clustering of data within 8 study sites.

We further compared the proportion of individuals with improvement vs. deterioration greater than the Minimal Clinically Important Difference (MCID) for each instrument. MCIDs for outcome measures were selected based on previously published results as follows: EQ visual analog scale (VAS)=8,[17], EQ-5D-3L index values=0.05,[18], PCS=8.1,[19], MCS=4.7,[14], STAI-State Anxiety=10,[20]. The

1  
2  
3 164 comparisons between these two proportions were performed using Z-test and if significant, the excess  
4  
5  
6 165 number of cases with improvement vs. worsening scores were calculated as a percentage of cases with  
7  
8 166 available data. When significant differences were noted, a number-needed-to-harm (NNH) or number-  
9  
10 167 needed-to-treat (NNT) calculation was applied as appropriate (total number of case/excess cases with  
11  
12 168 worsened or improved score).

13  
14  
15  
16 169 Two-sided p-values < 0.05 were considered as statistically significant. All analyses were performed  
17  
18 170 using SPSS, version 24 (IBM Corp., Armonk, N.Y., USA) or STATA version 14 (StataCorp, College  
19  
20 171 Station, Texas). Sample size was determined by other primary study factors relating to the screening  
21  
22  
23 172 intervention and not the current analysis.

### 24 25 26 173 **Patient and Public Involvement**

27  
28  
29  
30 174 Patient and public involvement in the design of the research was included through the main funding  
31  
32 175 agencies collaborating on the project. This includes the Terry Fox Research Institute, the research arm  
33  
34 176 of The Terry Fox Foundation. In addition, public input was obtained through involvement of the  
35  
36  
37 177 Canadian Partnership Against Cancer, an independent organization funded by the federal government  
38  
39 178 to accelerate action on cancer control for all Canadians. Patients were not specifically involved in the  
40  
41 179 recruitment and conduct of the study and no specific plan to disseminate research findings to participants  
42  
43  
44 180 has been made.

## RESULTS

### Participant characteristics

Two thousand five hundred and thirty-seven participants were enrolled in the Pan-Can study, and 1,237 underwent LDCT alone (without AFB). The mean (SD) age of these participants was 62.9 (6.1) at baseline. Males 558 (45.1 %), Caucasian 1201 (97.1 %), current smokers 768 (62.1 %), and regular alcohol drinkers 961 (77.7 %) comprised the largest groups of participants. The median (IQR) pack-years of smokers was 51.3 (21.6) and mean (SD) duration of smoking was 43.9 (6.1) years. A family history of lung cancer was present in 392 participants (31.7%), (table 1). Median (IQR) lung cancer risk score was 3.5% (2.9) over 6 years. Positive baseline LDCT examinations were noted in 279 (22.6%) participants of which 35 (2.8%) led to a diagnosis of lung cancer.

**Table 1-Baseline characteristics of Pan-Canadian Early Detection of Lung Cancer Study participants.**

| Characteristics                           | All Enrolled<br>(n=1237) |
|-------------------------------------------|--------------------------|
| Age, mean (SD)                            | 62.9 (6.1)               |
| Gender (males), n (%)                     | 558 (45.1)               |
| Race *, n (%)                             |                          |
| Caucasian                                 | 1201 (97.1)              |
| Asian                                     | 15 (1.2)                 |
| Black or African Canadian                 | 7 (0.6)                  |
| Aboriginal                                | 4 (0.3)                  |
| Pacific Islander                          | 0 (0.0)                  |
| Other                                     | 10 (0.8)                 |
| Education, n (%)                          |                          |
| 8 <sup>th</sup> grade or less             | 32 (2.3)                 |
| 9 <sup>th</sup> to 12 <sup>th</sup> grade | 153 (12.4)               |

|                                                       |                      |
|-------------------------------------------------------|----------------------|
| High school graduate                                  | 337 (27.2)           |
| Bachelor's degree                                     | 107 (8.7)            |
| Technical/Vocational/School certificate               | 260 (21.0)           |
| Associate degree/some college                         | 205 (16.6)           |
| Advanced Degree                                       | 144 (11.6)           |
| <b>Smoking habits</b>                                 |                      |
| Current smokers, n (%)                                | 768 (62.1)           |
| Pack- years, median ( IQR, range)                     | 51.3 (21.6, 2.2-230) |
| Smoking duration (years), mean (SD)                   | 43.9 (6.1)           |
| <b>Alcohol consumption</b>                            |                      |
| Current regular drinkers**, n (%)                     | 961 (77.7)           |
| <b>Family history of lung cancer, n (%)</b>           | 392 (31.7)           |
| <b>Being worried about getting lung cancer, n (%)</b> |                      |
| Rarely or never                                       | 267 (21.6)           |
| Sometimes                                             | 656 (53.0)           |
| Often                                                 | 235 (19.0)           |
| All of the time                                       | 75 (6.1)             |
| <b>Scan results at baseline, n (%)</b>                |                      |
| Positive                                              | 279 (22.6)           |
| Negative                                              | 958 (77.4)           |
| <b>Lung cancer risk score, median (IQR, range)</b>    | 3.5 (2.9, 2.0-33.5)  |

\* Missing, n (%)=5 (0.2).

\*\*Regular alcohol consumption: having more than one drink per week for a period of 6 months or more. Missing, n=11.

## Health-related quality of life and anxiety measures

### Baseline

1  
2  
3 202 At baseline, participants reported being concerned about getting lung cancer always (6.1 %), often  
4  
5 203 (19.0%) and sometimes (53.0 %). General health problems were reported by 65.0% of respondents on  
6  
7  
8 204 at least one item on the EQ-5D-3L. Average baseline EQ visual analogue scale (VAS), EQ-5D-3L index  
9  
10 205 values, PCS, MCS, and STAI-State Anxiety scores were 76.3, 0.84, 46.1, 51.1, and 30.9, respectively  
11  
12 206 (Table 2).

### 13 14 15 16 207 Baseline screening

17  
18  
19 208 No statistically significant mean changes in EQ VAS, EQ-5D-3L index values, PCS, or MCS levels  
20  
21 209 were noted following baseline CT screening. In addition, the proportion of individuals experiencing a  
22  
23  
24 210 deterioration vs. improvement greater than the MCID for EQ VAS (figure 2), EQ-5D-3L (figure 3),  
25  
26 211 PCS (figure 4) and MCS (figure 5) were not significantly different. However, the STAI-State Anxiety  
27  
28 212 levels increased in participants following baseline LDCT [change (95% CI): 2.27 (0.57 to 3.96), p-value  
29  
30  
31 213 <0.001] (Table 2). A greater proportion of individuals experiencing a deterioration vs. improvement  
32  
33 214 greater than the MCID of 10 for the STAI - State Anxiety levels was also noted [increase >MCID  
34  
35 215 (n=180) vs. decrease >MCID (n=50), p-value <0.001] (figure 6). The excess number of participants with  
36  
37  
38 216 increased vs. decreased anxiety represents 13.8% [(180-50)/937, NNH = 7] of participants with available  
39  
40 217 data. This change remained significant even if only participant with a negative screen were considered  
41  
42 218 [mean baseline STAI 31.2; increase >MCID (n=129) vs. decrease >MCID (n=40), p-value < 0.0001].  
43  
44  
45 219 Multivariate regression analysis demonstrated female gender and increased baseline concern about  
46  
47 220 getting lung cancer to be associated with increased anxiety following screening (Table 3).

48  
49  
50 221 **Table 2- HRQoL, and anxiety measures at baseline and at different time-points within the study. Generalized linear**  
51 222 **mixed model.**  
52 223



|                                 | Baseline<br>(n=1,237) | 1-month post baseline CT scan<br>Mean, change (95% CI)<br>(n=953) | 12-months after baseline CT<br>Mean, change (95% CI)<br>(n=1066) |
|---------------------------------|-----------------------|-------------------------------------------------------------------|------------------------------------------------------------------|
| EQ VAS <sup>1</sup>             | 76.3                  | 76.8, 0.42 (-1.39 to 2.23)                                        | 76.8, 0.22 (-0.88 to 1.32)                                       |
| EQ-5D-3L index values           | 0.84                  | 0.84, -0.00 (-0.02 to 0.01)                                       | 0.84, -0.00 (-0.01 to 0.01)                                      |
| SF-12: PCS <sup>2</sup>         | 46.1                  | 46.8, 0.61 (-0.15 to 1.37)                                        | 46.4, 0.31 (-0.55 to 1.17)                                       |
| SF-12: MCS <sup>3</sup>         | 51.1                  | 50.9, -0.26 (-1.04 to 0.52)                                       | 51.2, -0.14 (-1.14 to 0.86)                                      |
| STAI-State Anxiety <sup>4</sup> | 30.9                  | <b>33.1, 2.27 (0.57 to 3.96) <sup>5</sup></b>                     | 31.7, 1.11 (-1.11 to 3.33)                                       |

<sup>1</sup> EQ Visual Analogue Scale “We would like to know how good or bad your health is today” (100 – best imaginable, 0 – worst imaginable).

<sup>2</sup> Physical Health Composite Scores (US population mean = 50 +/- 10), with higher score corresponding to better state.

<sup>3</sup> Mental Health Composite Scores (US population mean = 50 +/- 10), with higher score corresponding to better state.

<sup>4</sup> STAI-State score >39 considered clinically significant symptoms.

<sup>5</sup> P-value < 0.05 compared with baseline. Post-estimated marginal means with adjustment for multiple comparison (Bonferroni).

**Table 3-Factor associated with changes in anxiety levels from baseline to 1-month post baseline CT scan.**

|                                                 | Changes in anxiety levels (STAI-S)<br>Beta coefficient (95 % CI) |
|-------------------------------------------------|------------------------------------------------------------------|
| Positive scan results                           | -0.70 (-1.91 to 0.51)                                            |
| Age                                             | -0.09 (-0.18 to 0.01)                                            |
| Females                                         | <b>1.01 (0.02 to 2.16)*</b>                                      |
| Current smokers                                 | 0.57 (-0.50 to 1.64)                                             |
| Pack-years                                      | -0.01 (-0.03 to 0.01)                                            |
| Current alcohol consumption                     | -0.63 (-1.86 to 0.60)                                            |
| Family history of any cancer                    | -1.14 (-2.28 to 0.01)                                            |
| Participants' concern about getting lung cancer |                                                                  |
| All the time                                    | <b>3.79 (0.24 to 7.32)*</b>                                      |
| Often                                           | 1.73 (-0.00 to 3.47)                                             |
| Sometimes                                       | 0.99 (-0.12 to 2.10)                                             |

1  
2  
3  
4  
5  
6  
7  
8  
9  
10  
11  
12  
13  
14  
15  
16  
17  
18  
19  
20  
21  
22  
23  
24  
25  
26  
27  
28  
29  
30  
31  
32  
33  
34  
35  
36  
37  
38  
39  
40  
41  
42  
43  
44  
45  
46  
47  
48  
49  
50  
51  
52  
53  
54  
55  
56  
57  
58  
59  
60

Multivariate regression model with adjustment for scan results, age, gender, race, smoking status, pack-years, alcohol consumption, education, family history of any cancer, participants' concern about getting lung cancer at baseline, and for the clustering of data within 8 study sites. \*p<0.05

#### Twelve-month assessment

No statistically significant mean changes in EQ VAS, EQ-5D-3L index values, PCS, or STAI - State Anxiety levels were detected in participants at the 12 month interview. The proportion of individuals with deterioration vs. improvement greater than the MCID for the instrument remained significant for the STAI - State anxiety levels [increase >MCID (n=146) vs. decrease >MCID (n=87), p-value <0.0001], representing 5.5% [(146-87)/1066, NNH=18] of participants (figure 6). The proportion of individuals experiencing a deterioration vs. improvement greater than the MCID for EQ VAS (figure 2), EQ-5D-3L (figure 3), PCS (figure 4) and MCS (figure 5) were not significantly different.

#### Positive screen and investigation

Among participants receiving a positive scan results (n=279), no statistically significant mean changes in EQ VAS, EQ-5D-3L index values, PCS, or MCS were detected following baseline LDCT (Online supplementary Table 1). However, more participants experienced a clinically significant decrease vs. increase in anxiety score [increase >MCID (n= 20) vs. decrease >MCID (n=41), p-value=0.002] representing 8.8% [(41-20)/238, NNT=11] of these participants (figure 7). This decreased anxiety persisted at the 12-month interview [increase >MCID (n=14) vs. decrease >MCID (n=35), p-value=0.003] representing 8.5% [(35-14)/246, NNT=12] of participants (figure 8).

1  
2  
3 260 Following investigation examinations, no statistically significant mean changes in EQ VAS, EQ-5D-3L  
4  
5  
6 261 index values, PCS, MCS, or anxiety were detected. Post-investigation changes revealed no statistically  
7  
8 262 significant changes in the proportion of individuals with deterioration vs. improvement greater than the  
9  
10 263 MCID (figure 7).

11  
12  
13 264 The proportion of different levels of each questionnaires' dimensions by study visits, as well as number  
14  
15  
16 265 of missing values, are shown in the online supplementary Tables 2 to 4.

## DISCUSSION

This study offers detailed information on HRQoL and anxiety following LDCT for lung cancer screening in a Canadian high-risk selected population using validated assessment tools measuring overall HRQoL as well as specific physical, psychological and anxiety scores. Our study found no clinically significant differences in HRQoL outcomes between baseline and each of the survey time points following initial screening in the cohort as a whole. However, more participants experienced a clinically significant increased anxiety (vs. decreased) following baseline LDCT. This finding was more pronounced among females and participants who were concerned about getting lung cancer at baseline. Paradoxically, decreased anxiety was more frequent in the subgroup with positive baseline scan, although the impact of scan results did not reach statistical significance in the multivariate analysis. Over the long-term, no adverse effects on HRQoL were noted but some of the excess in increased anxiety levels persisted.

In line with our findings, analyses of other screening cohorts including NLST,[21] NELSON,[22] PLCO,[23] and UKLS,[24] as well as two recent meta-analyses have demonstrated that lung cancer screening is associated with little to no adverse physical or psychological long-term impact on participants[8,25]. While analysis of the Danish Lung Cancer Screening Trial did show negative consequences at 1 year,[26] and 2 year,[27] follow-up, the degree of change was actually greater in the control (no screening) arm of the trial.

Our finding of decreased anxiety following a positive screen is in contrast with those reported in the UKLS,[24] and NLST trials,[21] which observed a short-term increase in distress levels two weeks or 2 months respectively after a positive result notification of baseline screening. Results from

1  
2  
3 287 NELSON,[28] and from the Pittsburgh Lung Screening Study,[29] also reported a short-term lung  
4  
5  
6 288 cancer-specific distress, a poorer quality of life and a higher level of anxiety among participants with  
7  
8 289 indeterminate scan results compared with those with negative results. However, in both studies these  
9  
10  
11 290 negative impacts disappeared over time. The explanation for this finding may relate to the small size of  
12  
13 291 our program and personalized communication process for results in the study. The absolute number of  
14  
15 292 participants with significant changes in this metric was also relatively small, so that this finding should  
16  
17 293 not be over-interpreted.  
18  
19

20  
21 294 Similar to our findings, NELSON study reported a worse HRQoL outcomes among females compared  
22  
23 295 to males,[28]. Furthermore, our observation regarding females is also consistent with the results of a  
24  
25 296 study of PLCO participants,[23] that found a poorer MCS outcomes in females compared to males.  
26  
27

28  
29 297 In most studies reported to date, statistically significant mean changes in HRQoL-related scores detected  
30  
31 298 in groups of screened individuals have been small and of questionable clinical significance limiting the  
32  
33 299 impact of such findings in clinical decision-making. Conversely, lack of statistically significant changes  
34  
35 300 in population means can mask clinically meaningful changes in individuals. The MCID has been  
36  
37 301 suggested to be a useful benchmark to define the smallest difference in HRQoL that individuals perceive  
38  
39 302 as beneficial or harmful and that mandates a change in management,[30]. Only two previous lung cancer  
40  
41 303 screening trial have reported MCID levels to interpret the changes in HRQoL of participants,[22,24,28].  
42  
43 304 However, both applied this concept to mean population changes rather than to discrete individual  
44  
45 305 changes. Our study is unique in providing discrete participant data on the proportion of individuals with  
46  
47 306 improvement vs. deterioration greater than the MCID for each assessment tool. This has allowed us to  
48  
49 307 attribute to the intervention excess cases of deterioration vs. improvement given normal expected  
50  
51 308 variations in each individual over time. This can suggest if a true clinically significant impact is present,  
52  
53  
54  
55  
56  
57  
58  
59  
60

1  
2  
3 309 and specifying how many individuals are impacted by such a change, in order to calculate a “number-  
4  
5  
6 310 needed-to-harm” value. With this approach, we found that the proportion of individuals with  
7  
8 311 improvement vs. deterioration greater than the MCID for the STAI was significantly different among  
9  
10 312 all participants with a number needed to harm of 7 in the short term following screening, and 18 at one-  
11  
12  
13 313 year post screening. Our data adds to an evolving body of evidence which suggests that LDCT screening  
14  
15 314 for lung cancer does not have overall significant negative impacts on the HRQoL of the population  
16  
17 315 screened. However, a minority of individuals do experience small but clinically significant increases in  
18  
19 316 anxiety levels following screening.  
20

21  
22  
23 317 The major strengths of our study include the use of a large multicenter sample of eligible participants,  
24  
25 318 and reporting of individual participant data in relation to their MCID using three different and well-  
26  
27  
28 319 established instruments for measuring HRQoL and anxiety as well as the risk prediction model used for  
29  
30 320 the recruitment,[31]. Another strength of our study is the longitudinal design with a high follow-up and  
31  
32 321 response rate (see online supplementary tables 2-4), which enabled us to assess short- and long-term  
33  
34 322 outcomes at different time points during screening process with each participant serving as his/her own  
35  
36  
37 323 control. While we enrolled a high risk cohort using a risk prediction model, our participants’ baseline  
38  
39 324 HRQoL metrics appeared comparable to those of similarly aged individuals in the general population  
40  
41 325 [Adults aged 55-69, mean EQ VAS: 76,[32]; age 50-59, mean STAI: 32.2(female)/34.5(male),[16]; age  
42  
43 326 50-69, PCS: 50.9-51.3, MCS: 50.7-50.9,[33]] suggesting that our findings could be generalizable to a  
44  
45  
46 327 broader population of screen-eligible individuals but with lower risk of lung cancer than in our  
47  
48 328 population. Our study is also the first to use the full EQ-5D score in this population, which can be used  
49  
50 329 to calculate quality-adjusted-life-years.  
51  
52  
53  
54  
55  
56  
57  
58  
59  
60

1  
2  
3 330 The current study has potential limitations. Our population was made up almost entirely of Caucasians,  
4  
5  
6 331 so that a differential impact of screening on other ethnic communities cannot be determined. Owing to  
7  
8 332 the study design for HRQoL assessments, we were unable to address the impacts of incidental findings  
9  
10  
11 333 on HRQoL and anxiety of participants. Another potential limitation is that we did not compare our  
12  
13 334 results to an unscreened control group but instead used each participant's baseline scores. As such, other  
14  
15 335 factors unrelated to the screening intervention, such as aging or changes in smoking status, could affect  
16  
17 336 the longitudinal changes (or lack thereof) noted in our study [34]. However, two previous studies with  
18  
19 337 a randomized design and a control group reported the HRQoL results that were comparable to our  
20  
21  
22 338 findings,[14,20]. Another potential limitation is that the EQ-5D-3L is usually associated with a ceiling  
23  
24 339 effect (i.e., scores recording perfect health),[35] and has limited ability to determine small changes in  
25  
26 340 health status compared to the five-level EQ-5D-5L, which might offer improved measure of population-  
27  
28  
29 341 weighted health state utility,[36,37]. In our study, 35 % of participants reported perfect scores on EQ-  
30  
31 342 5D-3L at baseline; suggesting a ceiling effect that was adjusted for with a generalized linear mixed  
32  
33 343 modeling approach,[38]. Moreover, HRQoL in our study was also measured by SF-12, which has been  
34  
35  
36 344 known to demonstrate a smaller ceiling/floor effect compared to EQ-5D-3L,[35]. In our study, no  
37  
38 345 ceiling/floor effect was observed for the SF-12 scores. Finally, the statistical power to detect changes in  
39  
40 346 some participant subgroups such as those with positive screens may be limited because of low number  
41  
42 347 of participants with a positive scan results. Therefore, caution should be used in drawing conclusions.  
43  
44  
45

46 348 The complexity of longitudinal analysis of HRQoL and the lack of agreed upon standardized approach  
47  
48 349 compromise the comparison of results between studies,[39]. Even the specific MCID level for each  
49  
50 350 instrument can be debated. Ideally such levels are determined in the specific population of interest, but  
51  
52 351 such information is rarely available. Levels chosen for our analysis were determined prior to any data  
53  
54  
55  
56  
57  
58  
59  
60

1  
2  
3 352 analysis based on best evidence for each instrument. As a confirmatory step, MCIDs selected in this  
4  
5  
6 353 study were found to approximate estimates obtained as half a Standard Deviation (SD) (MID) of HRQoL  
7  
8 54 measures in our population (results not shown), an alternative distribution-based approach to MCID  
9  
10 55 determination,[40].  
11  
12

13  
14 356 The findings of our study corroborate and expand the current evidence-based information on lung cancer  
15  
16 357 screening decision making by showing that there is a minimal overall psychological impact associated  
17  
18 358 with lung cancer screening. However, certain populations (i.e., females, participants with higher baseline  
19  
20 359 concern about lung cancer) may be at a higher risk of negative psychological impact. This suggests that  
21  
22 360 an improved communication is needed throughout the entire lung cancer screening process, especially  
23  
24 361 for the potentially vulnerable subgroups. Since most positive screens do not result in a lung cancer  
25  
26 362 diagnosis, approaches to better define screening exam findings and reduce false positive rates could be  
27  
28 363 effective in reducing the anxiety burden in this subgroup. Despite the high rate of false positive CT  
29  
30 364 results in lung cancer screening, there is no clear recommendation yet on psychological interventions to  
31  
32 365 help individuals cope with abnormal CT screening results. However, literature on mammography  
33  
34 366 screening has shown that immediate follow-up and consultation can significantly reduce anxieties after  
35  
36 367 receiving abnormal mammograms,[41].  
37  
38  
39  
40  
41

42 368 In conclusion, our study demonstrated that CT Screening for Lung Cancer has no major impact on  
43  
44 369 HRQoL among participants overall, but some individuals experience clinically significant increase in  
45  
46 370 anxiety with a number needed to harm of 18 at one year post initial screen. While these impacts may  
47  
48 371 appear minor in view of the robust mortality reduction associated with LDCT screening, ongoing work  
49  
50 372 to further define and minimize these negative aspects of screening is warranted given recommendations  
51  
52 373 for broad screening of at risk populations.  
53  
54  
55  
56  
57  
58  
59  
60



1  
2  
3  
374  
4  
5  
6  
775  
8  
9  
10  
376  
11  
12  
13  
14  
15  
16  
17  
18  
19  
20  
21  
22  
23  
24  
25  
26  
27  
28  
29  
30  
31  
32  
33  
34  
35  
36  
37  
38  
39  
40  
41  
42  
43  
44  
45  
46  
47  
48  
49  
50  
51  
52  
53  
54  
55  
56  
57  
58  
59  
60

For peer review only

**Author's contributions:**

NT: led data analysis & data interpretation; prepared the draft manuscript; approved final manuscript; agrees to be accountable for all aspects of the work.

AT: contributed to study conception and design, data acquisition, analysis and interpretation; prepared the draft manuscript; approved final manuscript; agrees to be accountable for all aspects of the work.

SCL: contributed to study conception and design, data acquisition and interpretation; critically reviewed and approved final manuscript; agrees to be accountable for all aspects of the work.

MCT: contributed to study conception and design, data analysis and interpretation; critically reviewed and approved final manuscript; agrees to be accountable for all aspects of the work.

MST: contributed to study conception and design, data analysis and interpretation; critically reviewed and approved final manuscript; agrees to be accountable for all aspects of the work.

SC: contributed to study conception and design, data analysis and interpretation; critically reviewed and approved final manuscript; agrees to be accountable for all aspects of the work.

SAK: contributed to study conception, design and data acquisition; critically reviewed and approved final manuscript; agrees to be accountable for all aspects of the work.

AMC: contributed to study conception and design, data acquisition and interpretation; critically reviewed and approved final manuscript; agrees to be accountable for all aspects of the work.

PM, SP, MJ, JG, GG, GN, SM, FL, RB, GL, HS: contributed to study conception and design, data acquisition and interpretation; critically reviewed and approved final manuscript; agrees to be accountable for all aspects of the work.

**Conflict of interest**

The authors declare that there is no conflict of interest.

1  
2  
3  
399  
4  
5  
6  
7  
400 **Funding**  
8  
9

10 The study was funded by the Terry Fox Research Institute and the Canadian Partnership Against Cancer.  
11  
12 Additional research support provided by the Arnie Charbonneau Cancer Institute and the Alberta Cancer  
13  
14 Foundation. Primary results of the study have been published previously [11].  
15  
16  
17  
18  
19  
20  
21

22 **Data Sharing Statement**  
23  
24

25 No additional unpublished data from the study is made available.  
26  
27  
28  
29  
30  
31  
32  
33  
34  
35  
36  
37  
38  
39  
40  
41  
42  
43  
44  
45  
46  
47  
48  
49  
50  
51  
52  
53  
54  
55  
56  
57  
58  
59  
60

## References

- 1  
2  
3  
409  
4  
5  
6  
7  
8  
9  
10  
11  
12  
13  
14  
15  
16  
17  
18  
19  
20  
21  
22  
23  
24  
25  
26  
27  
28  
29  
30  
31  
32  
33  
34  
35  
36  
37  
38  
39  
40  
41  
42  
43  
44  
45  
46  
47  
48  
49  
50  
51  
52  
53  
54  
55  
56  
57  
58  
59  
60
- [1] Brambilla E, Travis WD, Brennan P, et al. Lung cancer. In: Stewart BW, Wild CP, eds. World cancer report 2014. International Agency for Research on Cancer (2014) 350-361.
- [2] National Lung Screening Trial Research Team, Aberle DR, Berg CD, Black WC, et al. The National Lung Screening Trial: overview and study design. *Radiology* (2011) 258:243-253.
- [3] Recommendations on screening for lung cancer. *CMAJ* (2016)188:425-432.
- [4] Moyer VA. Screening for lung cancer: U.S. Preventive Services Task Force recommendation statement. *Ann Intern Med* (2014)160:330-338.
- [5] Bach PB, Mirkin JN, Oliver TK. Benefits and harms of CT screening for lung cancer: a systematic review. *JAMA* (2012) 307:2418-2429.
- [6] Patz EF Jr, Pinsky P, Gatsonis C, et al; NLST Overdiagnosis Manuscript Writing Team. Overdiagnosis in low-dose computed tomography screening for lung cancer. *JAMA Intern Med* (2014)174:269-274.
- [7] Marshall HM, Bowman RV, Yang IA, et al. Screening for lung cancer with low-dose computed tomography: a review of current status. *J Thorac Dis* (2013) 5 Suppl 5:S524-S539.
- [8] Wu GX, Raz DJ, Brown L, et al. Psychological Burden Associated with Lung Cancer Screening: A Systematic Review. *Clin Lung Cancer* (2016) pii: S1525-7304 (16) 30053-30055.

- 1  
2  
3  
4 26 [9] Miller AB, Madalinska JB, Church T, et al. Health-related quality of life and cost-effectiveness  
5  
6 27 studies in the European randomised study of screening for prostate cancer and the US Prostate,  
7  
8 28 Lung, Colon and Ovary trial. *Eur J Cancer* (2001) 37: 2154-2160.  
9  
10  
11  
12 29 [10] McWilliams A, Tammemagi MC, Mayo JR, et al. Probability of cancer in pulmonary nodules  
13  
14 30 detected on first screening CT. *N Engl J Med* (2013) 369:910-919.  
15  
16  
17 31 [11] Tammemagi MC, Schmidt H, Martel S, et.al. Participant selection for lung cancer screening by risk  
18  
19 32 modelling (the Pan-Canadian Early Detection of Lung Cancer (PanCan) study): a single-arm,  
20  
21 33 prospective study. *Lancet Oncol* (2017) pii: S1470-2045(17)30597-1.  
22  
23  
24  
25 34 [12] Tammemagi MC, Freedman MT, Pinsky PF, et al. Prediction of true positive lung cancers in  
26  
27 35 individuals with abnormal suspicious chest radiographs: a prostate, lung, colorectal, and ovarian  
28  
29 36 cancer screening trial study. *J Thorac Oncol* (2009) 4:710-721.  
30  
31  
32  
33 37 [13] Tremblay A, Taghizadeh N, McWilliams AM, et al. Low Prevalence of High Grade Lesions  
34  
35 38 Detected with Autofluorescence Bronchoscopy in the Setting of Lung Cancer Screening in the  
36  
37 39 Pan-Canadian Lung Cancer Screening Study. *Chest* (2016) 150:1015-1022.  
38  
39  
40  
41 40 [14] Jenkinson C, Layte R, Jenkinson D, et al. A shorter form health survey: can the SF-12 replicate  
42  
43 41 results from the SF-36 in longitudinal studies? *J Public Health Med* (1997) 19:179-186.  
44  
45  
46  
47 42 [15] Bansback N Tsuchiya A BJAA. Canadian valuation of EQ-5D health states: preliminary value set  
48  
49 43 and considerations for future valuation studies. *PLoS One* (2012) 7:e31115. doi:  
50  
51 44 10.1371/journal.pone.0031115.  
52  
53  
54  
55  
56  
57  
58  
59  
60

- 1  
2  
3 445 [16] Spielberger CD, Gorsuch RL, Lushene RE. Test manual for the State-Trait Anxiety Inventory. Palo  
4  
5  
6 446 Alto, CA: Consulting Psychologists Press, 1970.  
7  
8  
9 447 [17] Zanini A, Aiello M, Adamo D, et al. Estimation of minimal clinically important difference in EQ-  
10  
11 448 5D visual analog scale score after pulmonary rehabilitation in subjects with COPD. *Respir Care*  
12  
13 (2015) 60:88-95.  
14  
15  
16  
17 450 [18] Le QA, Doctor JN, Zoellner LA, Feeny NC. Minimal clinically important differences for the EQ-  
18  
19 451 5D and QWB-SA in Post-traumatic Stress Disorder (PTSD): results from a Doubly Randomized  
20  
21 Preference Trial (DRPT). *Health Qual Life Outcomes* (2013) 11:59.  
22  
23  
24  
25 453 [19] Parker SL, Godil SS, Shau DN, Mendenhall SK, McGirt MJ. Assessment of the minimum clinically  
26  
27 454 important difference in pain, disability, and quality of life after anterior cervical discectomy and  
28  
29 fusion: clinical article. *J Neurosurg Spine* (2013)18:154-160.  
30  
31  
32  
33 456 [20] Corsaletti BF, Proença MGL, Bisca GKW, et al. Minimal important difference for anxiety and  
34  
35 457 depression surveys after intervention to increase daily physical activity in smokers. *Fisioter Pesq*  
36  
37 (2014) 21:359-364.  
38  
39  
40  
41 459 [21] Gareen IF, Duan F, Greco EM, et al. Impact of lung cancer screening results on participant health-  
42  
43 460 related quality of life and state anxiety in the National Lung Screening Trial. *Cancer* (2014)  
44  
45 3401-3409.  
46  
47  
48  
49 462 [22] Van den Bergh KA, Essink-Bot ML, Borsboom GJ, Scholten ET, van Klaveren RJ, de Koning HJ.  
50  
51 Long-term effects of lung cancer computed tomography screening on health-related quality of  
52  
53 life: the NELSON trial. *Eur Respir J* (2011) 38:154-161.  
54  
55  
56  
57  
58  
59  
60

- 1  
2  
3  
4 465 [23] Taylor KL, Shelby R, Gelmann E, et al. Quality of life and trial adherence among participants in  
5  
6 466 the prostate, lung, colorectal, and ovarian cancer screening trial. *J Natl Cancer Inst* (2004) 96:  
7  
8 467 1083-1094.  
9  
10  
11  
12 468 [24] Brain K, Lifford KJ, Carter B, et al. Long-term psychosocial outcomes of low-dose CT screening:  
13  
14 469 results of the UK Lung Cancer Screening randomised controlled trial. *Thorax* (2016) 71:996-  
15  
16 470 1005.  
17  
18  
19  
20 471 [25] Slatore CG, Sullivan DR, Pappas M, et al. Patient-centered outcomes among lung cancer screening  
21  
22 472 recipients with computed tomography: a systematic review. *J Thorac Oncol* (2014) 9:927-934.  
23  
24  
25  
26 473 [26] Aggestrup LM, Hestbech MS, Siersma V, et al. Psychosocial consequences of allocation to lung  
27  
28 474 cancer screening: a randomised controlled trial. *BMJ Open* (2012) 1;2:e000663.  
29  
30  
31  
32 475 [27] Rasmussen JF, Siersma V, Pedersen JH, et al. Psychosocial consequences in the Danish randomised  
33  
34 476 controlled lung cancer screening trial (DLCST). *Lung Cancer* (2015) 87:65-72.  
35  
36  
37 477 [28] Van den Bergh KA, Essink-Bot ML, Borsboom GJ, et al. Short-term health-related quality of life  
38  
39 478 consequences in a lung cancer CT screening trial (NELSON). *British Journal of Cancer* (2010)  
40  
41 479 102, 27 - 34.  
42  
43  
44  
45 480 [29] Byrne MM, Weissfeld J, Roberts MS. Anxiety, fear of cancer, and perceived risk of cancer  
46  
47 481 following lung cancer screening. *Med Decis Making* (2008) 28:917-925.  
48  
49  
50  
51 482 [30] Jaeschke R, Singer J, Guyatt GH. Measurement of health status. Ascertain the minimal clinically  
52  
53 483 important difference. *Control Clin Trials* (1989)10:407-415.  
54  
55  
56  
57  
58  
59  
60

- 1  
2  
3 484 [31] Tammemagi MC, Katki HA, Hocking WG, et al. Selection criteria for lung-cancer screening. N  
4  
5  
6 485 Engl J Med 2013;368:728-736.  
7  
8  
9 486 [32] Johnson JA, Pickard AS. Comparison of the EQ-5D and SF-12 health surveys in a general  
10  
11 487 population survey in Alberta, Canada. Med Care (2000) 38:115-121.  
12  
13  
14  
15 488 [33] Mols F, Pelle AJ, Kupper N. Normative data of the SF-12 health survey with validation using  
16  
17 489 postmyocardial infarction patients in the Dutch population. Qual Life Res (2009) 18:403-414.  
18  
19  
20  
21 490 [34] Hestbech MS, Siersma V, Dirksen A, et al. Participation bias in a randomised trial of screening for  
22  
23 491 lung cancer. Lung Cancer (2011) 73:325-331.  
24  
25  
26  
27 492 [35] Tramontano AC, Schrag DL, Malin JK, et al. Catalog and comparison of societal preferences  
28  
29 493 (utilities) for lung cancer health states: results from the Cancer Care Outcomes Research and  
30  
31 494 Surveillance (CanCORS) study. Med Decis Making (2015) 35:371-387.  
32  
33  
34  
35 495 [36] Pickard AS, De Leon MC, Kohlmann T, et al. Psychometric comparison of the standard EQ-5D to  
36  
37 496 a 5 level version in cancer patients. Med Care (2007) 45:259-263.  
38  
39  
40 497 [37] Wang P, Luo N, Tai ES, et al. The EQ-5D-5L is More Discriminative Than the EQ-5D-3L in  
41  
42 498 Patients with Diabetes in Singapore. Value Health Reg Issues (2016) 9:57-62.  
43  
44  
45  
46 499 [38] Lo S, Andrews S. To transform or not to transform: using generalized linear mixed models to  
47  
48 500 analyse reaction time data. Front Psychol (2015) 6:1171.  
49  
50  
51  
52 501 [39] Bonnetain F, Fiteni F, Efficace F, et al. Statistical Challenges in the Analysis of Health-Related  
53  
54 502 Quality of Life in Cancer Clinical Trials. J Clin Oncol (2016) 34:1953-1956.  
55  
56  
57  
58  
59  
60



1  
2  
3 503 [40] Norman GR, Sloan JA, Wyrwich KW. Interpretation of changes in health-related quality of life:  
4  
5 504 the remarkable universality of half a standard deviation. *Med Care* (2003) 41:582-592.

6  
7  
8  
9 505 [41] Barton MB, Morley DS, Moore S, et al. Decreasing women's anxieties after abnormal  
10  
11 506 mammograms: a controlled trial. *J Natl Cancer Inst* (2004) 96:529-538.

12  
13  
14  
15 507  
16  
17  
18 508  
19  
20  
21  
22  
23  
24  
25  
26  
27  
28  
29  
30  
31  
32  
33  
34  
35  
36  
37  
38  
39  
40  
41  
42  
43  
44  
45  
46  
47  
48  
49  
50  
51  
52  
53  
54  
55  
56  
57  
58  
59  
60

For peer review only

**Figure legends**

Figure 1- Assessments of the health-related quality of life (HRQoL) and anxiety in the Pan-Canadian Early Detection of Lung Cancer Study.

Figure 2: Changes in EuroQoL Visual Analog Scale (VAS) from baseline to post baseline CT(A), and 12 months after baseline(B).

Figure 3: Changes in EuroQoL(EQ)-5D-3L from baseline to post baseline CT(A), and 12 months after baseline(B).

Figure 4: Changes in 12-item short-form Physical Component Scale(PCS) from baseline to post baseline CT(A), and 12 months after baseline(B).

Figure 5: Changes in 12-item short-form Mental Component Scale (MCS) from baseline to post baseline CT(A), and 12 months after baseline(B).

Figure 6: Changes in Spielberger State Trait Anxiety Inventory (STAI) from baseline to post baseline CT(A), and 12 months after baseline(B).

Figure 7: Changes in Spielberger State Trait Anxiety Inventory (STAI) from baseline to post baseline CT (A) and post investigation (B) among participants with a positive scan results.

Figure 8: Changes in Spielberger State Trait Anxiety Inventory (STAI) from baseline to 12 months among participants with a positive scan results.

**Figure 1- Assessments of the health-related quality of life (HRQoL) and anxiety in the Pan-Canadian Early Detection of Lung Cancer Study.**

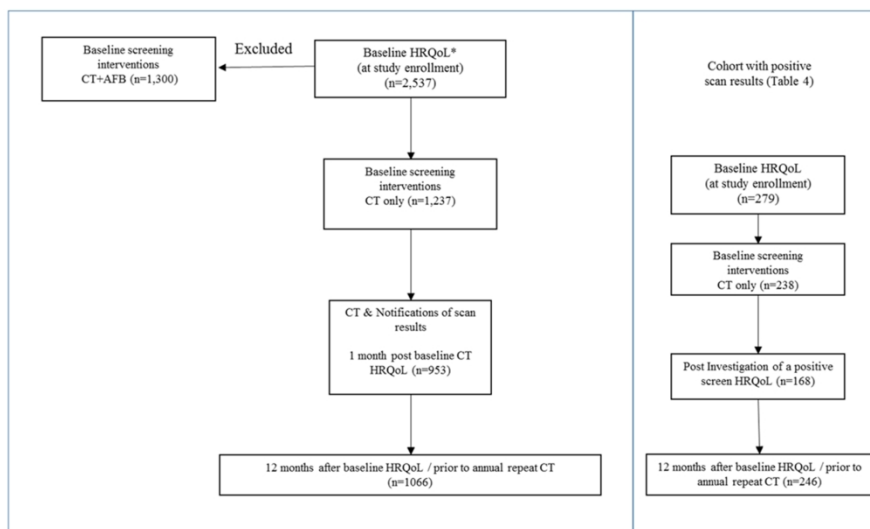

207x146mm (300 x 300 DPI)

1  
2  
3  
4  
5  
6  
7  
8  
9  
10  
11  
12  
13  
14  
15  
16  
17  
18  
19  
20  
21  
22  
23  
24  
25  
26  
27  
28  
29  
30  
31  
32  
33  
34  
35  
36  
37  
38  
39  
40  
41  
42  
43  
44  
45  
46  
47  
48  
49  
50  
51  
52  
53  
54  
55  
56  
57  
58  
59  
60

Figure 2: Changes in EuroQoL Visual Analog Scale (VAS) from baseline to post baseline CT(A), and 12 months after baseline(B).

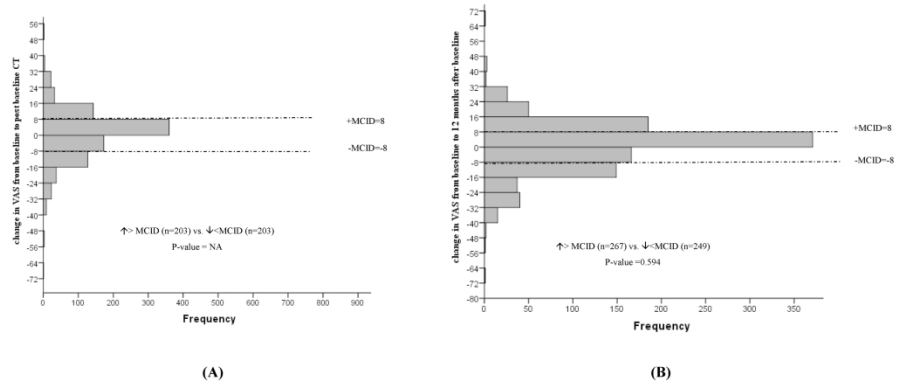

279x361mm (300 x 300 DPI)

Figure 3: Changes in EuroQoL(EQ)-5D-3L from baseline to post baseline CT(A), and 12 months after baseline(B).

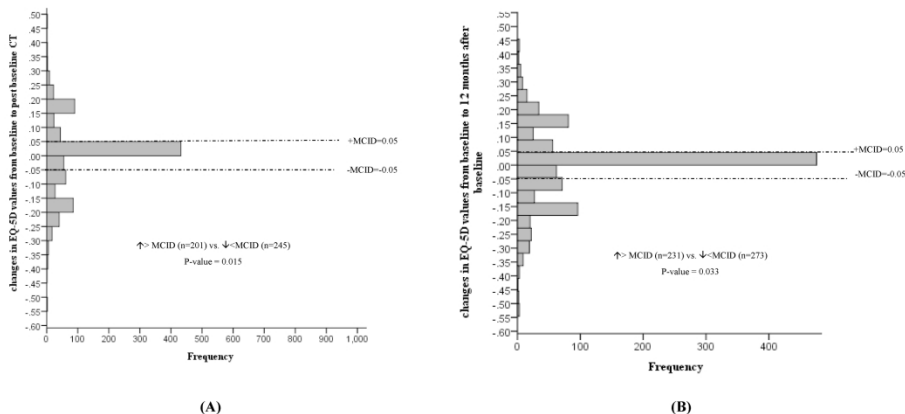

279x361mm (300 x 300 DPI)

1  
2  
3  
4  
5  
6  
7  
8  
9  
10  
11  
12  
13  
14  
15  
16  
17  
18  
19  
20  
21  
22  
23  
24  
25  
26  
27  
28  
29  
30  
31  
32  
33  
34  
35  
36  
37  
38  
39  
40  
41  
42  
43  
44  
45  
46  
47  
48  
49  
50  
51  
52  
53  
54  
55  
56  
57  
58  
59  
60

Figure 4: Changes in 12-item short-form Physical Component Scale(PCS) from baseline to post baseline CT(A), and 12 months after baseline(B).

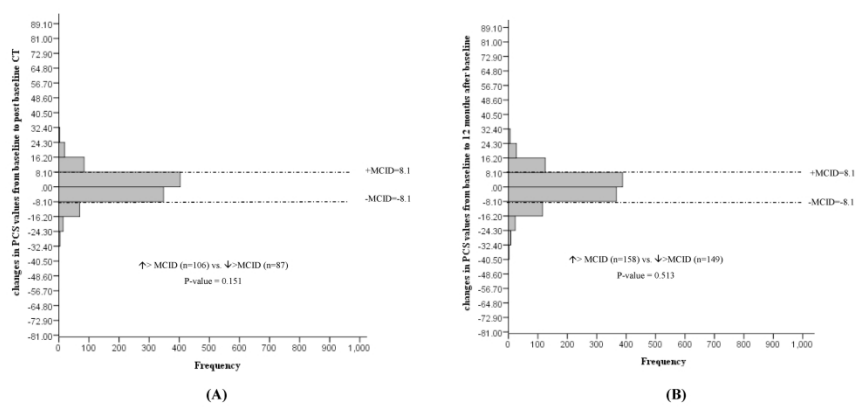

279x361mm (300 x 300 DPI)

Figure 5: Changes in 12-item short-form Mental Component Scale (MCS) from baseline to post baseline CT(A), and 12 months after baseline(B).

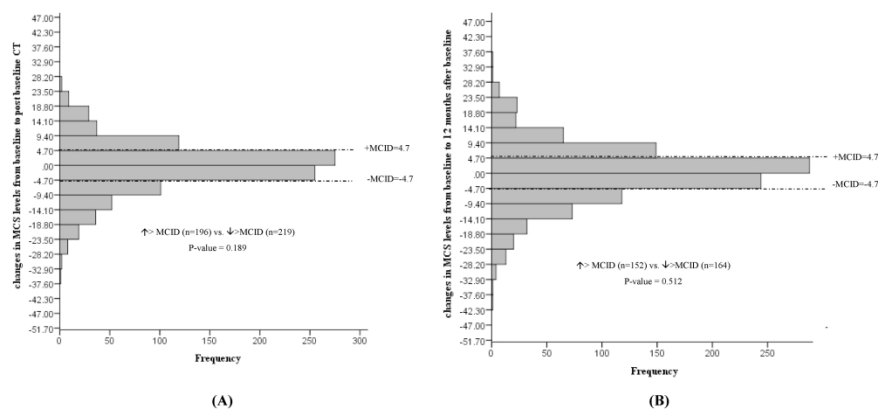

279x361mm (300 x 300 DPI)

1  
2  
3  
4  
5  
6  
7  
8  
9  
10  
11  
12  
13  
14  
15  
16  
17  
18  
19  
20  
21  
22  
23  
24  
25  
26  
27  
28  
29  
30  
31  
32  
33  
34  
35  
36  
37  
38  
39  
40  
41  
42  
43  
44  
45  
46  
47  
48  
49  
50  
51  
52  
53  
54  
55  
56  
57  
58  
59  
60

Figure 6: Changes in Spielberger State Trait Anxiety Inventory (STAI) from baseline to post baseline CT(A), and 12 months after baseline(B).

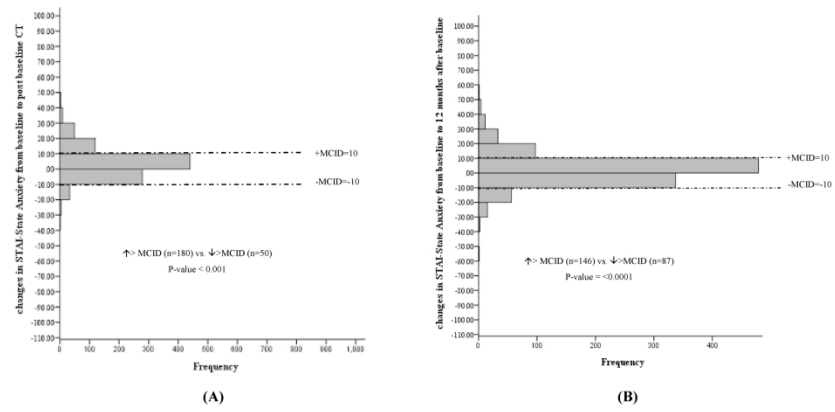

279x361mm (300 x 300 DPI)



Figure 7: Changes in Spielberger State Trait Anxiety Inventory (STAI) from baseline to post baseline CT (A) and post investigation (B) among participants with a positive scan results.

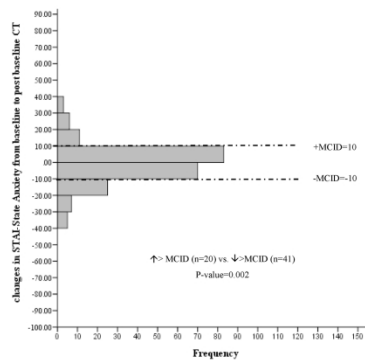

(A)

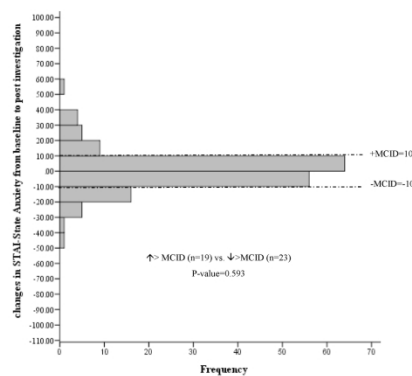

(B)

279x361mm (300 x 300 DPI)

1  
2  
3  
4  
5  
6  
7  
8  
9  
10  
11  
12  
13  
14  
15  
16  
17  
18  
19  
20  
21  
22  
23  
24  
25  
26  
27  
28  
29  
30  
31  
32  
33  
34  
35  
36  
37  
38  
39  
40  
41  
42  
43  
44  
45  
46  
47  
48  
49  
50  
51  
52  
53  
54  
55  
56  
57  
58  
59  
60

Figure 8: Changes in Spielberger State Trait Anxiety Inventory (STAI) from baseline to 12 months among participants with a positive scan results.

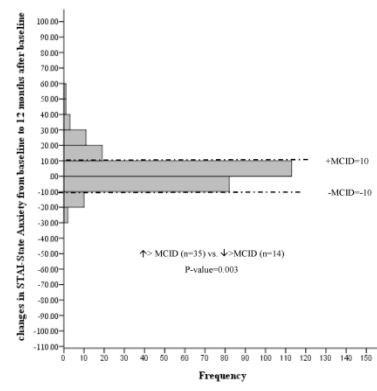

279x361mm (300 x 300 DPI)

## Health-Related Quality of Life and Anxiety in the PAN-CAN Lung Cancer Screening Study

Niloofar Taghizadeh<sup>1</sup>, Alain Tremblay<sup>1</sup>, Sonya Cressman<sup>2</sup>, Stuart Peacock<sup>2</sup>, Annette M. McWilliams<sup>3</sup>, Paul MacEachern<sup>1</sup>, Michael R. Johnston<sup>4</sup>, John Goffin<sup>5</sup>, Glen Goss<sup>6</sup>, Garth Nicholas<sup>6</sup>, Simon Martel<sup>7</sup>, Francis Laberge<sup>7</sup>, Rick Bhatia<sup>8</sup>, Geoffrey Liu<sup>9</sup>, Heidi Schmidt<sup>9</sup>, Sukhinder Atkar-Khattra<sup>2</sup>, Ming-Sound Tsao<sup>9</sup>, Martin C. Tammemagi<sup>10</sup>, Stephen C. Lam<sup>2</sup>, for the Pan-Canadian Early Lung Cancer Study Group.

For peer review only

1  
2  
3 **e-Appendix 1:**  
4  
5  
6

7 **Study design and population**  
8

9 Institutional Review Board (IRB) Approvals:

10 Vancouver: UBC BCCA Research Ethics Board (UBC BCCA REB) H08-01132

11 Calgary: Conjoint Health Research Ethics Board (CHREB) ethics ID: 21852

12 Hamilton: McMaster University Research Ethics Board; ID: 08-367

13 Toronto: University Health Network Research Ethics Board; ID: 08-0576-C

14 Ottawa: The Ottawa Hospital Research Ethics Board; ID 2008581-01H

15 Quebec: Institute Universitaire de Cardiologie et de Pneumologie; ID: CER: 20319

16 Halifax: Capital Health Research Ethics Board; ID: CDHA-RS/2009-097

17 St.John's: Eastern Health Department of Research/Knowledge transfer; ID; HIC#10.070  
18  
19  
20  
21  
22  
23  
24  
25  
26  
27  
28  
29  
30  
31  
32  
33  
34  
35  
36  
37  
38  
39  
40  
41  
42  
43  
44  
45  
46  
47  
48  
49  
50  
51  
52  
53  
54  
55  
56  
57  
58  
59  
60

**Supplementary Table 1 – HRQoL, and anxiety levels in participants with positive baseline LDCT.**

|                                           | <b>Baseline<br/>(n=279)</b> | <b>1-month post baseline CT<br/>scan<br/>Mean, change (95% CI)<br/>(n=238)</b> | <b>Post investigation<br/>Mean, change (95% CI)<br/>(n=168)</b> | <b>12-months after baseline<br/>Mean, change (95% CI)<br/>(n= 246)</b> |
|-------------------------------------------|-----------------------------|--------------------------------------------------------------------------------|-----------------------------------------------------------------|------------------------------------------------------------------------|
| <b>EQ VAS<sup>1</sup></b>                 | 76.2                        | 76.1, -0.21 (-2.54 to 2.13)                                                    | 76.9, 0.89 (-3.28 to 5.07)                                      | 76.4, 0.19 (-1.73 to 2.11)                                             |
| <b>EQ-5D-3L index<br/>values</b>          | 0.84                        | 0.84, -0.00 (-0.03 to 0.03)                                                    | 0.85, 0.00 (-0.03 to 0.04)                                      | 0.83, -0.01 (-0.05 to 0.02)                                            |
| <b>SF-12: PCS<sup>2</sup></b>             | 46.2                        | 46.5, 0.22 (-0.83 to 1.28)                                                     | 46.6, 0.45 (-0.93 to 1.83)                                      | 45.3, -0.86 (-1.90 to 1.67)                                            |
| <b>SF-12: MCS<sup>3</sup></b>             | 51.3                        | 51.2, 0.01 (-1.66 to 1.67)                                                     | 51.4, 0.54 (-2.06 to 3.15)                                      | 51.3, 0.01 (-2.30 to 2.33)                                             |
| <b>STAI-State<br/>Anxiety<sup>4</sup></b> | 29.9                        | 33.2, 3.28 (-0.42 to 6.97)                                                     | 32.9, 2.42 (-1.14 to 5.99)                                      | 31.7, 1.79 (-0.62 to 4.19)                                             |

<sup>1</sup>EQ Visual Analogue Scale “We would like to know how good or bad your health is today” (100 – best imaginable, 0 – worst imaginable).

<sup>2</sup>Physical Health Composite Scores (US population mean = 50 +/- 10), with higher score corresponding to better state.

<sup>3</sup>Mental Health Composite Scores (US population mean = 50 +/- 10), with higher score corresponding to better state.

<sup>4</sup>STAI-State score >39 considered clinically significant symptoms.

**Supplementary Table 2 - Proportion of different levels of EQ-5D-3L dimensions by study visits (Total n=1237).**

| EQ-5D-3L Dimensions, n (%)                               | Baseline (n=1237) | 1 month post baseline CT scan (n=953) | 12 months after baseline (n=1066) |
|----------------------------------------------------------|-------------------|---------------------------------------|-----------------------------------|
| <b>Overall score missing</b>                             | 9 (0.7)           | 12 (1.3)                              | 16 (1.5)                          |
| <b>Mobility</b>                                          |                   |                                       |                                   |
| I have no problems in walking about                      | 918 (74.2)        | 705 (74.0)                            | 782 (73.4)                        |
| I have some problems in walking about                    | 311 (25.2)        | 240 (25.2)                            | 278 (26.1)                        |
| I am confined to bed                                     | 4 (0.3)           | 3 (0.3)                               | 0 (0.0)                           |
| Missing                                                  | 4 (0.3)           | 5 (0.5)                               | 6 (0.6)                           |
| <b>Self-care</b>                                         |                   |                                       |                                   |
| I have no problems with self-care                        | 1191 (96.2)       | 914 (95.9)                            | 1018 (95.5)                       |
| I have some problems washing or dressing myself          | 36 (2.9)          | 31 (3.3)                              | 39 (3.7)                          |
| I am unable to wash or dress myself                      | 7 (0.6)           | 2 (0.2)                               | 3 (0.3)                           |
| Missing                                                  | 3 (0.3)           | 6 (0.6)                               | 6 (0.6)                           |
| <b>Usual activities</b>                                  |                   |                                       |                                   |
| I have no problems with performing my usual activities   | 930 (75.1)        | 710 (74.5)                            | 785 (73.6)                        |
| I have some problems with performing my usual activities | 284 (22.9)        | 228 (23.9)                            | 261 (24.5)                        |
| I am unable to perform my usual activities               | 18 (1.5)          | 8 (0.8)                               | 15 (1.4)                          |
| Missing                                                  | 5 (0.5)           | 7 (0.7)                               | 5 (0.5)                           |
| <b>Pain/discomfort</b>                                   |                   |                                       |                                   |
| I have no pain or discomfort                             | 575 (46.4)        | 471 (49.4)                            | 498 (46.7)                        |
| I have moderate pain or discomfort                       | 622 (50.2)        | 443 (46.5)                            | 520 (48.8)                        |
| I have extreme pain or discomfort                        | 36 (2.9)          | 33 (3.5)                              | 40 (3.8)                          |
| Missing                                                  | 4 (0.4)           | 6 (0.6)                               | 8 (0.8)                           |
| <b>Anxiety/depression</b>                                |                   |                                       |                                   |
| I am not anxious or depressed                            | 835 (64.4)        | 610 (64.0)                            | 708 (66.4)                        |
| I am moderately anxious or depressed                     | 375 (30.3)        | 307 (32.2)                            | 332 (31.1)                        |
| I am extremely anxious or depressed                      | 23 (1.9)          | 28 (2.9)                              | 19 (1.8)                          |
| Missing                                                  | 4 (0.4)           | 8 (0.8)                               | 7 (0.7)                           |

Supplementary Table 3- Proportion of different levels of SF\_12 dimensions by study visits (Total n=2537).

| SF_12 Dimensions                                           | Baseline (n=1237) | 1 month post baseline CT scan (n=953) | 12 months after baseline (n=1066) |
|------------------------------------------------------------|-------------------|---------------------------------------|-----------------------------------|
| <b>General health, n (%)</b>                               |                   |                                       |                                   |
| Excellent                                                  | 93 (7.5)          | 85 (8.9)                              | 89 (8.3)                          |
| Very good                                                  | 453 (36.6)        | 367 (38.5)                            | 392 (36.8)                        |
| Good                                                       | 532 (43.0)        | 381 (40.0)                            | 450 (42.2)                        |
| Fair                                                       | 138 (11.1)        | 105 (11.0)                            | 108 (10.1)                        |
| Poor                                                       | 18 (1.5)          | 12 (1.3)                              | 20 (1.9)                          |
| Missing                                                    | 3 (0.3)           | 3 (0.3)                               | 7 (0.7)                           |
| <b>Moderate activities</b>                                 |                   |                                       |                                   |
| Yes, limited a lot                                         | 97 (7.8)          | 77 (8.1)                              | 75 (7.0)                          |
| Yes, limited a little                                      | 310 (25.0)        | 256 (26.9)                            | 267 (25.0)                        |
| No, not limited at all                                     | 827 (66.8)        | 617 (64.7)                            | 714 (67.0)                        |
| Missing                                                    | 3 (0.3)           | 3 (0.3)                               | 10 (0.9)                          |
| <b>Climbing several flights of stairs</b>                  |                   |                                       |                                   |
| Yes, limited a lot                                         | 191 (15.4)        | 140 (14.7)                            | 161 (15.1)                        |
| Yes, limited a little                                      | 551 (44.5)        | 432 (45.3)                            | 462 (43.3)                        |
| No, not limited at all                                     | 491 (39.7)        | 376 (39.5)                            | 436 (40.9)                        |
| Missing                                                    | 4 (0.3)           | 5 (0.5)                               | 7 (0.7)                           |
| <b>Accomplished less than you would like (physically)</b>  |                   |                                       |                                   |
| Yes                                                        | 335 (27.1)        | 221 (23.2)                            | 265 (24.9)                        |
| No                                                         | 899 (72.6)        | 727 (76.3)                            | 795 (74.6)                        |
| Missing                                                    | 3 (0.3)           | 5 (0.5)                               | 6 (0.6)                           |
| <b>Limited in kind of activities</b>                       |                   |                                       |                                   |
| Yes                                                        | 299 (24.2)        | 221 (23.2)                            | 265 (24.9)                        |
| No                                                         | 934 (75.4)        | 729 (76.5)                            | 795 (74.6)                        |
| Missing                                                    | 4 (0.4)           | 3 (0.3)                               | 6 (0.6)                           |
| <b>Accomplished less than you would like (emotionally)</b> |                   |                                       |                                   |
| Yes                                                        | 251 (20.3)        | 212 (22.2)                            | 222 (20.8)                        |
| No                                                         | 982 (79.3)        | 735 (77.1)                            | 833 (78.1)                        |
| Missing                                                    | 4 (0.4)           | 6 (0.6)                               | 11 (1.0)                          |
| <b>Did not do activities as carefully as usual</b>         |                   |                                       |                                   |
| Yes                                                        | 215 (17.4)        | 181 (19.0)                            | 181 (17.0)                        |
| No                                                         | 1018 (82.2)       | 764 (80.2)                            | 875 (82.1)                        |
| Missing                                                    | 4 (0.4)           | 8 (0.8)                               | 10 (0.9)                          |
| <b>Pain interferes with normal work</b>                    |                   |                                       |                                   |
| Not at all                                                 | 596 (48.1)        | 479 (50.3)                            | 515 (48.3)                        |
| A little bit                                               | 312 (25.2)        | 243 (25.5)                            | 288 (27.0)                        |
| Moderately                                                 | 194 (15.7)        | 138 (14.5)                            | 142 (13.3)                        |
| Quite a bit                                                | 109 (8.8)         | 77 (8.1)                              | 98 (9.2)                          |
| Extremely                                                  | 20 (1.6)          | 13 (1.4)                              | 18 (1.7)                          |
| Missing                                                    | 6 (0.5)           | 3 (0.3)                               | 5 (0.5)                           |
| <b>Felt calm and peaceful</b>                              |                   |                                       |                                   |
| All of the time                                            | 87 (7.0)          | 73 (7.7)                              | 84 (7.9)                          |
| Most of the time                                           | 630 (50.9)        | 460 (48.3)                            | 527 (49.4)                        |
| A good bit of the time                                     | 184 (14.9)        | 163 (17.1)                            | 176 (16.5)                        |
| Some of the time                                           | 214 (17.3)        | 171 (17.9)                            | 164 (15.4)                        |
| A little of the time                                       | 96 (7.8)          | 70 (7.3)                              | 88 (8.3)                          |
| None of the time                                           | 23 (1.9)          | 11 (1.2)                              | 18 (1.7)                          |
| Missing                                                    | 3 (0.3)           | 5 (0.5)                               | 9 (0.8)                           |
| <b>Have a lot of energy</b>                                |                   |                                       |                                   |
| All of the time                                            | 36 (2.9)          | 36 (3.8)                              | 41 (3.8)                          |
| Most of the time                                           | 416 (33.6)        | 317 (33.3)                            | 375 (35.2)                        |
| A good bit of the time                                     | 263 (21.2)        | 206 (21.6)                            | 213 (20.0)                        |
| Some of the time                                           | 322 (26.0)        | 240 (25.2)                            | 249 (23.4)                        |
| A little of the time                                       | 156 (12.6)        | 116 (12.2)                            | 145 (13.6)                        |
| None of the time                                           | 41 (3.3)          | 34 (3.6)                              | 34 (3.2)                          |
| Missing                                                    | 3 (0.3)           | 4 (0.4)                               | 9 (0.8)                           |
| <b>Felt downhearted and blue</b>                           |                   |                                       |                                   |
| All of the time                                            | 4 (0.3)           | 5 (0.5)                               | 4 (0.4)                           |
| Most of the time                                           | 37 (3.0)          | 37 (3.9)                              | 34 (3.2)                          |
| A good bit of the time                                     | 79 (6.4)          | 51 (5.4)                              | 76 (7.1)                          |
| Some of the time                                           | 273 (22.1)        | 196 (20.6)                            | 216 (20.3)                        |
| A little of the time                                       | 480 (38.8)        | 399 (41.9)                            | 414 (38.8)                        |
| None of the time                                           | 361 (29.2)        | 261 (27.4)                            | 312 (29.3)                        |
| Missing                                                    | 3 (0.3)           | 4 (0.4)                               | 10 (0.9)                          |
| <b>Health interferes/social activities</b>                 |                   |                                       |                                   |
| All of the time                                            | 8 (0.6)           | 10 (1.0)                              | 16 (1.5)                          |
| Most of the time                                           | 63 (5.1)          | 42 (4.4)                              | 54 (5.1)                          |
| Some of the time                                           | 203 (16.4)        | 150 (15.7)                            | 169 (15.9)                        |
| A little of the time                                       | 238 (19.2)        | 182 (19.1)                            | 200 (18.8)                        |
| None of the time                                           | 722 (58.3)        | 565 (59.3)                            | 617 (57.9)                        |
| Missing                                                    | 3 (0.3)           | 4 (0.4)                               | 10 (0.9)                          |

Supplementary Table 4- Proportion of different levels of State anxiety dimensions by study visits (Total n=2537).

1  
2  
3  
4  
5  
6  
7  
8  
9  
10  
11  
12  
13  
14  
15  
16  
17  
18  
19  
20  
21  
22  
23  
24  
25  
26  
27  
28  
29  
30  
31  
32  
33  
34  
35  
36  
37  
38  
39  
40  
41  
42  
43  
44  
45  
46  
47

| State<br>Dimensions                                  | Baseline<br>(n=1237) |            |               |              |         | 1 month post baseline CT scan<br>(n=953) |            |               |              |         | 12 months after baseline (n=1066) |            |               |              |          |
|------------------------------------------------------|----------------------|------------|---------------|--------------|---------|------------------------------------------|------------|---------------|--------------|---------|-----------------------------------|------------|---------------|--------------|----------|
|                                                      | Not at all           | Somewhat   | Moderately so | Very much so | Missing | Not at all                               | Somewhat   | Moderately so | Very much so | Missing | Not at all                        | Somewhat   | Moderately so | Very much so | Missing  |
| 1 feel calm                                          | 17 (1.4)             | 167 (13.5) | 407 (32.9)    | 643 (51.9)   | 3 (0.3) | 31 (3.3)                                 | 136 (14.3) | 338 (35.5)    | 442 (46.4)   | 6 (0.6) | 18 (1.7)                          | 131 (12.3) | 393 (36.9)    | 516 (48.4)   | 8 (0.8)  |
| 2 feel secure                                        | 16 (1.3)             | 106 (8.6)  | 304 (24.6)    | 808 (65.3)   | 3 (0.3) | 21 (2.2)                                 | 115 (12.1) | 283 (29.7)    | 528 (55.4)   | 6 (0.6) | 24 (2.3)                          | 83 (7.8)   | 330 (31.0)    | 621 (58.3)   | 8 (0.8)  |
| 3 feel tense                                         | 685 (55.3)           | 319 (25.8) | 192 (15.5)    | 36 (2.9)     | 3 (0.3) | 465 (48.8)                               | 300 (31.5) | 144 (15.1)    | 39 (4.1)     | 5 (0.5) | 562 (52.7)                        | 282 (26.5) | 177 (16.6)    | 35 (3.3)     | 10 (1.0) |
| 4 feel strained                                      | 834 (67.4)           | 231 (18.7) | 131 (10.6)    | 38 (3.1)     | 3 (0.3) | 543 (57.0)                               | 261 (27.4) | 109 (11.4)    | 35 (3.7)     | 5 (0.5) | 652 (61.2)                        | 240 (22.5) | 134 (12.6)    | 33 (3.1)     | 7 (0.7)  |
| 5 feel at ease                                       | 41 (3.3)             | 154 (12.4) | 361 (29.2)    | 678 (54.8)   | 3 (0.3) | 45 (4.7)                                 | 154 (16.2) | 289 (30.3)    | 460 (48.3)   | 5 (0.5) | 27 (2.5)                          | 170 (15.9) | 323 (30.3)    | 538 (50.5)   | 8 (0.8)  |
| 6 feel upset                                         | 1003 (81.0)          | 137 (11.1) | 75 (6.1)      | 19 (1.5)     | 3 (0.3) | 660 (69.3)                               | 182 (19.1) | 78 (8.2)      | 28 (2.9)     | 5 (0.5) | 792 (74.3)                        | 175 (16.4) | 75 (7.0)      | 16 (1.5)     | 8 (0.8)  |
| 7 am presently worrying<br>over possible misfortunes | 694 (56.1)           | 332 (26.8) | 156 (12.6)    | 52 (4.2)     | 3 (0.3) | 480 (50.4)                               | 295 (31.0) | 121 (12.7)    | 52 (5.5)     | 5 (0.5) | 555 (52.1)                        | 339 (31.8) | 115 (10.8)    | 49 (4.6)     | 8 (0.8)  |
| 8 feel satisfied                                     | 36 (2.9)             | 193 (15.6) | 469 (37.9)    | 536 (43.3)   | 3 (0.3) | 47 (4.9)                                 | 167 (17.5) | 324 (34.0)    | 410 (43.0)   | 5 (0.5) | 33 (3.1)                          | 192 (18.0) | 378 (35.5)    | 456 (42.8)   | 7 (0.7)  |
| 9 feel frightened                                    | 1008 (81.4)          | 149 (12.0) | 56 (4.5)      | 21 (1.7)     | 3 (0.3) | 718 (75.3)                               | 150 (15.7) | 59 (6.2)      | 21 (2.2)     | 5 (0.5) | 846 (79.4)                        | 148 (13.9) | 53 (5.0)      | 11 (1.0)     | 8 (0.8)  |
| 10 feel comfortable                                  | 30 (2.4)             | 133 (10.7) | 352 (28.4)    | 719 (58.1)   | 3 (0.3) | 31 (3.3)                                 | 135 (14.2) | 291 (30.5)    | 490 (51.4)   | 6 (0.6) | 23 (2.2)                          | 142 (13.3) | 333 (31.2)    | 561 (52.6)   | 7 (0.7)  |
| 11 feel self-confident                               | 36 (2.9)             | 127 (10.3) | 439 (35.5)    | 632 (51.1)   | 3 (0.3) | 38 (4.0)                                 | 106 (11.1) | 359 (37.7)    | 445 (46.7)   | 5 (0.5) | 24 (2.3)                          | 127 (11.9) | 394 (37.0)    | 514 (48.2)   | 7 (0.7)  |
| 12 feel nervous                                      | 780 (63.0)           | 308 (24.9) | 117 (9.5)     | 29 (2.3)     | 3 (0.3) | 559 (58.7)                               | 255 (26.8) | 99 (10.4)     | 35 (3.7)     | 5 (0.5) | 662 (62.1)                        | 261 (24.5) | 114 (10.7)    | 22 (2.1)     | 7 (0.7)  |
| 13 am jittery                                        | 968 (78.2)           | 174 (14.1) | 73 (5.9)      | 18 (1.5)     | 4 (0.4) | 692 (72.6)                               | 152 (15.9) | 77 (8.1)      | 27 (2.8)     | 5 (0.5) | 811 (76.1)                        | 155 (14.5) | 77 (7.2)      | 15 (1.4)     | 8 (0.8)  |
| 14 feel indecisive                                   | 846 (68.3)           | 269 (21.7) | 97 (7.8)      | 22 (1.8)     | 3 (0.3) | 557 (58.4)                               | 246 (25.8) | 113 (11.9)    | 32 (3.4)     | 5 (0.5) | 662 (62.1)                        | 256 (24.0) | 100 (9.4)     | 39 (3.7)     | 9 (0.9)  |
| 15 am relaxed                                        | 48 (3.9)             | 181 (14.6) | 394 (31.8)    | 611 (49.4)   | 3 (0.3) | 52 (5.5)                                 | 173 (18.2) | 313 (32.8)    | 409 (42.9)   | 6 (0.6) | 30 (2.8)                          | 172 (16.1) | 377 (35.4)    | 480 (45.0)   | 7 (0.7)  |
| 16 feel content                                      | 48 (3.9)             | 161 (13.0) | 436 (35.2)    | 589 (47.6)   | 3 (0.3) | 52 (5.5)                                 | 147 (15.4) | 339 (35.6)    | 410 (43.0)   | 5 (0.5) | 37 (3.5)                          | 151 (14.2) | 408 (38.3)    | 463 (43.4)   | 7 (0.7)  |
| 17 am worried                                        | 651 (52.6)           | 390 (31.5) | 146 (11.8)    | 47 (3.8)     | 3 (0.3) | 423 (44.4)                               | 333 (34.9) | 134 (14.1)    | 58 (6.1)     | 5 (0.5) | 518 (48.6)                        | 361 (33.9) | 129 (12.1)    | 51 (4.8)     | 7 (0.7)  |
| 18 feel confused                                     | 1075 (86.8)          | 112 (9.0)  | 32 (2.6)      | 12 (1.0)     | 6 (0.5) | 755 (79.2)                               | 135 (14.2) | 40 (4.2)      | 18 (1.9)     | 5 (0.5) | 887 (83.2)                        | 99 (9.3)   | 50 (4.7)      | 20 (1.9)     | 10 (1.0) |
| 19 feel steady                                       | 43 (3.5)             | 141 (11.4) | 327 (26.4)    | 720 (58.2)   | 6 (0.5) | 43 (4.5)                                 | 126 (13.2) | 272 (28.5)    | 507 (53.2)   | 5 (0.5) | 41 (3.8)                          | 120 (11.3) | 316 (29.6)    | 581 (54.5)   | 8 (0.8)  |
| 20 feel pleasant                                     | 25 (2.0)             | 118 (9.5)  | 416 (33.6)    | 672 (54.3)   | 6 (0.5) | 30 (3.1)                                 | 117 (12.3) | 319 (33.5)    | 482 (50.6)   | 5 (0.5) | 25 (2.3)                          | 115 (10.8) | 365 (34.2)    | 552 (51.8)   | 9 (0.9)  |



STROBE Statement—Checklist of items that should be included in reports of *cohort studies*

| PAGE                |                              | Item No | Recommendation                                                                                                                                                                                    |
|---------------------|------------------------------|---------|---------------------------------------------------------------------------------------------------------------------------------------------------------------------------------------------------|
| 4                   | <b>Title and abstract</b>    | 1       | (a) Indicate the study's design with a commonly used term in the title or the abstract                                                                                                            |
| 4                   |                              |         | (b) Provide in the abstract an informative and balanced summary of what was done and what was found                                                                                               |
| <b>Introduction</b> |                              |         |                                                                                                                                                                                                   |
| 6                   | Background/rationale         | 2       | Explain the scientific background and rationale for the investigation being reported                                                                                                              |
| 7                   | Objectives                   | 3       | State specific objectives, including any prespecified hypotheses                                                                                                                                  |
| <b>Methods</b>      |                              |         |                                                                                                                                                                                                   |
| 8                   | Study design                 | 4       | Present key elements of study design early in the paper                                                                                                                                           |
| 8                   | Setting                      | 5       | Describe the setting, locations, and relevant dates, including periods of recruitment, exposure, follow-up, and data collection                                                                   |
| 8                   | Participants                 | 6       | (a) Give the eligibility criteria, and the sources and methods of selection of participants. Describe methods of follow-up                                                                        |
| n/a                 |                              |         | (b) For matched studies, give matching criteria and number of exposed and unexposed                                                                                                               |
| 8-9                 | Variables                    | 7       | Clearly define all outcomes, exposures, predictors, potential confounders, and effect modifiers. Give diagnostic criteria, if applicable                                                          |
| 9                   | Data sources/<br>measurement | 8*      | For each variable of interest, give sources of data and details of methods of assessment (measurement). Describe comparability of assessment methods if there is more than one group              |
| n.a.                | Bias                         | 9       | Describe any efforts to address potential sources of bias                                                                                                                                         |
| 11                  | Study size                   | 10      | Explain how the study size was arrived at                                                                                                                                                         |
| 10                  | Quantitative variables       | 11      | Explain how quantitative variables were handled in the analyses. If applicable, describe which groupings were chosen and why                                                                      |
| 10                  | Statistical methods          | 12      | (a) Describe all statistical methods, including those used to control for confounding                                                                                                             |
| 10                  |                              |         | (b) Describe any methods used to examine subgroups and interactions                                                                                                                               |
| 10                  |                              |         | (c) Explain how missing data were addressed                                                                                                                                                       |
| 10                  |                              |         | (d) If applicable, explain how loss to follow-up was addressed                                                                                                                                    |
| n/a                 |                              |         | (e) Describe any sensitivity analyses                                                                                                                                                             |
| <b>Results</b>      |                              |         |                                                                                                                                                                                                   |
| 12                  | Participants                 | 13*     | (a) Report numbers of individuals at each stage of study—eg numbers potentially eligible, examined for eligibility, confirmed eligible, included in the study, completing follow-up, and analysed |
| n.a.                |                              |         | (b) Give reasons for non-participation at each stage                                                                                                                                              |
| FIG 1               |                              |         | (c) Consider use of a flow diagram                                                                                                                                                                |
| 12                  | Descriptive data             | 14*     | (a) Give characteristics of study participants (eg demographic, clinical, social) and information on exposures and potential confounders                                                          |
| 14                  |                              |         | (b) Indicate number of participants with missing data for each variable of interest                                                                                                               |
| n.a.                |                              |         | (c) Summarise follow-up time (eg, average and total amount)                                                                                                                                       |
| 14-17               | Outcome data                 | 15*     | Report numbers of outcome events or summary measures over time                                                                                                                                    |
| 14-17               | Main results                 | 16      | (a) Give unadjusted estimates and, if applicable, confounder-adjusted estimates and their precision (eg, 95% confidence interval). Make clear                                                     |

|    |                          |                  |                                                                                 |
|----|--------------------------|------------------|---------------------------------------------------------------------------------|
| 1  |                          |                  | which confounders were adjusted for and why they were included                  |
| 2  | n.a.                     |                  | (b) Report category boundaries when continuous variables were categorized       |
| 3  |                          |                  | (c) If relevant, consider translating estimates of relative risk into absolute  |
| 4  | 14, 16                   |                  | risk for a meaningful time period                                               |
| 5  |                          |                  |                                                                                 |
| 6  | Suppl                    | Other analyses   | 17 Report other analyses done—eg analyses of subgroups and interactions, and    |
| 7  |                          |                  | sensitivity analyses                                                            |
| 8  |                          |                  |                                                                                 |
| 9  | <b>Discussion</b>        |                  |                                                                                 |
| 10 | 18                       | Key results      | 18 Summarise key results with reference to study objectives                     |
| 11 |                          |                  |                                                                                 |
| 12 | 20                       | Limitations      | 19 Discuss limitations of the study, taking into account sources of potential   |
| 13 |                          |                  | bias or imprecision. Discuss both direction and magnitude of any potential      |
| 14 |                          |                  | bias                                                                            |
| 15 | 21-22                    | Interpretation   | 20 Give a cautious overall interpretation of results considering objectives,    |
| 16 |                          |                  | limitations, multiplicity of analyses, results from similar studies, and other  |
| 17 |                          |                  | relevant evidence                                                               |
| 18 |                          |                  |                                                                                 |
| 19 | 22                       | Generalisability | 21 Discuss the generalisability (external validity) of the study results        |
| 20 |                          |                  |                                                                                 |
| 21 | <b>Other information</b> |                  |                                                                                 |
| 22 | 23                       | Funding          | 22 Give the source of funding and the role of the funders for the present study |
| 23 |                          |                  | and, if applicable, for the original study on which the present article is      |
| 24 |                          |                  | based                                                                           |
| 25 |                          |                  |                                                                                 |

\*Give information separately for exposed and unexposed groups.

**Note:** An Explanation and Elaboration article discusses each checklist item and gives methodological background and published examples of transparent reporting. The STROBE checklist is best used in conjunction with this article (freely available on the Web sites of PLoS Medicine at <http://www.plosmedicine.org/>, Annals of Internal Medicine at <http://www.annals.org/>, and Epidemiology at <http://www.epidem.com/>). Information on the STROBE Initiative is available at <http://www.strobe-statement.org>.
