# Supplementary material for: Health-related quality of life and anxiety in the PAN-CAN lung cancer screening cohort
Source: PubMed Central journal article supplement — BMJ Open. 2019 Jan 17;9(1):e024719. doi: 10.1136/bmjopen-2018-024719 (PMC6340441; doi:10.1136/bmjopen-2018-024719), 2019-01-17
Supplement: bmjopen-2018-024719supp001.pdf [file bmjopen-2018-024719supp001.pdf]

## **Health-Related Quality of Life and Anxiety in the PAN-CAN Lung Cancer Screening Study**

Niloofar Taghizadeh<sup>1</sup>, Alain Tremblay<sup>1</sup>, Sonya Cressman<sup>2</sup>, Stuart Peacock<sup>2</sup>, Annette M. McWilliams<sup>3</sup>, Paul MacEachern<sup>1</sup>, Michael R. Johnston<sup>4</sup>, John Goffin<sup>5</sup>, Glen Goss<sup>6</sup>, Garth Nicholas<sup>6</sup>, Simon Martel<sup>7</sup>, Francis Laberge<sup>7</sup>, Rick Bhatia<sup>8</sup>, Geoffrey Liu<sup>9</sup>, Heidi Schmidt<sup>9</sup>, Sukhinder Atkar-Khattra<sup>2</sup>, Ming-Sound Tsao<sup>9</sup>, Martin C. Tammemagi<sup>10</sup>, Stephen C. Lam<sup>2</sup>, for the Pan-Canadian Early Lung Cancer Study Group.

## **e-Appendix 1:**

### **Study design and population**

Institutional Review Board (IRB) Approvals:

Vancouver: UBC BCCA Research Ethics Board (UBC BCCA REB) H08-01132

Calgary: Conjoint Health Research Ethics Board (CHREB) ethics ID: 21852

Hamilton: McMaster University Research Ethics Board; ID: 08-367

Toronto: University Health Network Research Ethics Board; ID: 08-0576-C

Ottawa: The Ottawa Hospital Research Ethics Board; ID 2008581-01H

Quebec: Institute Universitaire de Cardiologie et de Pneumologie; ID: CER: 20319

Halifax: Capital Health Research Ethics Board; ID: CDHA-RS/2009-097

St.John's: Eastern Health Department of Research/Knowledge transfer; ID; HIC#10.070

**Supplementary Table 1 – HRQoL, and anxiety levels in participants with positive baseline LDCT.**

|                                           | <b>Baseline<br/>(n=279)</b> | <b>1-month post baseline CT<br/>scan<br/>Mean, change (95% CI)<br/>(n=238)</b> | <b>Post investigation<br/>Mean, change (95% CI)<br/>(n=168)</b> | <b>12-months after baseline<br/>Mean, change (95% CI)<br/>(n= 246)</b> |
|-------------------------------------------|-----------------------------|--------------------------------------------------------------------------------|-----------------------------------------------------------------|------------------------------------------------------------------------|
| <b>EQ VAS<sup>1</sup></b>                 | 76.2                        | 76.1, -0.21 (-2.54 to 2.13)                                                    | 76.9, 0.89 (-3.28 to 5.07)                                      | 76.4, 0.19 (-1.73 to 2.11)                                             |
| <b>EQ-5D-3L index<br/>values</b>          | 0.84                        | 0.84, -0.00 (-0.03 to 0.03)                                                    | 0.85, 0.00 (-0.03 to 0.04)                                      | 0.83, -0.01 (-0.05 to 0.02)                                            |
| <b>SF-12: PCS<sup>2</sup></b>             | 46.2                        | 46.5, 0.22 (-0.83 to 1.28)                                                     | 46.6, 0.45 (-0.93 to 1.83)                                      | 45.3, -0.86 (-1.90 to 1.67)                                            |
| <b>SF-12: MCS<sup>3</sup></b>             | 51.3                        | 51.2, 0.01 (-1.66 to 1.67)                                                     | 51.4, 0.54 (-2.06 to 3.15)                                      | 51.3, 0.01 (-2.30 to 2.33)                                             |
| <b>STAI-State<br/>Anxiety<sup>4</sup></b> | 29.9                        | 33.2, 3.28 (-0.42 to 6.97)                                                     | 32.9, 2.42 (-1.14 to 5.99)                                      | 31.7, 1.79 (-0.62 to 4.19)                                             |

<sup>1</sup>EQ Visual Analogue Scale “We would like to know how good or bad your health is today” (100 – best imaginable, 0 – worst imaginable).

<sup>2</sup> Physical Health Composite Scores (US population mean = 50 +/- 10), with higher score corresponding to better state.

<sup>3</sup> Mental Health Composite Scores (US population mean = 50 +/- 10), with higher score corresponding to better state.

<sup>4</sup> STAI-State score >39 considered clinically significant symptoms.

**Supplementary Table 2 - Proportion of different levels of EQ-5D-3L dimensions by study visits (Total n=1237).**

| <b>EQ-5D-3L Dimensions, n (%)</b>                        | <b>Baseline (n=1237)</b> | <b>1 month post baseline CT scan (n=953)</b> | <b>12 months after baseline (n=1066)</b> |
|----------------------------------------------------------|--------------------------|----------------------------------------------|------------------------------------------|
| <b>Overall score missing</b>                             | 9 (0.7)                  | 12 (1.3)                                     | 16 (1.5)                                 |
| <b>Mobility</b>                                          |                          |                                              |                                          |
| I have no problems in walking about                      | 918 (74.2)               | 705 (74.0)                                   | 782 (73.4)                               |
| I have some problems in walking about                    | 311 (25.2)               | 240 (25.2)                                   | 278 (26.1)                               |
| I am confined to bed                                     | 4 (0.3)                  | 3 (0.3)                                      | 0 (0.0)                                  |
| Missing                                                  | 4 (0.3)                  | 5 (0.5)                                      | 6 (0.6)                                  |
| <b>Self-care</b>                                         |                          |                                              |                                          |
| I have no problems with self-care                        | 1191 (96.2)              | 914 (95.9)                                   | 1018 (95.5)                              |
| I have some problems washing or dressing myself          | 36 (2.9)                 | 31 (3.3)                                     | 39 (3.7)                                 |
| I am unable to wash or dress myself                      | 7 (0.6)                  | 2 (0.2)                                      | 3 (0.3)                                  |
| Missing                                                  | 3 (0.3)                  | 6 (0.6)                                      | 6 (0.6)                                  |
| <b>Usual activities</b>                                  |                          |                                              |                                          |
| I have no problems with performing my usual activities   | 930 (75.1)               | 710 (74.5)                                   | 785 (73.6)                               |
| I have some problems with performing my usual activities | 284 (22.9)               | 228 (23.9)                                   | 261 (24.5)                               |
| I am unable to perform my usual activities               | 18 (1.5)                 | 8 (0.8)                                      | 15 (1.4)                                 |
| Missing                                                  | 5 (0.5)                  | 7 (0.7)                                      | 5 (0.5)                                  |
| <b>Pain/discomfort</b>                                   |                          |                                              |                                          |
| I have no pain or discomfort                             | 575 (46.4)               | 471 (49.4)                                   | 498 (46.7)                               |
| I have moderate pain or discomfort                       | 622 (50.2)               | 443 (46.5)                                   | 520 (48.8)                               |
| I have extreme pain or discomfort                        | 36 (2.9)                 | 33 (3.5)                                     | 40 (3.8)                                 |
| Missing                                                  | 4 (0.4)                  | 6 (0.6)                                      | 8 (0.8)                                  |
| <b>Anxiety/depression</b>                                |                          |                                              |                                          |
| I am not anxious or depressed                            | 835 (64.4)               | 610 (64.0)                                   | 708 (66.4)                               |
| I am moderately anxious or depressed                     | 375 (30.3)               | 307 (32.2)                                   | 332 (31.1)                               |
| I am extremely anxious or depressed                      | 23 (1.9)                 | 28 (2.9)                                     | 19 (1.8)                                 |
| Missing                                                  | 4 (0.4)                  | 8 (0.8)                                      | 7 (0.7)                                  |

**Supplementary Table 3- Proportion of different levels of SF\_12 dimensions by study visits (Total n=2537).**

| SF_12 Dimensions                                           | Baseline (n=1237) | 1 month post baseline CT scan (n=953) | 12 months after baseline (n=1066) |
|------------------------------------------------------------|-------------------|---------------------------------------|-----------------------------------|
| <b>General health, n (%)</b>                               |                   |                                       |                                   |
| Excellent                                                  | 93 (7.5)          | 85 (8.9)                              | 89 (8.3)                          |
| Very good                                                  | 453 (36.6)        | 367 (38.5)                            | 392 (36.8)                        |
| Good                                                       | 532 (43.0)        | 381 (40.0)                            | 450 (42.2)                        |
| Fair                                                       | 138 (11.1)        | 105 (11.0)                            | 108 (10.1)                        |
| Poor                                                       | 18 (1.5)          | 12 (1.3)                              | 20 (1.9)                          |
| Missing                                                    | 3 (0.3)           | 3 (0.3)                               | 7 (0.7)                           |
| <b>Moderate activities</b>                                 |                   |                                       |                                   |
| Yes, limited a lot                                         | 97 (7.8)          | 77 (8.1)                              | 75 (7.0)                          |
| Yes, limited a little                                      | 310 (25.0)        | 256 (26.9)                            | 267 (25.0)                        |
| No, not limited at all                                     | 827 (66.8)        | 617 (64.7)                            | 714 (67.0)                        |
| Missing                                                    | 3 (0.3)           | 3 (0.3)                               | 10 (0.9)                          |
| <b>Climbing several flights of stairs</b>                  |                   |                                       |                                   |
| Yes, limited a lot                                         | 191 (15.4)        | 140 (14.7)                            | 161 (15.1)                        |
| Yes, limited a little                                      | 551 (44.5)        | 432 (45.3)                            | 462 (43.3)                        |
| No, not limited at all                                     | 491 (39.7)        | 376 (39.5)                            | 436 (40.9)                        |
| Missing                                                    | 4 (0.3)           | 5 (0.5)                               | 7 (0.7)                           |
| <b>Accomplished less than you would like (physically)</b>  |                   |                                       |                                   |
| Yes                                                        | 335 (27.1)        | 221 (23.2)                            | 265 (24.9)                        |
| No                                                         | 899 (72.6)        | 727 (76.3)                            | 795 (74.6)                        |
| Missing                                                    | 3 (0.3)           | 5 (0.5)                               | 6 (0.6)                           |
| <b>Limited in kind of activities</b>                       |                   |                                       |                                   |
| Yes                                                        | 299 (24.2)        | 221 (23.2)                            | 265 (24.9)                        |
| No                                                         | 934 (75.4)        | 729 (76.5)                            | 795 (74.6)                        |
| Missing                                                    | 4 (0.4)           | 3 (0.3)                               | 6 (0.6)                           |
| <b>Accomplished less than you would like (emotionally)</b> |                   |                                       |                                   |
| Yes                                                        | 251 (20.3)        | 212 (22.2)                            | 222 (20.8)                        |
| No                                                         | 982 (79.3)        | 735 (77.1)                            | 833 (78.1)                        |
| Missing                                                    | 4 (0.4)           | 6 (0.6)                               | 11 (1.0)                          |
| <b>Did not do activities as carefully as usual</b>         |                   |                                       |                                   |
| Yes                                                        | 215 (17.4)        | 181 (19.0)                            | 181 (17.0)                        |
| No                                                         | 1018 (82.2)       | 764 (80.2)                            | 875 (82.1)                        |
| Missing                                                    | 4 (0.4)           | 8 (0.8)                               | 10 (0.9)                          |
| <b>Pain interferes with normal work</b>                    |                   |                                       |                                   |
| Not at all                                                 | 596 (48.1)        | 479 (50.3)                            | 515 (48.3)                        |
| A little bit                                               | 312 (25.2)        | 243 (25.5)                            | 288 (27.0)                        |
| Moderately                                                 | 194 (15.7)        | 138 (14.5)                            | 142 (13.3)                        |
| Quite a bit                                                | 109 (8.8)         | 77 (8.1)                              | 98 (9.2)                          |
| Extremely                                                  | 20 (1.6)          | 13 (1.4)                              | 18 (1.7)                          |
| Missing                                                    | 6 (0.5)           | 3 (0.3)                               | 5 (0.5)                           |
| <b>Felt calm and peaceful</b>                              |                   |                                       |                                   |
| All of the time                                            | 87 (7.0)          | 73 (7.7)                              | 84 (7.9)                          |
| Most of the time                                           | 630 (50.9)        | 460 (48.3)                            | 527 (49.4)                        |
| A good bit of the time                                     | 184 (14.9)        | 163 (17.1)                            | 176 (16.5)                        |
| Some of the time                                           | 214 (17.3)        | 171 (17.9)                            | 164 (15.4)                        |
| A little of the time                                       | 96 (7.8)          | 70 (7.3)                              | 88 (8.3)                          |
| None of the time                                           | 23 (1.9)          | 11 (1.2)                              | 18 (1.7)                          |
| Missing                                                    | 3 (0.3)           | 5 (0.5)                               | 9 (0.8)                           |
| <b>Have a lot of energy</b>                                |                   |                                       |                                   |
| All of the time                                            | 36 (2.9)          | 36 (3.8)                              | 41 (3.8)                          |
| Most of the time                                           | 416 (33.6)        | 317 (33.3)                            | 375 (35.2)                        |
| A good bit of the time                                     | 263 (21.2)        | 206 (21.6)                            | 213 (20.0)                        |
| Some of the time                                           | 322 (26.0)        | 240 (25.2)                            | 249 (23.4)                        |
| A little of the time                                       | 156 (12.6)        | 116 (12.2)                            | 145 (13.6)                        |
| None of the time                                           | 41 (3.3)          | 34 (3.6)                              | 34 (3.2)                          |
| Missing                                                    | 3 (0.3)           | 4 (0.4)                               | 9 (0.8)                           |
| <b>Felt downhearted and blue</b>                           |                   |                                       |                                   |
| All of the time                                            | 4 (0.3)           | 5 (0.5)                               | 4 (0.4)                           |
| Most of the time                                           | 37 (3.0)          | 37 (3.9)                              | 34 (3.2)                          |
| A good bit of the time                                     | 79 (6.4)          | 51 (5.4)                              | 76 (7.1)                          |
| Some of the time                                           | 273 (22.1)        | 196 (20.6)                            | 216 (20.3)                        |
| A little of the time                                       | 480 (38.8)        | 399 (41.9)                            | 414 (38.8)                        |
| None of the time                                           | 361 (29.2)        | 261 (27.4)                            | 312 (29.3)                        |
| Missing                                                    | 3 (0.3)           | 4 (0.4)                               | 10 (0.9)                          |
| <b>Health interferes/social activities</b>                 |                   |                                       |                                   |
| All of the time                                            | 8 (0.6)           | 10 (1.0)                              | 16 (1.5)                          |
| Most of the time                                           | 63 (5.1)          | 42 (4.4)                              | 54 (5.1)                          |
| Some of the time                                           | 203 (16.4)        | 150 (15.7)                            | 169 (15.9)                        |
| A little of the time                                       | 238 (19.2)        | 182 (19.1)                            | 200 (18.8)                        |
| None of the time                                           | 722 (58.3)        | 565 (59.3)                            | 617 (57.9)                        |
| Missing                                                    | 3 (0.3)           | 4 (0.4)                               | 10 (0.9)                          |

**Supplementary Table 4- Proportion of different levels of State anxiety dimensions by study visits (Total n=2537).**

| State                                                    | Baseline<br>(n=1237) |            |               |              |         | 1 month post baseline CT scan<br>(n=953) |            |               |              |         | 12 months after baseline (n=1066) |            |               |              |          |
|----------------------------------------------------------|----------------------|------------|---------------|--------------|---------|------------------------------------------|------------|---------------|--------------|---------|-----------------------------------|------------|---------------|--------------|----------|
|                                                          | Not at all           | Somewhat   | Moderately so | Very much so | Missing | Not at all                               | Somewhat   | Moderately so | Very much so | Missing | Not at all                        | Somewhat   | Moderately so | Very much so | Missing  |
| <b>I feel calm</b>                                       | 17 (1.4)             | 167 (13.5) | 407 (32.9)    | 643 (51.9)   | 3 (0.3) | 31 (3.3)                                 | 136 (14.3) | 338 (35.5)    | 442 (46.4)   | 6 (0.6) | 18 (1.7)                          | 131 (12.3) | 393 (36.9)    | 516 (48.4)   | 8 (0.8)  |
| <b>I feel secure</b>                                     | 16 (1.3)             | 106 (8.6)  | 304 (24.6)    | 808 (65.3)   | 3 (0.3) | 21 (2.2)                                 | 115 (12.1) | 283 (29.7)    | 528 (55.4)   | 6 (0.6) | 24 (2.3)                          | 83 (7.8)   | 330 (31.0)    | 621 (58.3)   | 8 (0.8)  |
| <b>I feel tense</b>                                      | 685 (55.3)           | 319 (25.8) | 192 (15.5)    | 36 (2.9)     | 3 (0.3) | 465 (48.8)                               | 300 (31.5) | 144 (15.1)    | 39 (4.1)     | 5 (0.5) | 562 (52.7)                        | 282 (26.5) | 177 (16.6)    | 35 (3.3)     | 10 (1.0) |
| <b>I feel strained</b>                                   | 834 (67.4)           | 231 (18.7) | 131 (10.6)    | 38 (3.1)     | 3 (0.3) | 543 (57.0)                               | 261 (27.4) | 109 (11.4)    | 35 (3.7)     | 5 (0.5) | 652 (61.2)                        | 240 (22.5) | 134 (12.6)    | 33 (3.1)     | 7 (0.7)  |
| <b>I feel at ease</b>                                    | 41 (3.3)             | 154 (12.4) | 361 (29.2)    | 678 (54.8)   | 3 (0.3) | 45 (4.7)                                 | 154 (16.2) | 289 (30.3)    | 460 (48.3)   | 5 (0.5) | 27 (2.5)                          | 170 (15.9) | 323 (30.3)    | 538 (50.5)   | 8 (0.8)  |
| <b>I feel upset</b>                                      | 1003 (81.0)          | 137 (11.1) | 75 (6.1)      | 19 (1.5)     | 3 (0.3) | 660 (69.3)                               | 182 (19.1) | 78 (8.2)      | 28 (2.9)     | 5 (0.5) | 792 (74.3)                        | 175 (16.4) | 75 (7.0)      | 16 (1.5)     | 8 (0.8)  |
| <b>I am presently worrying over possible misfortunes</b> | 694 (56.1)           | 332 (26.8) | 156 (12.6)    | 52 (4.2)     | 3 (0.3) | 480 (50.4)                               | 295 (31.0) | 121 (12.7)    | 52 (5.5)     | 5 (0.5) | 555 (52.1)                        | 339 (31.8) | 115 (10.8)    | 49 (4.6)     | 8 (0.8)  |
| <b>I feel satisfied</b>                                  | 36 (2.9)             | 193 (15.6) | 469 (37.9)    | 536 (43.3)   | 3 (0.3) | 47 (4.9)                                 | 167 (17.5) | 324 (34.0)    | 410 (43.0)   | 5 (0.5) | 33 (3.1)                          | 192 (18.0) | 378 (35.5)    | 456 (42.8)   | 7 (0.7)  |
| <b>I feel frightened</b>                                 | 1008 (81.4)          | 149 (12.0) | 56 (4.5)      | 21 (1.7)     | 3 (0.3) | 718 (75.3)                               | 150 (15.7) | 59 (6.2)      | 21 (2.2)     | 5 (0.5) | 846 (79.4)                        | 148 (13.9) | 53 (5.0)      | 11 (1.0)     | 8 (0.8)  |
| <b>I feel comfortable</b>                                | 30 (2.4)             | 133 (10.7) | 352 (28.4)    | 719 (58.1)   | 3 (0.3) | 31 (3.3)                                 | 135 (14.2) | 291 (30.5)    | 490 (51.4)   | 6 (0.6) | 23 (2.2)                          | 142 (13.3) | 333 (31.2)    | 561 (52.6)   | 7 (0.7)  |
| <b>I feel self-confident</b>                             | 36 (2.9)             | 127 (10.3) | 439 (35.5)    | 632 (51.1)   | 3 (0.3) | 38 (4.0)                                 | 106 (11.1) | 359 (37.7)    | 445 (46.7)   | 5 (0.5) | 24 (2.3)                          | 127 (11.9) | 394 (37.0)    | 514 (48.2)   | 7 (0.7)  |
| <b>I feel nervous</b>                                    | 780 (63.0)           | 308 (24.9) | 117 (9.5)     | 29 (2.3)     | 3 (0.3) | 559 (58.7)                               | 255 (26.8) | 99 (10.4)     | 35 (3.7)     | 5 (0.5) | 662 (62.1)                        | 261 (24.5) | 114 (10.7)    | 22 (2.1)     | 22 (2.1) |
| <b>I am jittery</b>                                      | 968 (78.2)           | 174 (14.1) | 73 (5.9)      | 18 (1.5)     | 4 (0.4) | 692 (72.6)                               | 152 (15.9) | 77 (8.1)      | 27 (2.8)     | 5 (0.5) | 811 (76.1)                        | 155 (14.5) | 77 (7.2)      | 15 (1.4)     | 8 (0.8)  |
| <b>I feel indecisive</b>                                 | 846 (68.3)           | 269 (21.7) | 97 (7.8)      | 22 (1.8)     | 3 (0.3) | 557 (58.4)                               | 246 (25.8) | 113 (11.9)    | 32 (3.4)     | 5 (0.5) | 662 (62.1)                        | 256 (24.0) | 100 (9.4)     | 39 (3.7)     | 9 (0.9)  |
| <b>I am relaxed</b>                                      | 48 (3.9)             | 181 (14.6) | 394 (31.8)    | 611 (49.4)   | 3 (0.3) | 52 (5.5)                                 | 173 (18.2) | 313 (32.8)    | 409 (42.9)   | 6 (0.6) | 30 (2.8)                          | 172 (16.1) | 377 (35.4)    | 480 (45.0)   | 7 (0.7)  |
| <b>I feel content</b>                                    | 48 (3.9)             | 161 (13.0) | 436 (35.2)    | 589 (47.6)   | 3 (0.3) | 52 (5.5)                                 | 147 (15.4) | 339 (35.6)    | 410 (43.0)   | 5 (0.5) | 37 (3.5)                          | 151 (14.2) | 408 (38.3)    | 463 (43.4)   | 7 (0.7)  |
| <b>I am worried</b>                                      | 651 (52.6)           | 390 (31.5) | 146 (11.8)    | 47 (3.8)     | 3 (0.3) | 423 (44.4)                               | 333 (34.9) | 134 (14.1)    | 58 (6.1)     | 5 (0.5) | 518 (48.6)                        | 361 (33.9) | 129 (12.1)    | 51 (4.8)     | 7 (0.7)  |
| <b>I feel confused</b>                                   | 1075 (86.8)          | 112 (9.0)  | 32 (2.6)      | 12 (1.0)     | 6 (0.5) | 755 (79.2)                               | 135 (14.2) | 40 (4.2)      | 18 (1.9)     | 5 (0.5) | 887 (83.2)                        | 99 (9.3)   | 50 (4.7)      | 20 (1.9)     | 10 (1.0) |
| <b>I feel steady</b>                                     | 43 (3.5)             | 141 (11.4) | 327 (26.4)    | 720 (58.2)   | 6 (0.5) | 43 (4.5)                                 | 126 (13.2) | 272 (28.5)    | 507 (53.2)   | 5 (0.5) | 41 (3.8)                          | 120 (11.3) | 316 (29.6)    | 581 (54.5)   | 8 (0.8)  |
| <b>I feel pleasant</b>                                   | 25 (2.0)             | 118 (9.5)  | 416 (33.6)    | 672 (54.3)   | 6 (0.5) | 30 (3.1)                                 | 117 (12.3) | 319 (33.5)    | 482 (50.6)   | 5 (0.5) | 25 (2.3)                          | 115 (10.8) | 365 (34.2)    | 552 (51.8)   | 9 (0.9)  |
